# Supplementary material for: Coordinative chain transfer polymerization of 1-decene in the presence of a Ti-based diamine bis(phenolate) catalyst: a sustainable approach to produce low viscosity PAOs
Source: Royal Society of Chemistry journal article supplement (doi:10.1039/d0gc00439a), 2020-01-01
Supplement: d0gc00439a1.pdf [file d0gc00439a1.pdf]

**Electronic Supporting Information**

**For**

**Coordinative Chain Transfer Polymerization of 1-Decene in the Presence of A  
Ti-Based Diamine Bis(phenolate) Catalyst: A Sustainable Approach to  
Produce Low Viscosity PAOs**

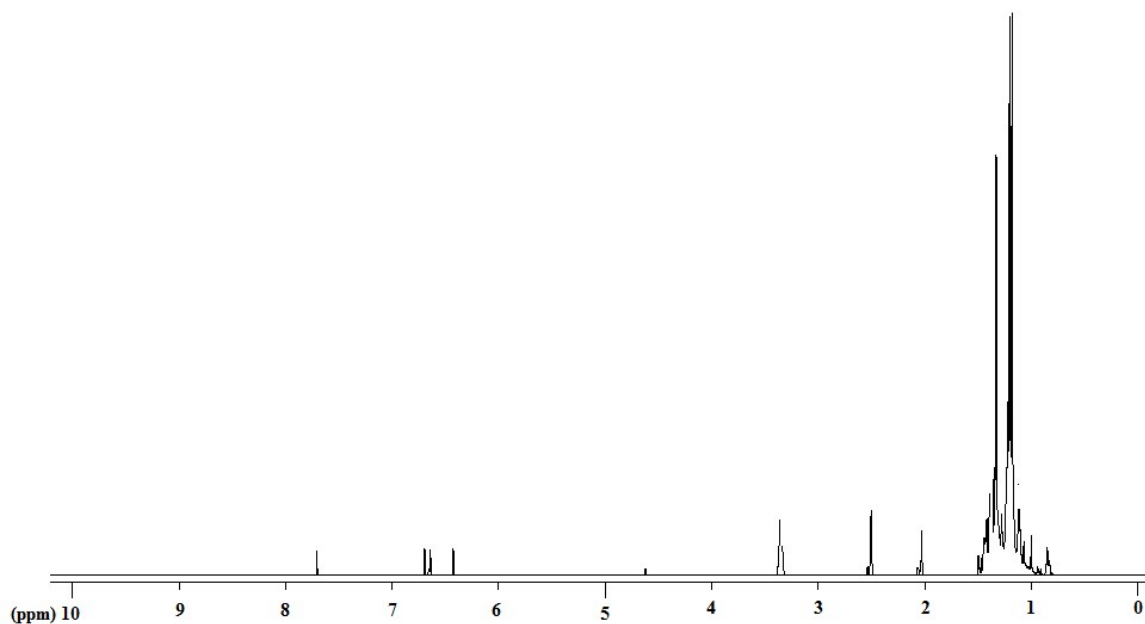

Fig S1. <sup>1</sup>H-NMR spectrum of synthesized N,N'-Bis(2-hydroxy-3,5-di-tert-butylphenyl) 4,5-dimethyl-1,2-phenylenediamine ligand, [L<sub>1</sub>]

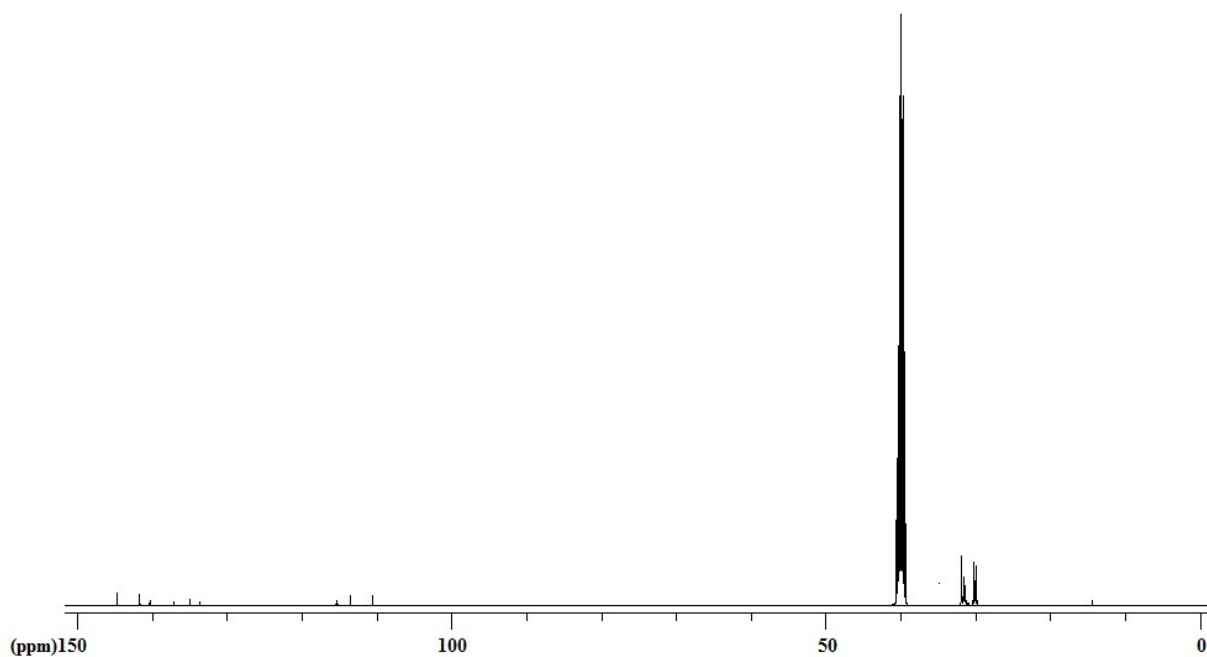

Fig S2.  $^{13}\text{C}$ -NMR spectrum of synthesized  $N,N'$ -Bis(2-hydroxy-3,5-di-*tert*-butylphenyl) 4,5-dimethyl-1,2-phenylenediamine ligand, [L<sub>1</sub>]

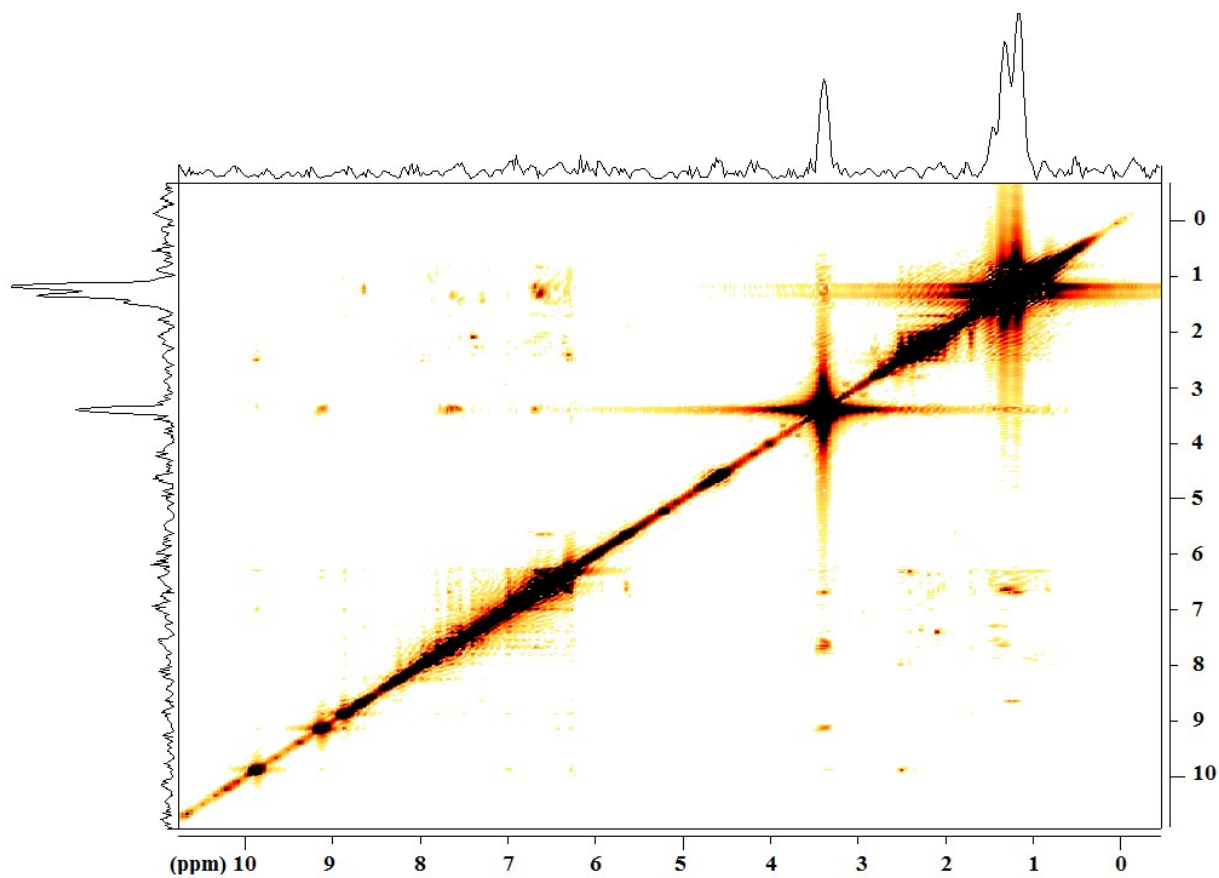

Fig S3.  $^1\text{H}$ - $^1\text{H}$ -COSY spectrum of synthesized  $N,N'$ -Bis(2-hydroxy-3,5-di-*tert*-butylphenyl) 4,5-dimethyl-1,2-phenylenediamine ligand,  $[\text{L}_1]$

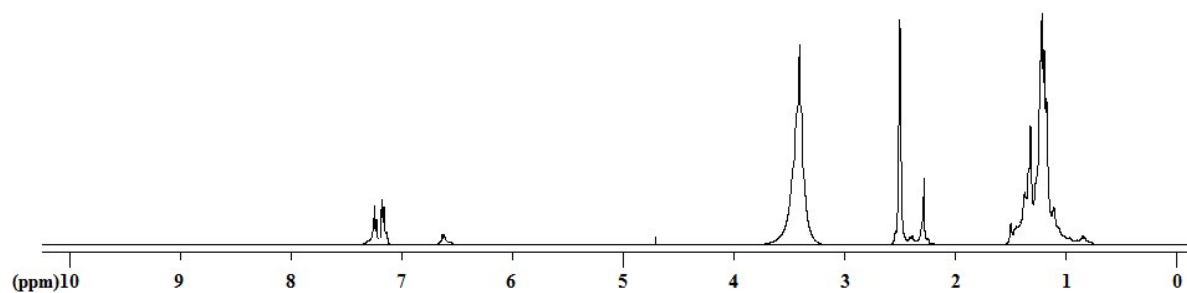

Fig S4.  $^1\text{H}$ -NMR spectrum of synthesized  $\text{Ti}\{2,2'-(\text{OC}_6\text{H}_2-4,6\text{-}^t\text{Bu}_2)_2\text{NHMePhMeNH}\}(\text{Cl}_2)$ , [cat]

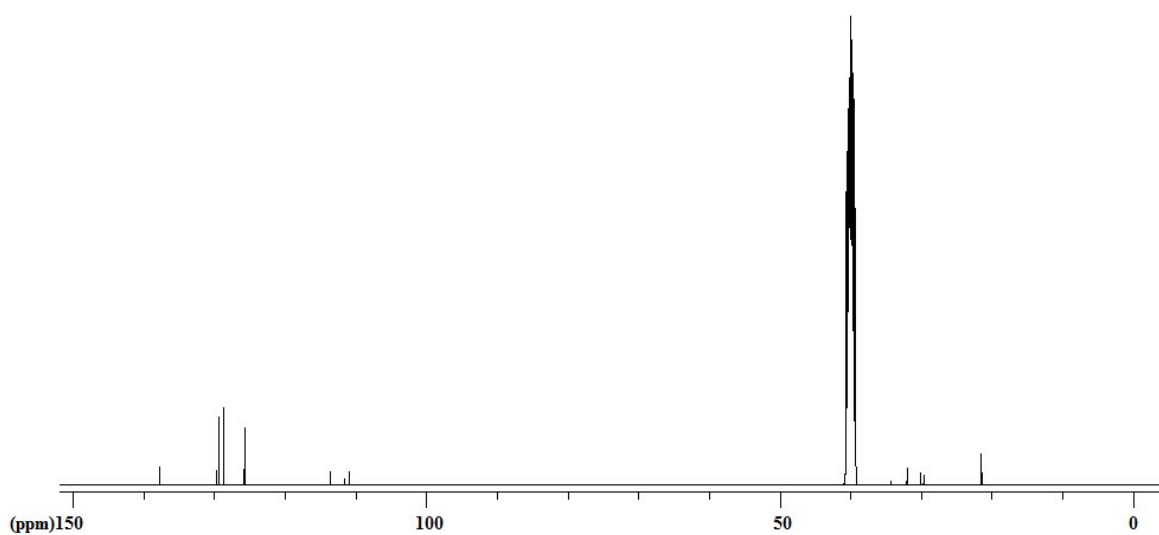

Fig S5.  $^{13}\text{C}$ -NMR spectrum of synthesized  $\text{Ti}\{2,2'-(\text{OC}_6\text{H}_2-4,6\text{-}^t\text{Bu}_2)_2\text{NHMePhMeNH}\}(\text{Cl}_2)$ ,  
[cat]

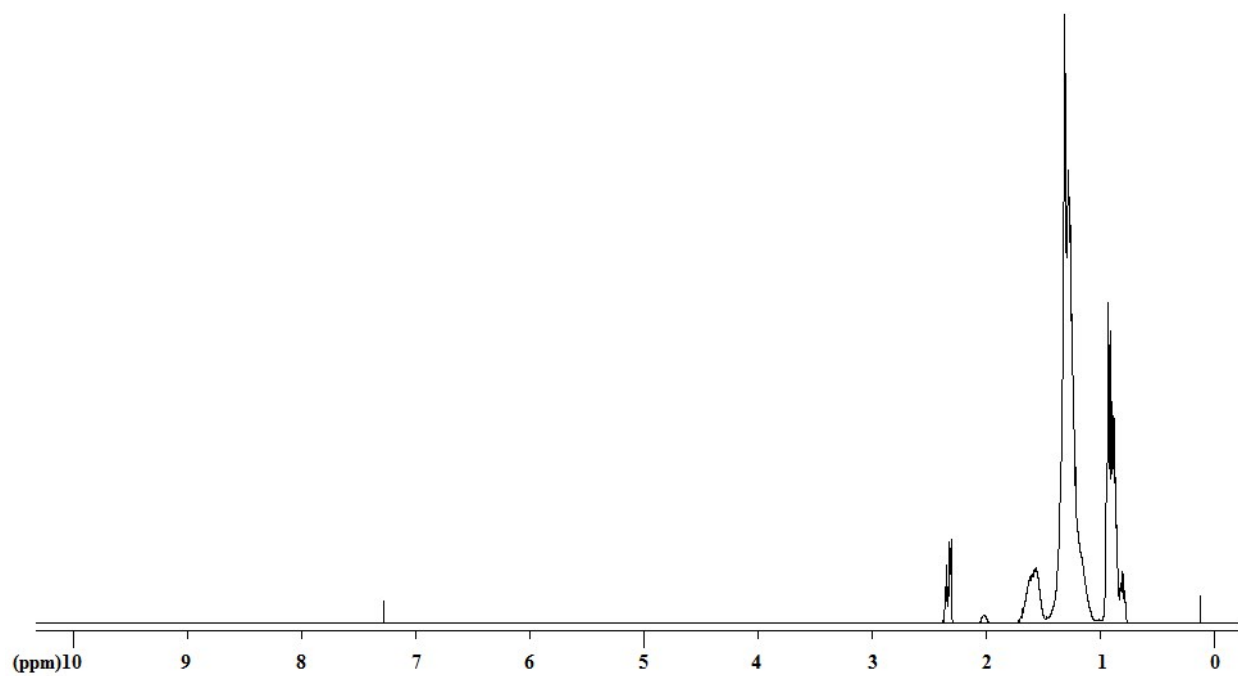

Fig S6. <sup>1</sup>H-NMR spectrum of prepared oligomer by Run1, Zn/Ti=0.

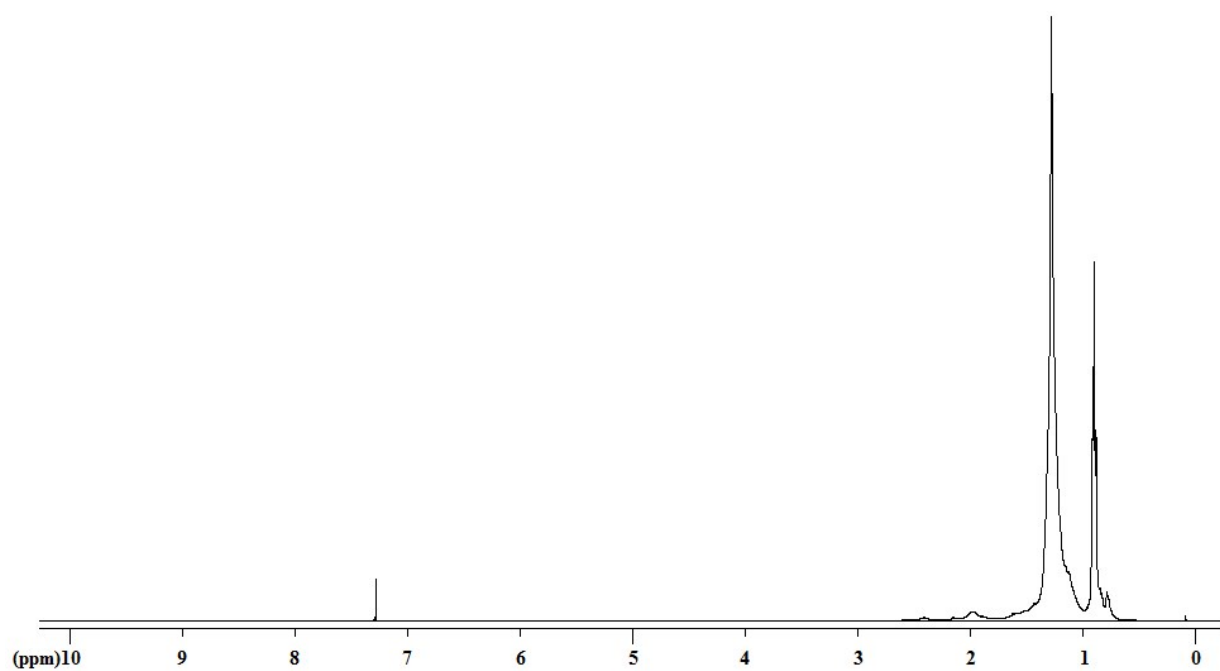

Fig S7. <sup>1</sup>H-NMR spectrum of prepared oligomer by Run2, Zn/Ti=30.

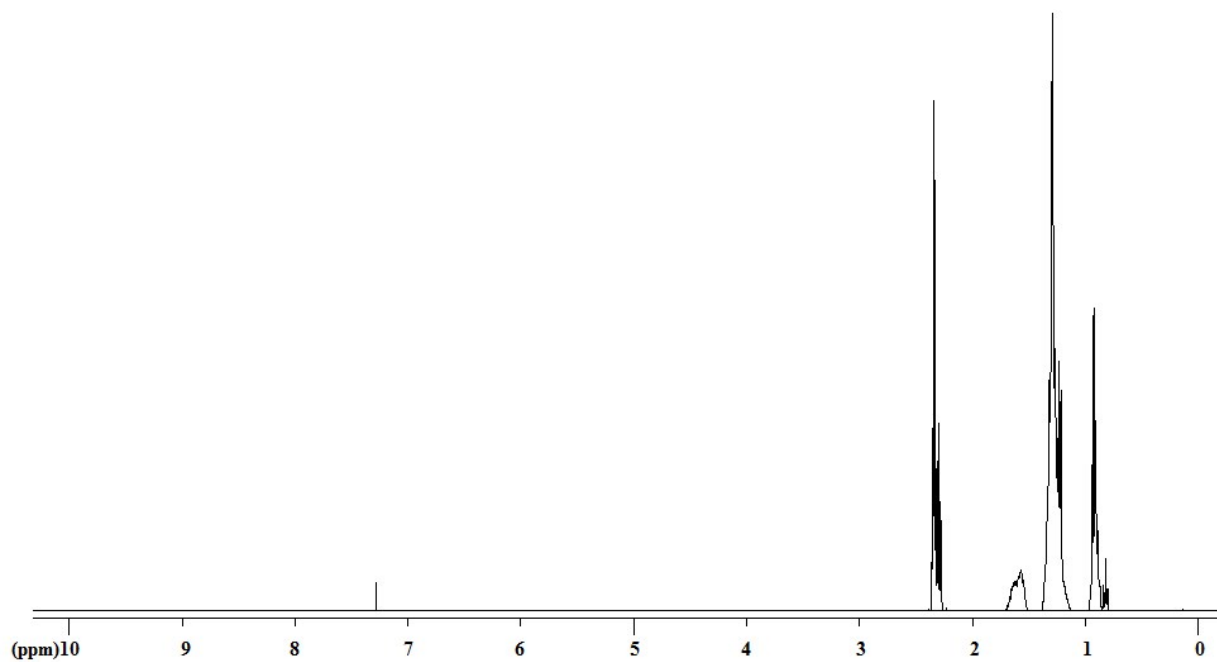

Fig S8. <sup>1</sup>H-NMR spectrum of prepared oligomer by Run3, Zn/Ti=90

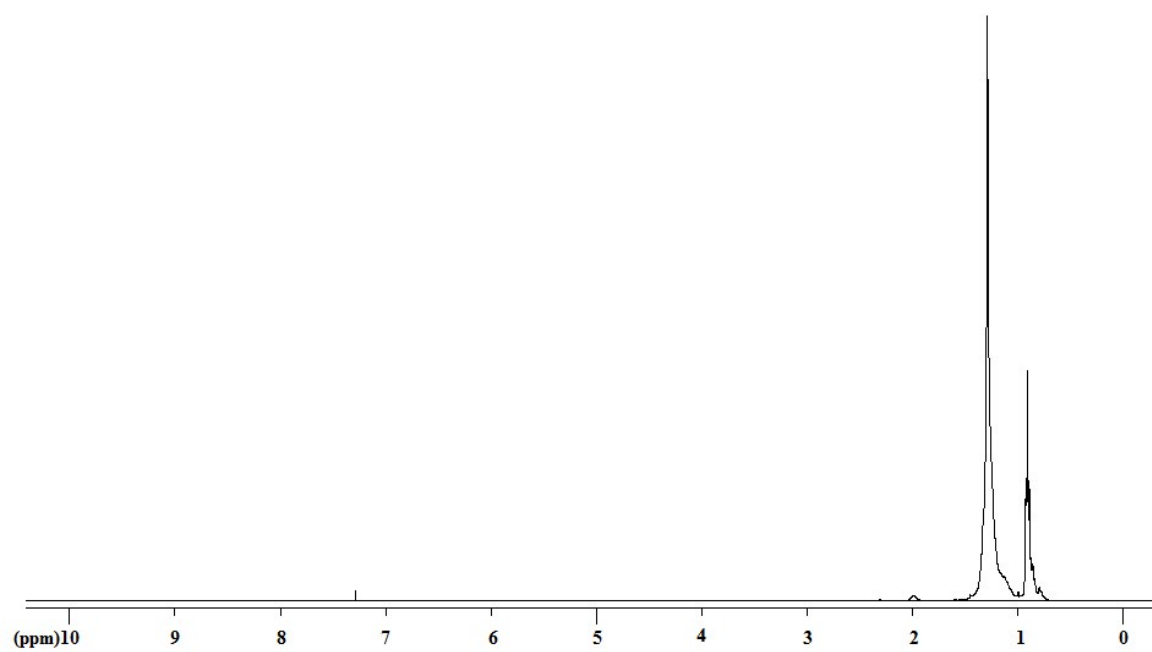

Fig S9. <sup>1</sup>H-NMR spectrum of prepared oligomer by Run4, Zn/Ti=120.

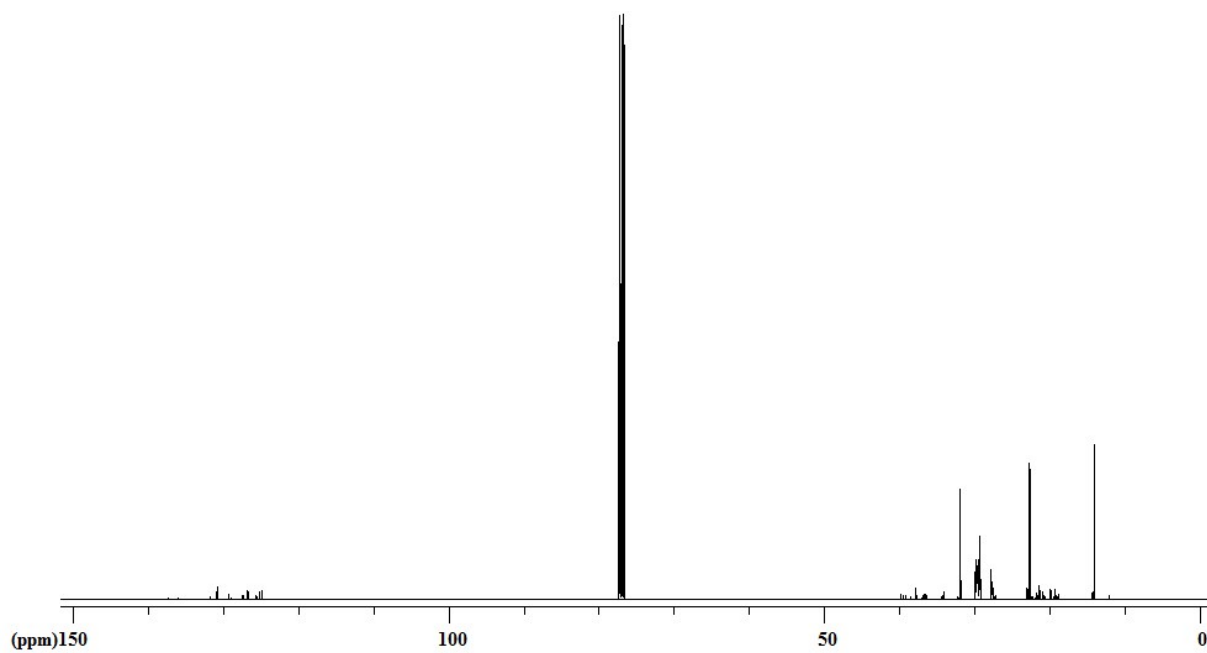

Fig S10.  $^{13}\text{C}$ -NMR spectrum of prepared oligomer by Run1, Zn/Ti=0.

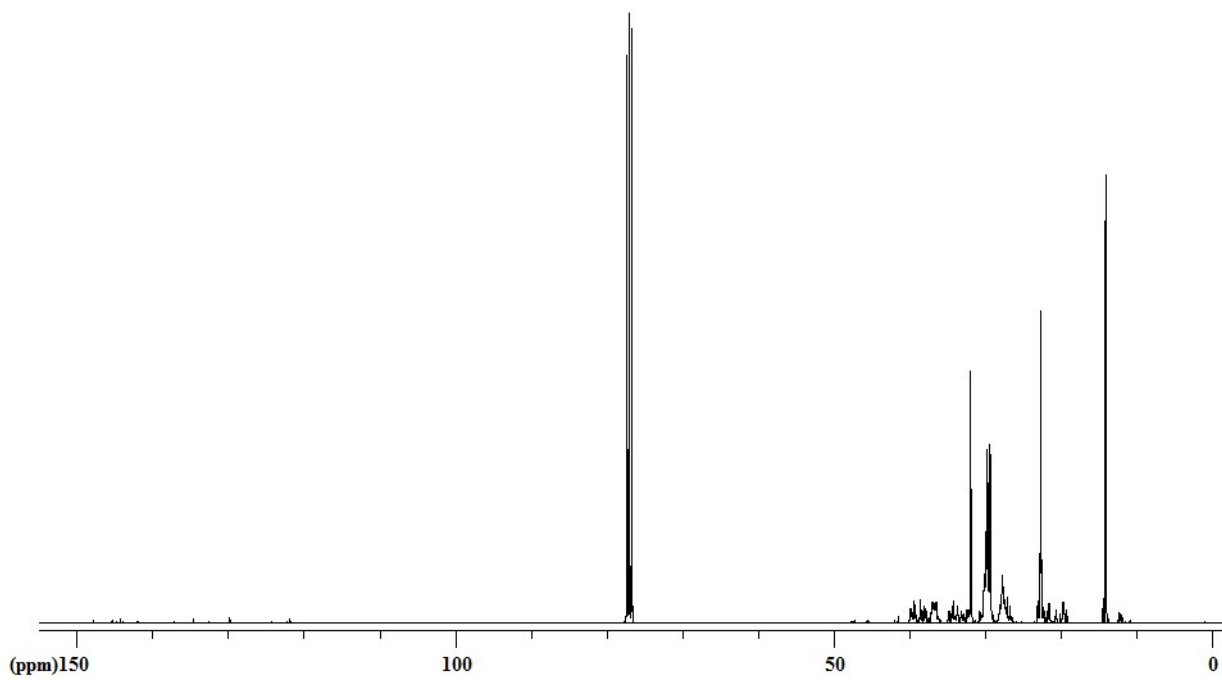

Fig S11.  $^{13}\text{C}$ -NMR spectrum of prepared oligomer by Run2, Zn/Ti=30 .

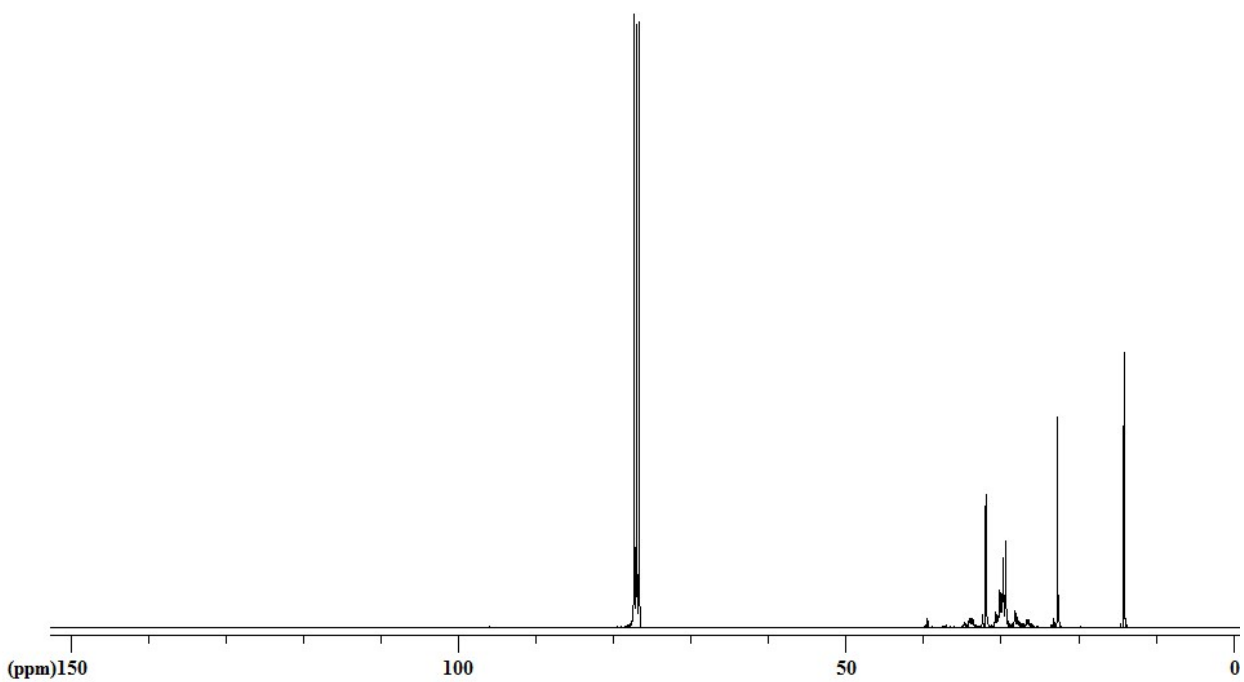

Fig S12.  $^{13}\text{C}$ -NMR spectrum of prepared oligomer by Run3, Zn/Ti=90 .

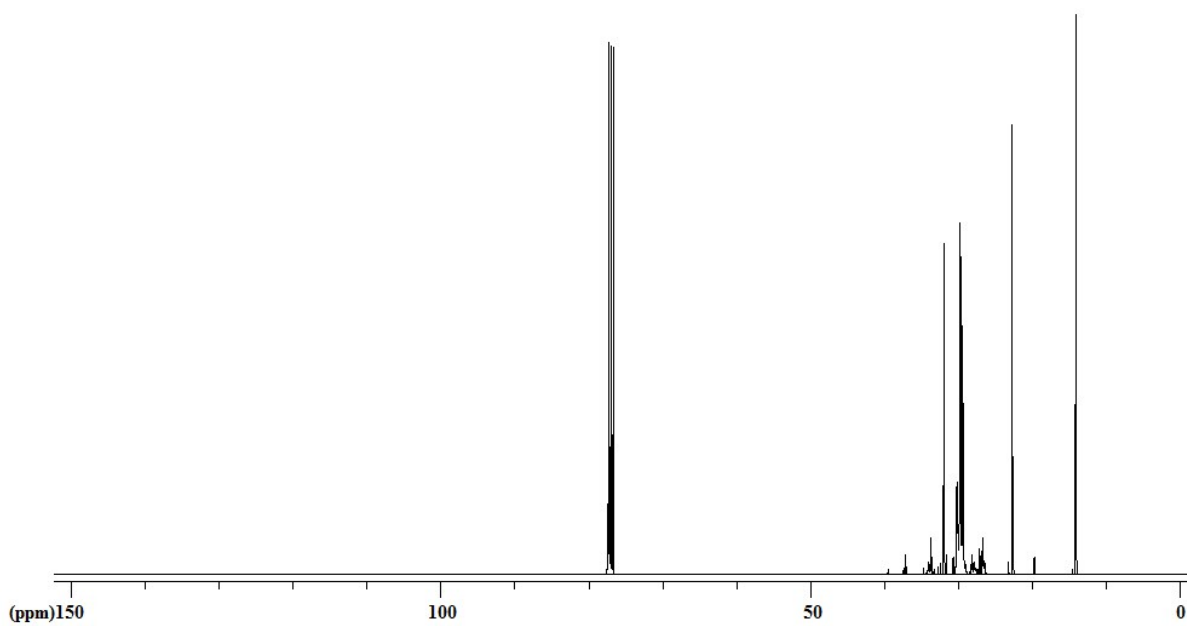

Fig S13.  $^{13}\text{C}$ -NMR spectrum of prepared oligomer by Run4, Zn/Ti=120 .

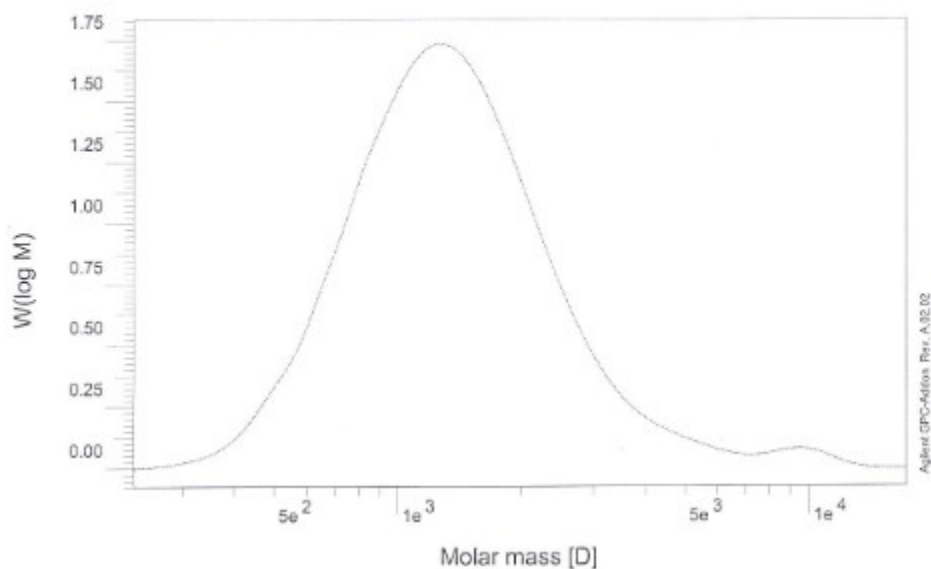

Sample : 1  
 Injection Date : 22-Jan-19, 08:45:57  
 Calibration File : G:\GOZARESHATI\CAL-CURVE\CAL-97-07-18.CAL  
 Calibration Date : Thursday 18/10/18 08:02:48  
 Baseline from : 15.092 min  
 Integration from : 15.092 min  
 MHK - A (Cal.): 0.000000E+0  
 Eluent : THF  
 Concentration : 1.000 g/l  
 Column 1 : PLgel OH-MIXED C  
 Detector 1 : RID A, Refractive Index Signal  
 Operator : IPP1  
 Baseline to : 19.251 min  
 Integration to : 19.251 min  
 MHK - K (Cal.): 1.000000E+0 ml/g  
 Flowrate : 1.000 ml/min  
 Inject volume : 20.000 ul  
 Temperature : 30.010 C  
 Delay volume : 0.000 ml  
 Acquisition interval : 0.430 sec

rid1A  
 Mn : 1.1620e3 g/mol  
 Mw : 1.6525e3 g/mol  
 Mz : 2.7766e3 g/mol  
 Mv : 0.000000 g/mol  
 D : 1.4220e0  
 [n] : 0.000000 ml/g  
 Vp : 1.7597e1 ml  
 Mp : 1.2675e3 g/mol  
 A : 6.3953e3 ml\*V  
 < 227 0.00  
 w% : 100.00  
 > 17095 0.00

Fig S14. GPC curve of prepared oligomer by Run1([Cat]= 5.0 mg, 1-decene=53 mmol, t=120 min, T= 80 °C, Zn/Ti=0, single-stage ).



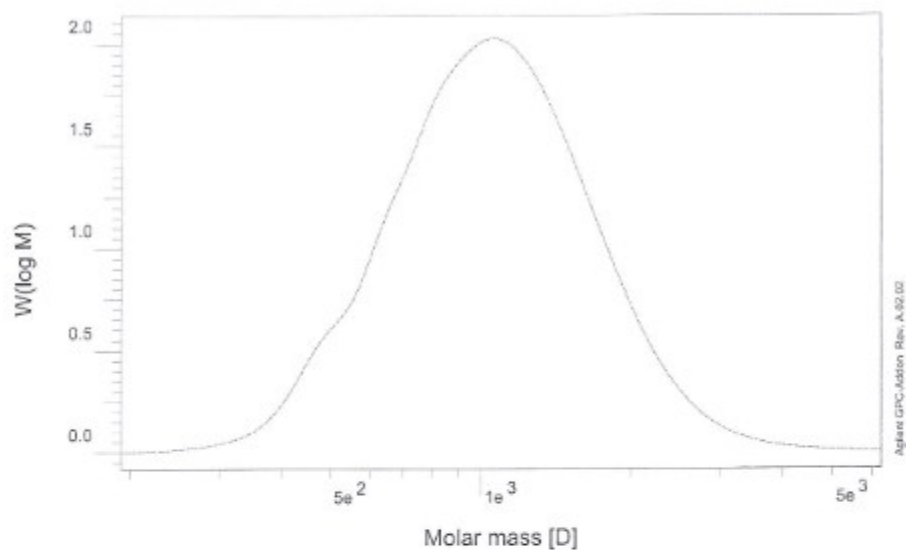

|                    |                                          |                        |                  |
|--------------------|------------------------------------------|------------------------|------------------|
| Sample :           | 2                                        |                        |                  |
| Injection Date :   | 22-Jan-19, 09:19:48                      |                        |                  |
| Calibration File : | G:\GOZARESHAT\CAL-CURVE\CAL-97-07-16.CAL |                        |                  |
| Calibration Date : | Thursday 18/10/18 08:02:48               |                        |                  |
| Baseline from :    | 16.057 min                               | Baseline to :          | 19.413 min       |
| Integration from:  | 16.057 min                               | Integration to :       | 19.413 min       |
| MHK - A (Cal.):    | 0.000000E+0                              | MHK - K (Cal.):        | 1.000000E+0 ml/g |
| Eluent :           | THF                                      | Flowrate :             | 1.000 ml/min     |
| Concentration :    | 1.000 g/l                                | Inject volume :        | 20.000 $\mu$ l   |
| Column 1 :         | PLgel OH-MIXED C                         | Temperature :          | 29.990 C         |
| Detector 1 :       | RID A, Refractive Index Signal           | Delay volume :         | 0.000 ml         |
| Operator :         | IPPI                                     | Acquisition interval : | 0.430 sec        |

rid1A

|          |          |                   |
|----------|----------|-------------------|
| Mn :     | 9.3882e2 | g/mol             |
| Mw :     | 1.1525e3 | g/mol             |
| Mz :     | 1.4164e3 | g/mol             |
| Mv :     | 0.000000 | g/mol             |
| D :      | 1.2276e0 |                   |
| [n] :    | 0.000000 | ml/g              |
| Vp :     | 1.7770e1 | ml                |
| Mp :     | 1.0592e3 | g/mol             |
| A :      | 1.4319e4 | ml <sup>2</sup> V |
| < 192 :  | 0.00     |                   |
| w% :     | 100.00   |                   |
| > 6270 : | 0.00     |                   |

Fig S15. GPC curve of prepared oligomer by Run2([Cat]= 5.0 mg, 1-decene=53 mmol, t=120 min, T= 80 °C, Zn/Ti=30, single-stage ).

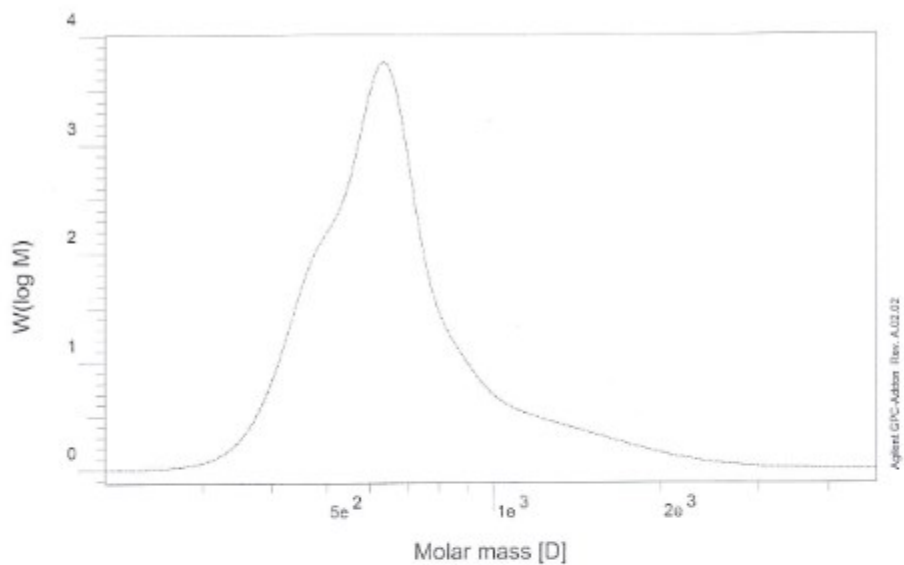

|                    |                                           |                        |                  |
|--------------------|-------------------------------------------|------------------------|------------------|
| Sample :           | 3                                         |                        |                  |
| Injection Date :   | 22-Jan-19, 09:55:55                       |                        |                  |
| Calibration File : | G:\GOZARESHATI\CAL-CURVE\CAL-97-07-18.CAL |                        |                  |
| Calibration Date : | Thursday 18/10/18 08:02:48                |                        |                  |
| Baseline from :    | 16.298 min                                | Baseline to :          | 19.373 min       |
| Integration from : | 16.298 min                                | Integration to :       | 19.373 min       |
| MHK - A (Cal.):    | 0.000000E+0                               | MHK - K (Cal.):        | 1.000000E+0 ml/g |
| Eluent :           | THF                                       | Flowrate :             | 1.000 ml/min     |
| Concentration :    | 1.000 g/l                                 | Inject volume :        | 20.000 ul        |
| Column 1 :         | PLgel OH-MIXED C                          | Temperature :          | 30.000 C         |
| Detector 1 :       | RID A, Refractive Index Signal            | Delay volume :         | 0.000 ml         |
| Operator :         | IPPI                                      | Acquisition interval : | 0.430 sec        |

  

|        |          |       |
|--------|----------|-------|
|        | rid1A    |       |
| Mn :   | 6.3021e2 | g/mol |
| Mw :   | 7.2847e2 | g/mol |
| Mz :   | 9.0484e2 | g/mol |
| Mv :   | 0.000000 | g/mol |
| D :    | 1.1559e0 |       |
| [n] :  | 0.000000 | ml/g  |
| Vp :   | 1.8259e1 | ml    |
| Mp :   | 6.3687e2 | g/mol |
| A :    | 1.1711e4 | ml*V  |
| < 200  | 0.00     |       |
| w% :   | 100.00   |       |
| > 4886 | 0.00     |       |

Fig S16. GPC curve of prepared oligomer by Run3([Cat]= 5.0 mg, 1-decene=53 mmol, t=120 min, T= 80 °C, Zn/Ti=90, single-stage ).

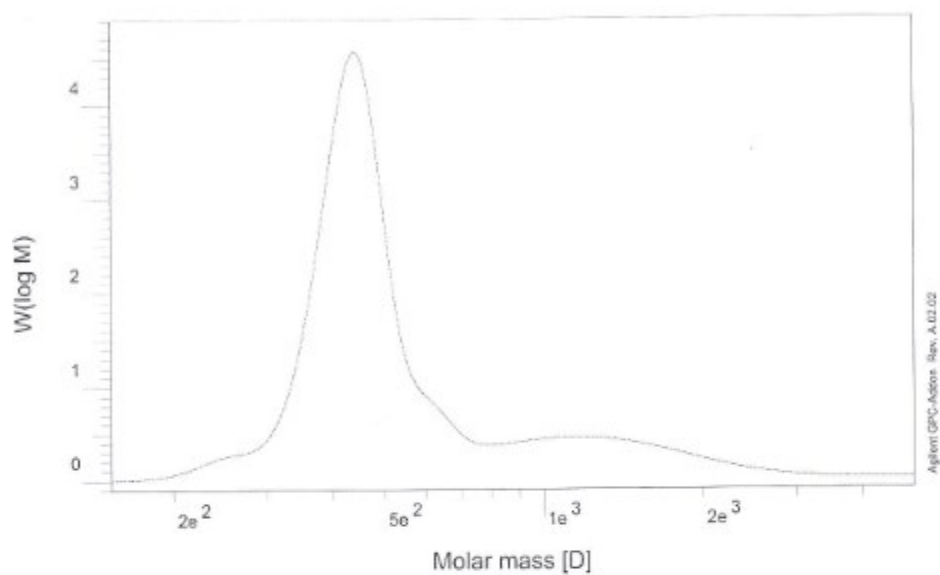

Sample : 3  
 Injection Date : 26-Nov-18, 13:23:01  
 Calibration File : G:\GOZARESHATI\CAL-CURVE\CAL-97-07-18.CAL  
 Calibration Date : Thursday 18/10/18 08:02:48  
 Baseline from : 16.280 min  
 Integration from : 16.280 min  
 MHK - A (Cal.): 0.000000E+0  
 Eluent : THF  
 Concentration : 1.000 g/l  
 Column 1 : PLgel OH-MIXED C  
 Detector 1 : RID A, Refractive Index Signal  
 Operator : IPP  
 Baseline to : 19.638 min  
 Integration to : 19.638 min  
 MHK - K (Cal.): 1.000000E+0 ml/g  
 Flowrate : 1.000 ml/min  
 Inject volume : 20.000 ul  
 Temperature : 30.010 C  
 Delay volume : 0.000 ml  
 Acquisition interval : 0.430 sec

rid1A  
 Mn : 4.8267e2 g/mol  
 Mw : 6.1826e2 g/mol  
 Mz : 9.2668e2 g/mol  
 Mv : 0.000000 g/mol  
 D : 1.2809e0  
 [n] : 0.000000 ml/g  
 Vp : 1.8612e1 ml  
 Mp : 4.4151e2 g/mol  
 A : 1.2942e4 ml\*V  
 < 152 0.00  
 w% : 100.00  
 > 4974 0.00

Fig S17. GPC curve of prepared oligomer by Run4([Cat]= 5.0 mg, 1-decene=53 mmol , t=120 min, T= 80 °C, Zn/Ti=120, single-stage ).

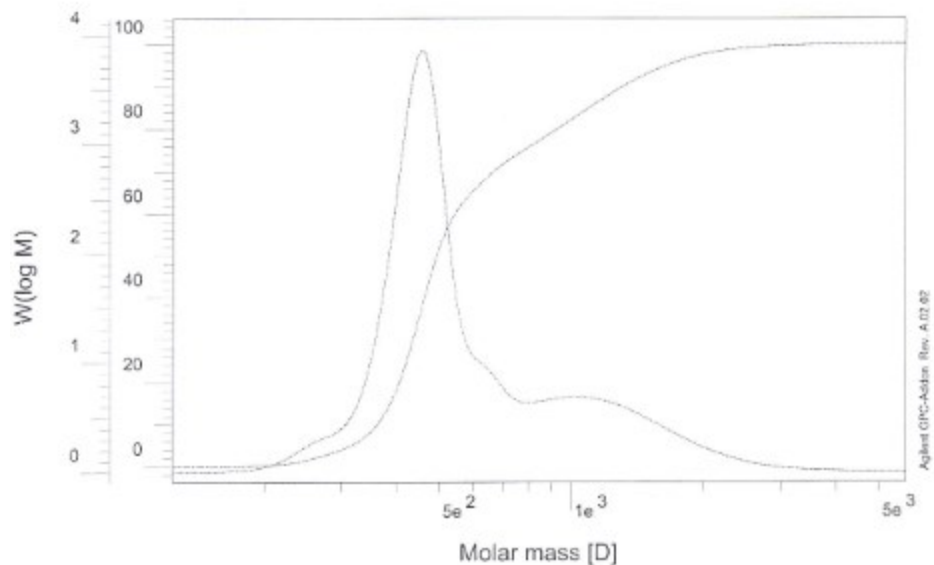

**Sample :** 4  
**Injection Date :** 22-Jan-18, 10:30:12  
**Calibration File :** G:\GOZARESHATI\CAL-CURVE\CAL-97-07-18.CAL  
**Calibration Date :** Thursday 18/10/18 08:02:48  
**Baseline from :** 16.139 min  
**Integration from :** 16.139 min  
**MHK - A (Cal.):** 0.000000E+0  
**Eluent :** THF  
**Concentration :** 1.000 g/l  
**Column 1 :** PLgel OH-MIXED C  
**Detector 1 :** RID A, Refractive Index Signal  
**Operator :** IPPI  
**Baseline to :** 19.835 min  
**Integration to :** 19.835 min  
**MHK - K (Cal.):** 1.000000E+0 ml/g  
**Flowrate :** 1.000 ml/min  
**Inject volume :** 20.000 ul  
**Temperature :** 30.000 C  
**Delay volume :** 0.000 ml  
**Acquisition interval :** 0.430 sec

rid1A

**Mn :** 5.2580e2 g/mol  
**Mw :** 6.8943e2 g/mol  
**Mz :** 1.0164e3 g/mol  
**Mv :** 0.000000 g/mol  
**D :** 1.3112e0  
**[n] :** 0.000000 ml/g  
**Vp :** 1.8576e1 ml  
**Mp :** 4.5834e2 g/mol  
**A :** 5.3603e3 ml<sup>2</sup>/V  
**< 123 :** 0.00  
**w% :** 100.00  
**> 5760 :** 0.00

Fig S18. GPC curve of prepared oligomer by Run5([Cat]= 5.0 mg, 1-decene=53 mmol, t=120 min, T= 80 °C, Zn/Ti=120, two-stage ).

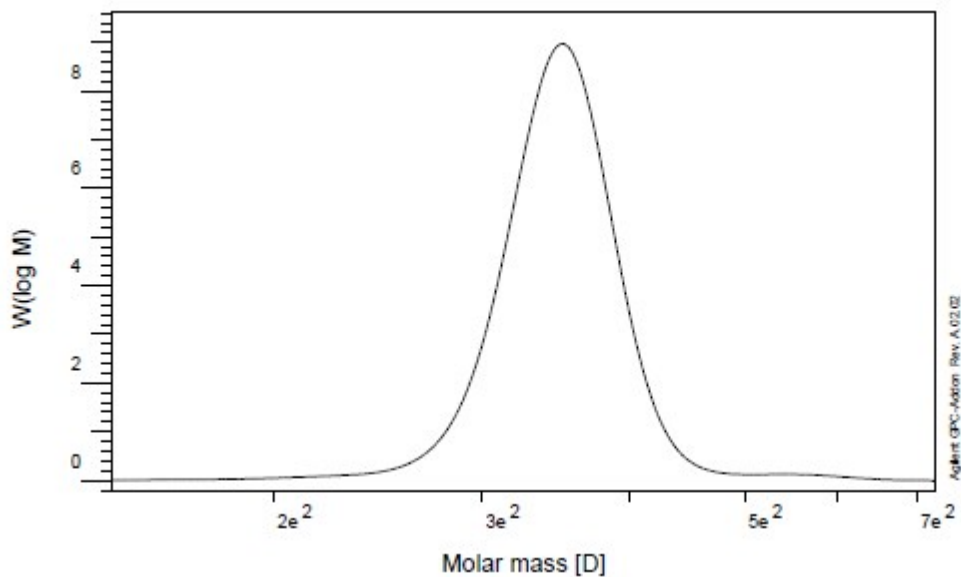

**Sample :** PAO2  
**Injection Date :** 22-Jan-17, 09:18:15  
**Calibration File :** C:\HPCHEM\1\DATA\139510\95-10-CAL-L-02.CAL  
**Calibration Date :** Monday 17/01/16 14:36:38  
**Baseline from :** 18.276 min  
**Integration from :** 18.276 min  
**MHK - A (Cal.):** 0.000000E+0  
**Eluent :** THF  
**Concentration :** 1.000 g/l  
**Column 1 :** PLgel OH-MIXED C  
**Detector 1 :** RID A, Refractive Index Signal  
**Operator :** IPP1

**Baseline to :** 19.852 min  
**Integration to :** 19.852 min  
**MHK - K (Cal.):** 1.000000E+0 ml/g  
**Flowrate :** 1.000 ml/min  
**Inject volume :** 20.000 ul  
**Temperature :** 30.010 C  
**Delay volume :** 0.000 ml  
**Acquisition interval :** 0.430 sec

**rid1A**

|                 |          |                    |
|-----------------|----------|--------------------|
| <b>Mn :</b>     | 3.4524e2 | g/mol              |
| <b>Mw :</b>     | 3.5101e2 | g/mol              |
| <b>Mz :</b>     | 3.5694e2 | g/mol              |
| <b>Mv :</b>     | 0.000000 | g/mol              |
| <b>D :</b>      | 1.0167e0 |                    |
| <b>[n] :</b>    | 0.000000 | ml/g               |
| <b>Vp :</b>     | 1.8994e1 | ml                 |
| <b>Mp :</b>     | 3.4970e2 | g/mol              |
| <b>A :</b>      | 2.4463e3 | ml <sup>3</sup> /V |
| <b>&lt; 145</b> | 0.00     |                    |
| <b>w%</b>       | 100.00   |                    |
| <b>&gt; 726</b> | 0.00     |                    |

Fig S19. GPC curve of prepared oligomer by Run3([Cat]= 5.0 mg, 1-decene=53 mmol , t=30 min, T= 80 °C, Zn/Ti=90, single-stage ).

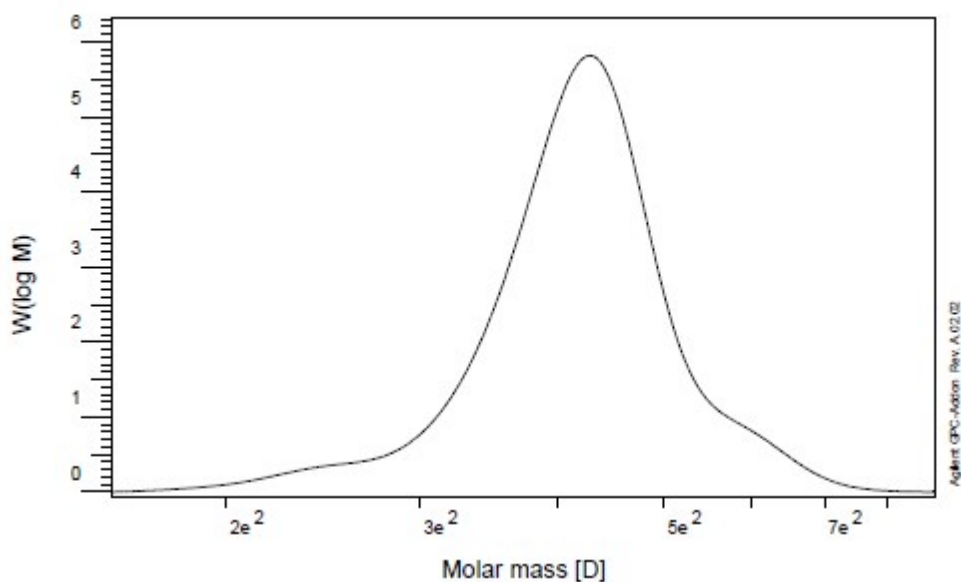

Sample : 131-C  
 Injection Date : 14-May-18, 10:46:44  
 Calibration File : G:\GOZARESHATICAL\CAL-070120-.CAL  
 Calibration Date : Wednesday 18/04/18 10:32:30  
 Baseline from : 18.010 min  
 Integration to : 19.685 min  
 Integration from : 18.010 min  
 MHK - A (Cal.): 0.000000E+0  
 MHK - K (Cal.): 1.000000E+0 ml/g  
 Eluent : THF  
 Flowrate : 1.000 ml/min  
 Concentration : 1.000 g/l  
 Inject volume : 20.000 ul  
 Column 1 : PLgel OH-MIXED C  
 Temperature : 29.960 C  
 Detector 1 : RID A, Refractive Index Signal  
 Delay volume : 0.000 ml  
 Operator : IPP1  
 Acquisition interval : 0.430 sec

**rid1A**  
**Mn** : 4.0589e2 g/mol  
**Mw** : 4.2412e2 g/mol  
**Mz** : 4.4146e2 g/mol  
**Mv** : 0.000000 g/mol  
**D** : 1.0449e0  
**[n]** : 0.000000 ml/g  
**Vp** : 1.8713e1 ml  
**Mp** : 4.2879e2 g/mol  
**A** : 4.3542e3 ml<sup>3</sup>V  
**< 157** : 0.00  
**w%** : 100.00  
**> 883** : 0.00

Fig S20. GPC curve of prepared oligomer by Run3([Cat]= 5.0 mg, 1-decene=53 mmol , t=60 min, T= 80 °C, Zn/Ti=90, single-stage ).

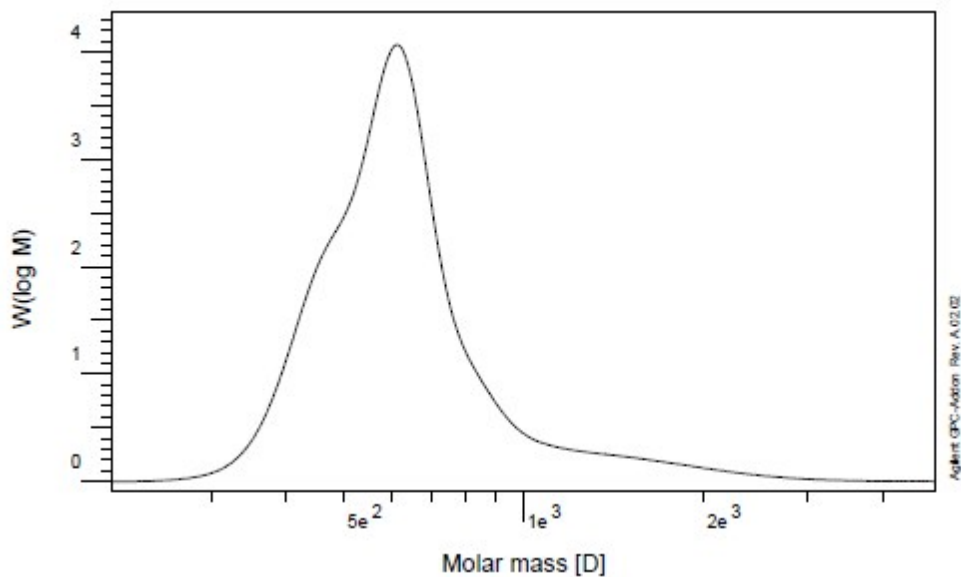

**Sample :** 1  
**Injection Date :** 26-Nov-18, 12:16:52  
**Calibration File :** G:\GOZARESHATI\CAL-CURVE\CAL-97-07-18.CAL  
**Calibration Date :** Thursday 18/10/18 08:02:48  
**Baseline from :** 16.292 min  
**Integration from :** 16.292 min  
**MHK - A (Cal.):** 0.000000E+0  
**Eluent :** THF  
**Concentration :** 1.000 g/l  
**Column 1 :** PLgel OH-MIXED C  
**Detector 1 :** RID A, Refractive Index Signal  
**Operator :** IPP1  
**Baseline to :** 19.353 min  
**Integration to :** 19.353 min  
**MHK - K (Cal.):** 1.000000E+0 ml/g  
**Flowrate :** 1.000 ml/min  
**Inject volume :** 20.000 ul  
**Temperature :** 29.970 C  
**Delay volume :** 0.000 ml  
**Acquisition interval :** 0.430 sec

**rid1A**  
**Mn :** 5.9474e2 g/mol  
**Mw :** 6.7552e2 g/mol  
**Mz :** 8.3210e2 g/mol  
**Mv :** 0.000000 g/mol  
**D :** 1.1358e0  
**[n] :** 0.000000 ml/g  
**Vp :** 1.8295e1 ml  
**Mp :** 6.1349e2 g/mol  
**A :** 6.5036e3 ml<sup>3</sup>/V  
**< 204 :** 0.00  
**w% :** 100.00  
**> 4915 :** 0.00

Fig S21. GPC curve of prepared oligomer by Run3([Cat]= 5.0 mg, 1-decene=53 mmol, t=90min,

T= 80 °C, Zn/Ti=90, single-stage ).

**Table S1.** Cartesian coordinates and energy data of DFT-optimized structures (selected distances in Å), absolute gas and solvent phase energy values (in a.u.).

| 1                                                                                                                                                                                                                                                                                                                                                                                                                                                                          |                                                                                                                                                                                                                                                                                                                                                                                                                                                                                                                                                                                                                                                                                                                                                                                                                                                                                                                                                                                                                                                                                                                                                                                                                                                                                                                                                                                                                                                                                                                                                                                                                                                                                                                                                                                                                                                                                                                                                                                                                                                                                                                                                                                                                                                                                                                                                                                                                                                                                                                                                                                                                                                                                                                        |
|----------------------------------------------------------------------------------------------------------------------------------------------------------------------------------------------------------------------------------------------------------------------------------------------------------------------------------------------------------------------------------------------------------------------------------------------------------------------------|------------------------------------------------------------------------------------------------------------------------------------------------------------------------------------------------------------------------------------------------------------------------------------------------------------------------------------------------------------------------------------------------------------------------------------------------------------------------------------------------------------------------------------------------------------------------------------------------------------------------------------------------------------------------------------------------------------------------------------------------------------------------------------------------------------------------------------------------------------------------------------------------------------------------------------------------------------------------------------------------------------------------------------------------------------------------------------------------------------------------------------------------------------------------------------------------------------------------------------------------------------------------------------------------------------------------------------------------------------------------------------------------------------------------------------------------------------------------------------------------------------------------------------------------------------------------------------------------------------------------------------------------------------------------------------------------------------------------------------------------------------------------------------------------------------------------------------------------------------------------------------------------------------------------------------------------------------------------------------------------------------------------------------------------------------------------------------------------------------------------------------------------------------------------------------------------------------------------------------------------------------------------------------------------------------------------------------------------------------------------------------------------------------------------------------------------------------------------------------------------------------------------------------------------------------------------------------------------------------------------------------------------------------------------------------------------------------------------|
| 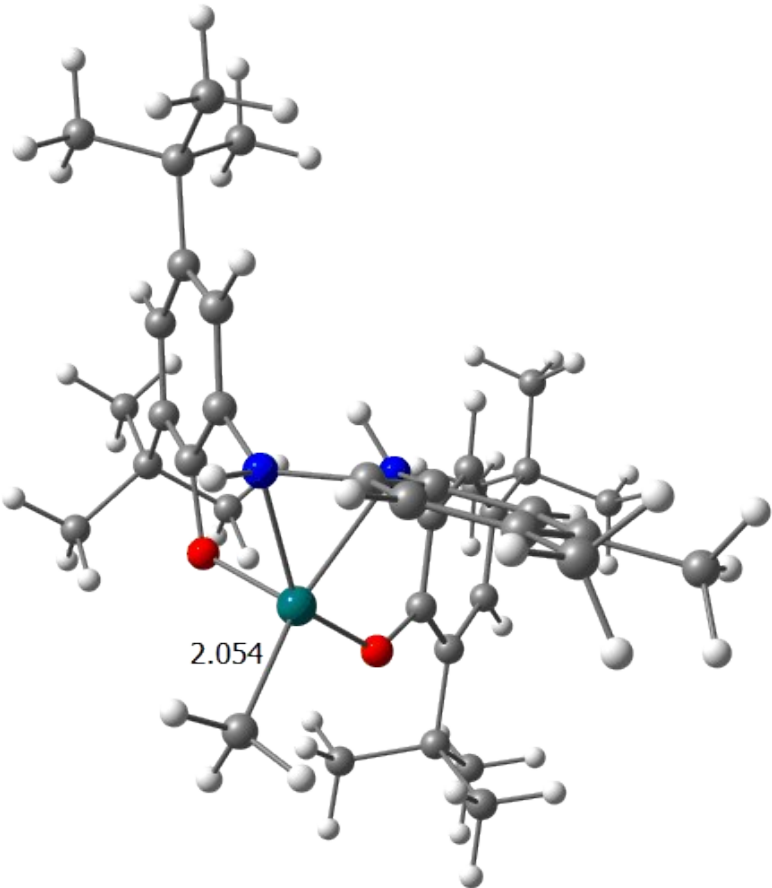                                                                                                                                                                                                                                                                                                                                                                                         | <pre> 95 PhTitBuCH3+ SCF Done: -1759.07280123 A.U. Ti 0.451767 -0.548271 -2.001358 N -0.209889 0.714779 -0.266536 O -1.062006 -1.404645 -1.457207 C -1.952965 -0.916661 -0.543610 C -1.540535 0.247392 0.138335 C -2.295423 0.795520 1.183073 H -1.904227 1.655471 1.741971 C -3.537454 0.215462 1.510798 C -3.949036 -0.924043 0.776506 H -4.917814 -1.372435 1.032528 C -3.193968 -1.536053 -0.243520 C 0.034429 2.090200 -0.706662 C -4.439860 0.774300 2.629533 N 1.938623 1.050089 -1.801698 O 1.965316 -1.606670 -2.088319 C 2.527038 -1.146532 -0.921259 C 2.576494 0.268370 -0.741565 C 3.022287 0.853061 0.453919 H 3.004562 1.948425 0.537991 C 3.469698 0.028875 1.500518 C 3.425434 -1.377641 1.300025 H 3.764080 -2.017673 2.124847 C 2.955099 -2.008427 0.136748 C 1.220535 2.258372 -1.455522 C 3.979252 0.593106 2.838727 C -3.655473 -2.800259 -0.992076 C 2.842121 -3.538206 0.007491 H 0.459114 0.508358 0.502524 H 2.535666 1.166034 -2.634605 H -0.562706 -0.694529 -4.428282 C 3.962957 2.135568 2.858502 H 4.617212 2.567392 2.072819 H 2.938544 2.543450 2.726749 H 4.337064 2.502384 3.835371 C 3.064955 0.073991 3.979820 H 3.069981 -1.032700 4.050177 H 3.410318 0.470992 4.956763 H 2.014763 0.401490 3.828895 C 5.434900 0.109876 3.070844 H 5.821352 0.511852 4.030178 H 5.506424 -0.995577 3.122092 H 6.104817 0.457348 2.257576 C 3.405552 -4.259439 1.250554 H 4.479134 -4.030694 1.414199 H 2.845610 -4.007375 2.175227 H 3.321783 -5.355398 1.107242 C 3.633761 -4.019819 -1.236396 H 3.249481 -3.570322 -2.171662 H 4.709762 -3.766014 -1.140889 H 3.551922 -5.122519 -1.327729 C 1.339310 -3.912247 -0.129551 H 0.752927 -3.530143 0.732165 H 0.892174 -3.509056 -1.057761 H 1.225752 -5.015446 -0.155706 C -2.639511 -3.943970 -0.728629 H -1.624260 -3.683286 -1.084889 H -2.578911 -4.175224 0.355081 H -2.961514 -4.865428 -1.256720 C -3.733711 -2.492605 -2.511113 H -4.454487 -1.672621 -2.710480 H -2.748387 -2.197981 -2.922371 H -4.078348 -3.391631 -3.062985 C -5.047911 -3.269204 -0.520814 H -5.056648 -3.537430 0.556070 H -5.828989 -2.501000 -0.698454 H -5.342331 -4.175731 -1.087130 C -4.649010 -0.319869 3.708563 H -5.296167 0.063803 4.524498 H -5.137867 -1.224734 3.293781 H -3.680873 -0.630170 4.153564 C -5.808415 1.177597 2.021819 H -6.331932 0.313411 1.564964 H -6.472329 1.589190 2.810399 H -5.684215 1.952311 1.236848 C -3.821955 2.015778 3.305545 H -2.849861 1.786454 3.790588 H -3.668620 2.847612 2.585796 H -4.501566 2.390080 4.097580 C -0.134226 0.154022 -3.848139 H 0.677885 0.628668 -4.439603 H -0.943466 0.899044 -3.666775 C -0.794893 3.192013 -0.473394 C 1.584581 3.525150 -1.923661 C 0.762839 4.647422 -1.682940 </pre> |
| <p>Zero-point correction= 0.799441 (Hartree/Particle)</p> <p>Thermal correction to Energy= 0.863744</p> <p>Thermal correction to Enthalpy= 0.864863</p> <p>Thermal correction to Gibbs Free Energy= 0.697404</p> <p>Sum of electronic and zero-point Energies= -1758.273361</p> <p>Sum of electronic and thermal Energies= -1758.209057</p> <p>Sum of electronic and thermal Enthalpies= -1758.207939</p> <p>Sum of electronic and thermal Free Energies= -1758.375397</p> |                                                                                                                                                                                                                                                                                                                                                                                                                                                                                                                                                                                                                                                                                                                                                                                                                                                                                                                                                                                                                                                                                                                                                                                                                                                                                                                                                                                                                                                                                                                                                                                                                                                                                                                                                                                                                                                                                                                                                                                                                                                                                                                                                                                                                                                                                                                                                                                                                                                                                                                                                                                                                                                                                                                        |
| Solvent: -1758.7804031                                                                                                                                                                                                                                                                                                                                                                                                                                                     |                                                                                                                                                                                                                                                                                                                                                                                                                                                                                                                                                                                                                                                                                                                                                                                                                                                                                                                                                                                                                                                                                                                                                                                                                                                                                                                                                                                                                                                                                                                                                                                                                                                                                                                                                                                                                                                                                                                                                                                                                                                                                                                                                                                                                                                                                                                                                                                                                                                                                                                                                                                                                                                                                                                        |



|  |   |           |          |           |
|--|---|-----------|----------|-----------|
|  | C | -0.450631 | 4.473513 | -0.958339 |
|  | H | -1.738021 | 3.057221 | 0.073400  |
|  | H | 2.512698  | 3.640560 | -2.506375 |
|  | C | -1.364533 | 5.647723 | -0.708016 |
|  | H | -1.687710 | 6.117384 | -1.661520 |
|  | H | -2.273343 | 5.353127 | -0.148898 |
|  | H | -0.849601 | 6.442876 | -0.127259 |
|  | C | 1.158396  | 6.007791 | -2.200181 |
|  | H | 0.394513  | 6.409873 | -2.899726 |
|  | H | 1.241294  | 6.744160 | -1.372560 |
|  | H | 2.128082  | 5.983804 | -2.733391 |

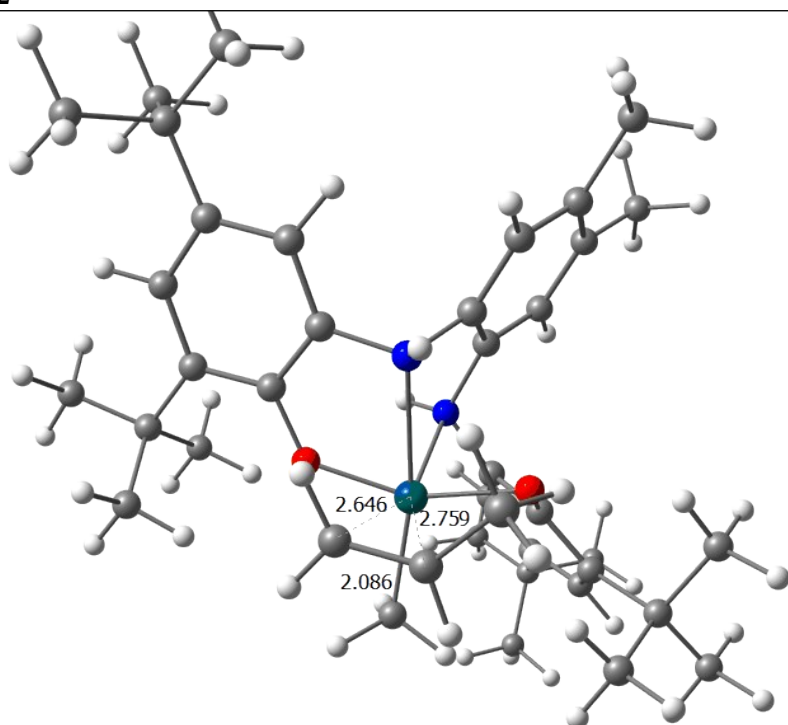

Zero-point correction= 0.878974 (Hartree/Particle)  
 Thermal correction to Energy= 0.950089  
 Thermal correction to Enthalpy= 0.951207  
 Thermal correction to Gibbs Free Energy= 0.769186  
 Sum of electronic and zero-point Energies= -1876.028246  
 Sum of electronic and thermal Energies= -1875.957131  
 Sum of electronic and thermal Enthalpies= -1875.956013  
 Sum of electronic and thermal Free Energies= -1876.138034

Solvent: -1876.5862019

104

PhTitBuCH3+propTS+PRE SCF Done: -1876.90721981 A.U.

|    |           |           |           |
|----|-----------|-----------|-----------|
| Ti | -0.432700 | -0.736111 | -1.073663 |
| N  | -0.491645 | 0.106770  | 0.910979  |
| O  | -1.579746 | 0.796750  | -1.356204 |
| C  | -2.470133 | 0.343927  | -0.445596 |
| C  | -1.912580 | -0.130510 | 0.786067  |
| C  | -2.674902 | -0.826113 | 1.743347  |
| H  | -2.180666 | -1.190741 | 2.654946  |
| C  | -4.042454 | -1.020487 | 1.514560  |
| C  | -4.603695 | -0.450371 | 0.333970  |
| H  | -5.685676 | -0.564729 | 0.186649  |
| C  | -3.883453 | 0.231190  | -0.654659 |
| C  | -0.061144 | 1.504016  | 0.967473  |
| C  | -4.952586 | -1.783323 | 2.494437  |
| N  | 1.327377  | 0.961764  | -0.965826 |
| O  | 1.096378  | -1.656316 | -0.608917 |
| C  | 2.321622  | -1.167618 | -0.310807 |
| C  | 2.503834  | 0.222650  | -0.492469 |
| C  | 3.730072  | 0.838272  | -0.212480 |
| H  | 3.821112  | 1.924346  | -0.350639 |
| C  | 4.813151  | 0.066165  | 0.250687  |
| C  | 4.604417  | -1.326004 | 0.419236  |
| H  | 5.447904  | -1.928328 | 0.781691  |
| C  | 3.390028  | -1.985480 | 0.154645  |
| C  | 0.833881  | 1.943675  | -0.019096 |
| C  | 6.189085  | 0.678381  | 0.580922  |
| C  | -4.548038 | 0.859444  | -1.892086 |
| C  | 3.194030  | -3.500594 | 0.353339  |
| H  | -0.057626 | -0.470704 | 1.646945  |
| H  | 1.546131  | 1.435986  | -1.852993 |
| H  | -1.834728 | -2.842296 | -0.585448 |
| C  | 6.221347  | 2.200053  | 0.327907  |
| H  | 6.024840  | 2.447981  | -0.736233 |
| H  | 5.484104  | 2.741338  | 0.957341  |
| H  | 7.224261  | 2.600999  | 0.578754  |
| C  | 6.508784  | 0.422961  | 2.076973  |
| H  | 6.546718  | -0.659662 | 2.314613  |
| H  | 7.496504  | 0.856688  | 2.338520  |
| H  | 5.743430  | 0.888634  | 2.732065  |
| C  | 7.270736  | 0.008472  | -0.305629 |
| H  | 8.269348  | 0.440405  | -0.086335 |
| H  | 7.335684  | -1.084443 | -0.128355 |
| H  | 7.056514  | 0.165639  | -1.383083 |
| C  | 4.482828  | -4.185974 | 0.853979  |
| H  | 5.319363  | -4.076189 | 0.133150  |
| H  | 4.812899  | -3.789800 | 1.836766  |
| H  | 4.298878  | -5.271948 | 0.982038  |
| C  | 2.793303  | -4.148737 | -0.999038 |
| H  | 1.834657  | -3.743757 | -1.378067 |
| H  | 3.576539  | -3.974108 | -1.765651 |
| H  | 2.675543  | -5.245411 | -0.875378 |
| C  | 2.078639  | -3.736157 | 1.407181  |
| H  | 2.355168  | -3.278982 | 2.380411  |
| H  | 1.110642  | -3.310552 | 1.076050  |
| H  | 1.932096  | -4.823841 | 1.571975  |
| C  | -4.036352 | 0.155187  | -3.174377 |
| H  | -2.938521 | 0.245017  | -3.264327 |
| H  | -4.305469 | -0.921229 | -3.173176 |
| H  | -4.495623 | 0.619036  | -4.071689 |
| C  | -4.183985 | 2.367611  | -1.938536 |
| H  | -4.548262 | 2.888387  | -1.028916 |
| H  | -3.090013 | 2.522363  | -2.013092 |
| H  | -4.662035 | 2.845074  | -2.818947 |
| C  | -6.085057 | 0.730161  | -1.847766 |
| H  | -6.418055 | -0.328522 | -1.858766 |
| H  | -6.518967 | 1.226599  | -0.955110 |
| H  | -6.521701 | 1.218691  | -2.742215 |
| C  | -5.646922 | -2.945966 | 1.737819  |
| H  | -6.299403 | -3.515312 | 2.431597  |
| H  | -6.285566 | -2.583142 | 0.906832  |
| H  | -4.900316 | -3.648059 | 1.312343  |
| C  | -6.021974 | -0.807318 | 3.051456  |
| H  | -6.657069 | -0.381890 | 2.247944  |
| H  | -6.691239 | -1.337827 | 3.760045  |
| H  | -5.546839 | 0.036620  | 3.593302  |
| C  | -4.158412 | -2.373837 | 3.677564  |
| H  | -3.379182 | -3.087676 | 3.337164  |
| H  | -3.672361 | -1.585352 | 4.289396  |
| H  | -4.843142 | -2.929931 | 4.349265  |
| C  | -0.236138 | -0.280523 | -3.787942 |
| C  | 0.805617  | -1.061827 | -3.389353 |
| H  | -1.206386 | -0.774346 | -3.983987 |
| H  | 0.710848  | -2.155848 | -3.316619 |
| H  | 1.816748  | -0.648504 | -3.230588 |
| C  | -0.175176 | 1.190708  | -4.065541 |
| H  | -0.488081 | 1.384141  | -5.113862 |
| H  | -0.882255 | 1.741554  | -3.410769 |
| H  | 0.846558  | 1.603121  | -3.936993 |
| C  | -1.611461 | -2.381532 | -1.578616 |
| H  | -1.089896 | -3.139670 | -2.199663 |

|  |   |           |           |           |
|--|---|-----------|-----------|-----------|
|  | H | -2.577527 | -2.107447 | -2.051477 |
|  | C | -0.587308 | 2.399106  | 1.905451  |
|  | C | 1.193685  | 3.299349  | -0.053623 |
|  | C | 0.679705  | 4.218925  | 0.884258  |
|  | C | -0.222195 | 3.760093  | 1.888613  |
|  | H | -1.314061 | 2.031359  | 2.647658  |
|  | H | 1.885749  | 3.652640  | -0.835554 |
|  | C | -0.790693 | 4.718840  | 2.905552  |
|  | H | -1.343751 | 5.548455  | 2.415259  |
|  | H | -1.485222 | 4.214307  | 3.604615  |
|  | H | 0.013699  | 5.192509  | 3.508206  |
|  | C | 1.078477  | 5.672831  | 0.825527  |
|  | H | 0.191377  | 6.329524  | 0.697444  |
|  | H | 1.570077  | 5.993971  | 1.768819  |
|  | H | 1.776974  | 5.878215  | -0.008499 |

**1 (triplet)**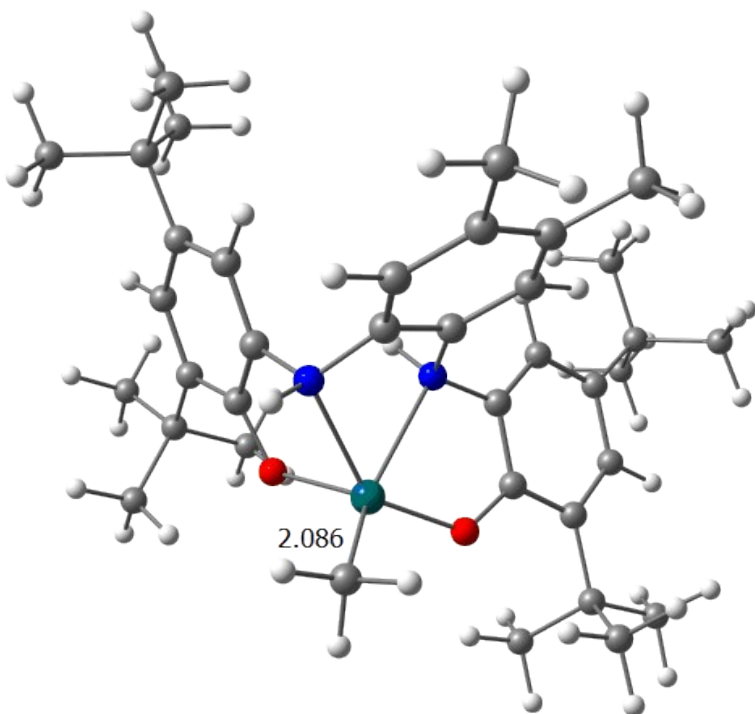

Zero-point correction= 0.796505 (Hartree/Particle)  
 Thermal correction to Energy= 0.861917  
 Thermal correction to Enthalpy= 0.863035  
 Thermal correction to Gibbs Free Energy= 0.690797  
 Sum of electronic and zero-point Energies= -1758.207010  
 Sum of electronic and thermal Energies= -1758.141598  
 Sum of electronic and thermal Enthalpies= -1758.140479  
 Sum of electronic and thermal Free Energies= -1758.312718

Solvent: -1976.7393619

95

PhTitBuCH3+triplet SCF Done: -1759.00351461 A.U.

|    |           |           |           |
|----|-----------|-----------|-----------|
| Ti | -0.057969 | -0.664240 | -2.162226 |
| N  | -0.384592 | 0.412023  | -0.078467 |
| O  | -1.893919 | -0.967511 | -1.717628 |
| C  | -2.501371 | -0.644135 | -0.583114 |
| C  | -1.723460 | 0.077831  | 0.375075  |
| C  | -2.223505 | 0.395009  | 1.634250  |
| H  | -1.577684 | 0.923604  | 2.349116  |
| C  | -3.554934 | 0.036740  | 1.973629  |
| C  | -4.329218 | -0.637636 | 0.991540  |
| H  | -5.361269 | -0.904131 | 1.253017  |
| C  | -3.862810 | -1.000796 | -0.280325 |
| C  | -0.102984 | 1.794814  | -0.446836 |
| C  | -4.171936 | 0.360374  | 3.342026  |
| N  | 1.647074  | 0.759211  | -1.763334 |
| O  | 1.326402  | -1.846420 | -1.375497 |
| C  | 2.333119  | -1.321740 | -0.704013 |
| C  | 2.538315  | 0.096648  | -0.813067 |
| C  | 3.475286  | 0.773705  | -0.041478 |
| H  | 3.559323  | 1.864551  | -0.142877 |
| C  | 4.307660  | 0.042856  | 0.845340  |
| C  | 4.135574  | -1.369918 | 0.907862  |
| H  | 4.788760  | -1.927220 | 1.591746  |
| C  | 3.188271  | -2.091785 | 0.171590  |
| C  | 0.989607  | 1.969988  | -1.324265 |
| C  | 5.385030  | 0.716283  | 1.705825  |
| C  | -4.728047 | -1.753727 | -1.302101 |
| C  | 3.007505  | -3.610945 | 0.305599  |
| H  | 0.316632  | 0.082517  | 0.605947  |
| H  | 2.123034  | 0.906079  | -2.667196 |
| H  | -0.297156 | -1.244781 | -4.654212 |
| C  | 5.400698  | 2.248816  | 1.529212  |
| H  | 5.632146  | 2.545177  | 0.485092  |
| H  | 4.433964  | 2.710077  | 1.820805  |
| H  | 6.184590  | 2.692230  | 2.175533  |
| C  | 5.110308  | 0.393793  | 3.200868  |
| H  | 5.143723  | -0.694679 | 3.408877  |
| H  | 5.880249  | 0.877415  | 3.837002  |
| H  | 4.116137  | 0.773375  | 3.515203  |
| C  | 6.775351  | 0.153691  | 1.300131  |
| H  | 7.567246  | 0.627455  | 1.916511  |
| H  | 6.844744  | -0.942545 | 1.451532  |
| H  | 6.994789  | 0.365785  | 0.233550  |
| C  | 4.050968  | -4.231431 | 1.258202  |
| H  | 5.089363  | -4.065682 | 0.902911  |
| H  | 3.965159  | -3.837382 | 2.292435  |
| H  | 3.893036  | -5.327270 | 1.312765  |
| C  | 3.163110  | -4.275428 | -1.089549 |
| H  | 2.405216  | -3.906541 | -1.806095 |
| H  | 4.171743  | -4.079524 | -1.508528 |
| H  | 3.042085  | -5.374290 | -0.994331 |
| C  | 1.591359  | -3.899687 | 0.879604  |
| H  | 1.467942  | -3.432304 | 1.879273  |
| H  | 0.796101  | -3.522151 | 0.208657  |
| H  | 1.451495  | -4.994080 | 0.998281  |
| C  | -4.079140 | -3.134555 | -1.597960 |
| H  | -3.064553 | -3.026287 | -2.026636 |
| H  | -4.007866 | -3.744154 | -0.673318 |
| H  | -4.703285 | -3.691581 | -2.327026 |
| C  | -4.823101 | -0.918548 | -2.608669 |
| H  | -5.285795 | 0.070724  | -2.411661 |
| H  | -3.828388 | -0.757143 | -3.065946 |
| H  | -5.458516 | -1.451003 | -3.346276 |
| C  | -6.158910 | -1.993121 | -0.775696 |
| H  | -6.170908 | -2.618716 | 0.141061  |
| H  | -6.688888 | -1.041887 | -0.559916 |
| H  | -6.748639 | -2.530170 | -1.545472 |
| C  | -4.621601 | -0.962757 | 4.019873  |
| H  | -5.069225 | -0.745289 | 5.011826  |
| H  | -5.383737 | -1.501690 | 3.421586  |
| H  | -3.760167 | -1.645273 | 4.171092  |
| C  | -5.404855 | 1.281635  | 3.131095  |
| H  | -6.185138 | 0.800135  | 2.507815  |
| H  | -5.864592 | 1.527746  | 4.110782  |
| H  | -5.112772 | 2.232251  | 2.638812  |
| C  | -3.176813 | 1.077763  | 4.277687  |
| H  | -2.282039 | 0.455448  | 4.487987  |
| H  | -2.840526 | 2.050633  | 3.861727  |
| H  | -3.664296 | 1.289961  | 5.250417  |
| C  | 0.089435  | -0.291167 | -4.209365 |
| H  | 1.070486  | -0.081407 | -4.690274 |
| H  | -0.619324 | 0.520668  | -4.496814 |
| C  | -0.856938 | 2.907266  | -0.057814 |
| C  | 1.334851  | 3.251734  | -1.772695 |
| C  | 0.583441  | 4.381695  | -1.384736 |
| C  | -0.531264 | 4.203970  | -0.517038 |
| H  | -1.731482 | 2.769485  | 0.594850  |
| H  | 2.190870  | 3.371202  | -2.456519 |
| C  | -1.365041 | 5.387984  | -0.093116 |
| H  | -1.817296 | 5.898454  | -0.970551 |

|  |   |           |          |           |
|--|---|-----------|----------|-----------|
|  | H | -2.186289 | 5.092372 | 0.587765  |
|  | H | -0.748420 | 6.152055 | 0.427040  |
|  | C | 0.952337  | 5.755282 | -1.888258 |
|  | H | 0.113718  | 6.216416 | -2.452617 |
|  | H | 1.180729  | 6.446022 | -1.048440 |
|  | H | 1.835280  | 5.728421 | -2.555604 |

**1 (without H<sup>+</sup>)**

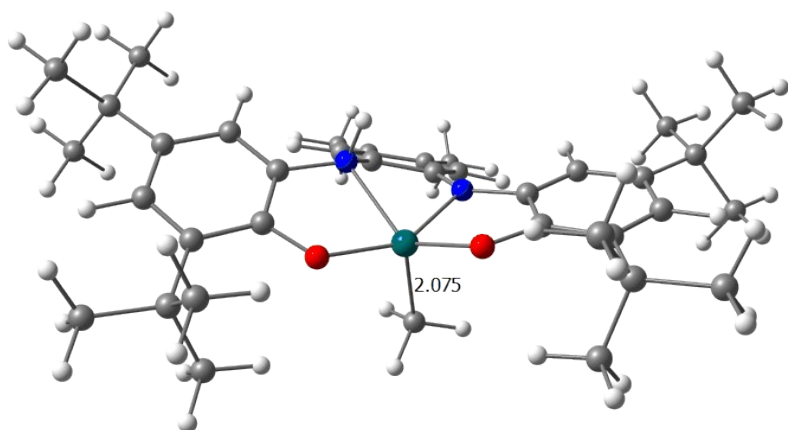

Zero-point correction= 0.786246 (Hartree/Particle)  
 Thermal correction to Energy= 0.850322  
 Thermal correction to Enthalpy= 0.851440  
 Thermal correction to Gibbs Free Energy= 0.684304  
 Sum of electronic and zero-point Energies= -1757.893181  
 Sum of electronic and thermal Energies= -1757.829105  
 Sum of electronic and thermal Enthalpies= -1757.827987  
 Sum of electronic and thermal Free Energies= -1757.995123

Solvent: -1758.3548091

94  
PhTitBuCH3 SCF Done: -1758.67942741 A.U.

|    |           |           |           |
|----|-----------|-----------|-----------|
| Ti | 0.110742  | -0.910024 | -0.515292 |
| N  | -1.194450 | 0.613504  | 0.535788  |
| O  | -1.579899 | -1.742300 | -0.443123 |
| C  | -2.723563 | -1.117761 | -0.079358 |
| C  | -2.581824 | 0.180666  | 0.467190  |
| C  | -3.676797 | 0.893990  | 0.974594  |
| H  | -3.501741 | 1.866174  | 1.453166  |
| C  | -4.970142 | 0.347029  | 0.872961  |
| C  | -5.096247 | -0.930392 | 0.274606  |
| H  | -6.105656 | -1.354402 | 0.186256  |
| C  | -4.017349 | -1.699940 | -0.201609 |
| C  | -0.714120 | 1.885412  | -0.002645 |
| C  | -6.228708 | 1.084042  | 1.376700  |
| N  | 1.281140  | 0.630290  | -0.021118 |
| O  | 1.597333  | -1.863519 | 0.016472  |
| C  | 2.771908  | -1.162668 | 0.153012  |
| C  | 2.619720  | 0.259113  | 0.136913  |
| C  | 3.746248  | 1.085666  | 0.331053  |
| H  | 3.610623  | 2.172027  | 0.366331  |
| C  | 5.020227  | 0.510000  | 0.502314  |
| C  | 5.133713  | -0.899844 | 0.479135  |
| H  | 6.131828  | -1.339893 | 0.603214  |
| C  | 4.035947  | -1.773539 | 0.312405  |
| C  | 0.697642  | 1.879003  | -0.221740 |
| C  | 6.289254  | 1.368531  | 0.701105  |
| C  | -4.195957 | -3.096338 | -0.827319 |
| C  | 4.186749  | -3.308183 | 0.297764  |
| H  | -0.843353 | 0.530271  | 1.508585  |
| H  | 0.014286  | -1.549282 | -3.116965 |
| C  | 5.975859  | 2.879644  | 0.712356  |
| H  | 5.521395  | 3.213346  | -0.243888 |
| H  | 5.285494  | 3.152221  | 1.537643  |
| H  | 6.911329  | 3.459640  | 0.855248  |
| C  | 6.954687  | 1.001820  | 2.052414  |
| H  | 7.251707  | -0.066143 | 2.089320  |
| H  | 7.869528  | 1.611038  | 2.216548  |
| H  | 6.259153  | 1.186549  | 2.897431  |
| C  | 7.280647  | 1.088762  | -0.457681 |
| H  | 8.204983  | 1.694010  | -0.337810 |
| H  | 7.579676  | 0.021384  | -0.495143 |
| H  | 6.823562  | 1.344236  | -1.436379 |
| C  | 5.657268  | -3.746476 | 0.464972  |
| H  | 6.300927  | -3.361134 | -0.353181 |
| H  | 6.084829  | -3.409043 | 1.432210  |
| H  | 5.719555  | -4.854432 | 0.443305  |
| C  | 3.670821  | -3.861039 | -1.056902 |
| H  | 2.606124  | -3.603765 | -1.217726 |
| H  | 4.259696  | -3.443214 | -1.900156 |
| H  | 3.768819  | -4.967437 | -1.083430 |
| C  | 3.365957  | -3.917984 | 1.464173  |
| H  | 3.732165  | -3.537549 | 2.440820  |
| H  | 2.291418  | -3.667102 | 1.374560  |
| H  | 3.465754  | -5.024831 | 1.467075  |
| C  | -3.428793 | -4.141652 | 0.024842  |
| H  | -2.347410 | -3.909592 | 0.069545  |
| H  | -3.824333 | -4.167618 | 1.061892  |
| H  | -3.549195 | -5.155054 | -0.413917 |
| C  | -3.638373 | -3.079196 | -2.275306 |
| H  | -4.189558 | -2.344421 | -2.898833 |
| H  | -2.564274 | -2.810932 | -2.290769 |
| H  | -3.752977 | -4.080606 | -2.742108 |
| C  | -5.679511 | -3.518303 | -0.886699 |
| H  | -6.136166 | -3.581808 | 0.123310  |
| H  | -6.287022 | -2.821132 | -1.501132 |
| H  | -5.759919 | -4.523600 | -1.349325 |
| C  | -6.938825 | 0.218676  | 2.449438  |
| H  | -7.845885 | 0.735482  | 2.829194  |
| H  | -7.258655 | -0.762787 | 2.043333  |
| H  | -6.265016 | 0.024341  | 3.309652  |
| C  | -7.190899 | 1.324180  | 0.184786  |
| H  | -7.509505 | 0.372337  | -0.287169 |
| H  | -8.106817 | 1.853239  | 0.524491  |
| H  | -6.704364 | 1.942183  | -0.598316 |
| C  | -5.886183 | 2.451442  | 2.004850  |
| H  | -5.219504 | 2.346875  | 2.886267  |
| H  | -5.395095 | 3.129732  | 1.275899  |
| H  | -6.814171 | 2.952815  | 2.349561  |
| C  | 0.379722  | -0.659475 | -2.557475 |
| H  | 1.440766  | -0.455043 | -2.815060 |
| H  | -0.240108 | 0.224412  | -2.839742 |
| C  | -1.492173 | 2.998608  | -0.320636 |
| C  | 1.288441  | 3.058489  | -0.726588 |
| C  | 0.512502  | 4.197250  | -1.029448 |
| C  | -0.895515 | 4.170919  | -0.839114 |
| H  | -2.582094 | 2.963356  | -0.182142 |
| H  | 2.364522  | 3.070478  | -0.947041 |
| C  | -1.746307 | 5.370741  | -1.186068 |
| H  | -1.665282 | 5.636308  | -2.263228 |
| H  | -2.817311 | 5.189331  | -0.966637 |

|  |   |           |          |           |
|--|---|-----------|----------|-----------|
|  | H | -1.435233 | 6.275455 | -0.618835 |
|  | C | 1.178719  | 5.435556 | -1.584755 |
|  | H | 0.777670  | 5.699467 | -2.587564 |
|  | H | 0.999381  | 6.319712 | -0.934921 |
|  | H | 2.274358  | 5.304442 | -1.681937 |

**1 (without H<sup>+</sup>) (isomer)**

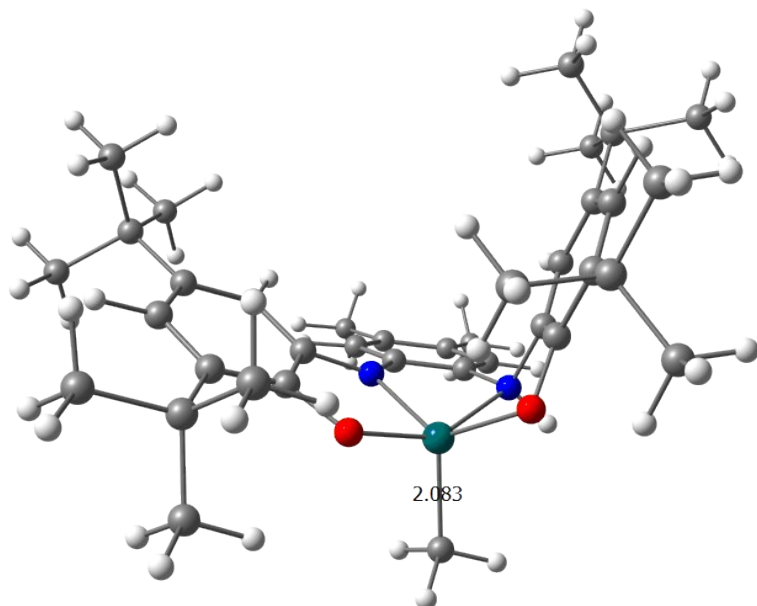

Zero-point correction= 0.786539 (Hartree/Particle)  
 Thermal correction to Energy= 0.850690  
 Thermal correction to Enthalpy= 0.851809  
 Thermal correction to Gibbs Free Energy= 0.684287  
 Sum of electronic and zero-point Energies= -1757.900818  
 Sum of electronic and thermal Energies= -1757.836666  
 Sum of electronic and thermal Enthalpies= -1757.835548  
 Sum of electronic and thermal Free Energies= -1758.003070

Solvent: -1758.3630473

94  
 PhTiBuCH3isomer SCF Done: -1758.68735655 A.U.

|    |           |           |           |
|----|-----------|-----------|-----------|
| Ti | -0.008855 | -0.684349 | -2.133613 |
| N  | -0.666306 | 0.861980  | -1.020203 |
| O  | -1.595217 | -1.378471 | -1.516009 |
| C  | -2.363401 | -0.698735 | -0.609646 |
| C  | -1.836668 | 0.584543  | -0.286235 |
| C  | -2.457920 | 1.349210  | 0.720062  |
| H  | -2.008714 | 2.297623  | 1.031618  |
| C  | -3.629676 | 0.872688  | 1.347452  |
| C  | -4.147802 | -0.381236 | 0.955913  |
| H  | -5.063911 | -0.740222 | 1.443008  |
| C  | -3.535685 | -1.208377 | -0.014594 |
| C  | 0.028359  | 2.070225  | -1.061073 |
| C  | -4.352659 | 1.681685  | 2.448031  |
| N  | 1.788552  | 0.621140  | -1.845898 |
| O  | 1.323202  | -1.956536 | -1.762059 |
| C  | 2.150839  | -1.520377 | -0.769393 |
| C  | 2.435632  | -0.133289 | -0.757756 |
| C  | 3.214204  | 0.459558  | 0.240816  |
| H  | 3.363919  | 1.546983  | 0.213628  |
| C  | 3.761922  | -0.345476 | 1.257420  |
| C  | 3.478386  | -1.733225 | 1.225243  |
| H  | 3.894918  | -2.357864 | 2.027250  |
| C  | 2.675528  | -2.360208 | 0.252556  |
| C  | 1.362514  | 1.974753  | -1.539179 |
| C  | 4.631140  | 0.232332  | 2.393655  |
| C  | -4.087901 | -2.594027 | -0.404398 |
| C  | 2.313013  | -3.856581 | 0.301122  |
| H  | 2.381879  | 0.598000  | -2.690997 |
| H  | -0.874060 | -1.128258 | -4.631040 |
| C  | 4.815156  | 1.758594  | 2.260258  |
| H  | 5.321884  | 2.032438  | 1.311315  |
| H  | 3.845110  | 2.296311  | 2.301908  |
| H  | 5.442251  | 2.138206  | 3.093307  |
| C  | 3.951072  | -0.058317 | 3.756464  |
| H  | 3.832470  | -1.146456 | 3.935628  |
| H  | 4.558462  | 0.354346  | 4.590153  |
| H  | 2.942602  | 0.402807  | 3.800414  |
| C  | 6.030189  | -0.434795 | 2.359539  |
| H  | 6.672374  | -0.034508 | 3.172905  |
| H  | 5.966732  | -1.534125 | 2.493115  |
| H  | 6.537817  | -0.241918 | 1.391473  |
| C  | 2.993132  | -4.577551 | 1.483768  |
| H  | 4.100553  | -4.523985 | 1.423328  |
| H  | 2.676248  | -4.162202 | 2.463165  |
| H  | 2.711592  | -5.650712 | 1.473492  |
| C  | 2.766267  | -4.544779 | -1.012479 |
| H  | 2.281904  | -4.086094 | -1.895750 |
| H  | 3.866970  | -4.467580 | -1.136335 |
| H  | 2.498449  | -5.622660 | -0.990166 |
| C  | 0.775438  | -3.990900 | 0.469776  |
| H  | 0.437881  | -3.506840 | 1.409791  |
| H  | 0.231102  | -3.519836 | -0.370444 |
| H  | 0.484044  | -5.061855 | 0.510157  |
| C  | -3.036669 | -3.680437 | -0.057974 |
| H  | -2.093088 | -3.517582 | -0.612408 |
| H  | -2.803049 | -3.670433 | 1.027153  |
| H  | -3.423072 | -4.689059 | -0.318967 |
| C  | -4.386745 | -2.617579 | -1.926074 |
| H  | -5.147037 | -1.852215 | -2.187964 |
| H  | -3.473392 | -2.415014 | -2.518731 |
| H  | -4.781691 | -3.611996 | -2.225996 |
| C  | -5.393624 | -2.927381 | 0.347475  |
| H  | -5.242836 | -2.964204 | 1.446586  |
| H  | -6.195614 | -2.191059 | 0.131106  |
| H  | -5.761850 | -3.924810 | 0.029067  |
| C  | -4.363749 | 0.861045  | 3.763176  |
| H  | -4.878445 | 1.422480  | 4.572468  |
| H  | -4.889025 | -0.107698 | 3.638296  |
| H  | -3.328571 | 0.641200  | 4.097863  |
| C  | -5.809644 | 1.967777  | 2.002431  |
| H  | -6.381647 | 1.032429  | 1.834971  |
| H  | -6.347636 | 2.556667  | 2.776333  |
| H  | -5.825717 | 2.544834  | 1.054337  |
| C  | -3.663461 | 3.033712  | 2.729813  |
| H  | -2.621306 | 2.900803  | 3.087758  |
| H  | -3.639521 | 3.680935  | 1.828032  |
| H  | -4.217477 | 3.583366  | 3.519161  |
| C  | -0.296957 | -0.300233 | -4.160119 |
| H  | 0.675316  | -0.199330 | -4.695454 |
| H  | -0.875627 | 0.643273  | -4.279633 |
| C  | -0.455786 | 3.370310  | -0.774652 |
| C  | 2.169971  | 3.100971  | -1.713739 |
| C  | 1.685617  | 4.392551  | -1.415096 |
| C  | 0.349531  | 4.515371  | -0.941915 |
| H  | -1.501232 | 3.500913  | -0.465905 |
| H  | 3.198918  | 2.972497  | -2.089786 |
| C  | -0.217193 | 5.882742  | -0.633236 |
| H  | -0.184456 | 6.548392  | -1.523066 |
| H  | -1.269347 | 5.824596  | -0.291595 |



|  |   |          |          |           |
|--|---|----------|----------|-----------|
|  | H | 0.369178 | 6.394865 | 0.160653  |
|  | C | 2.559675 | 5.610431 | -1.601844 |
|  | H | 2.117725 | 6.329216 | -2.326680 |
|  | H | 2.693735 | 6.171625 | -0.650945 |
|  | H | 3.567246 | 5.337624 | -1.974246 |

1--CH<sub>4</sub>

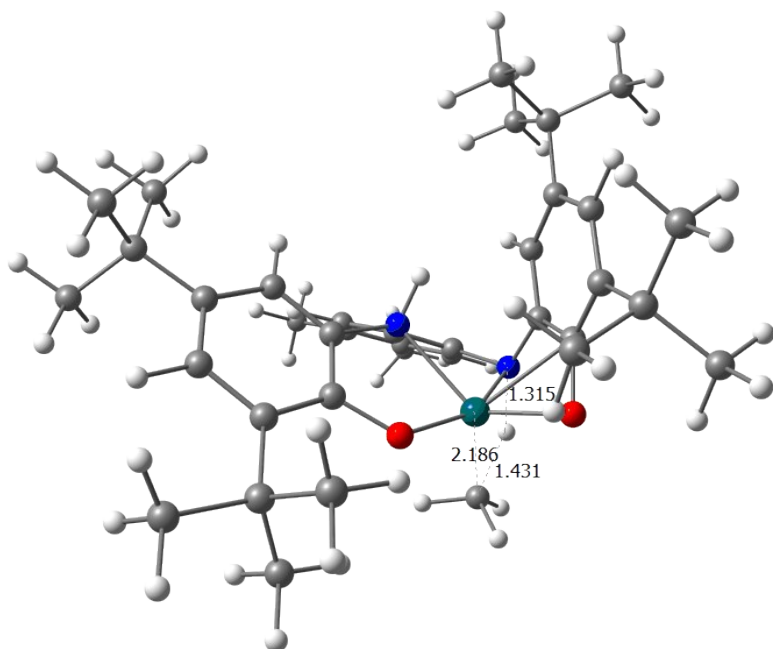

Zero-point correction= 0.794915 (Hartree/Particle)  
 Thermal correction to Energy= 0.858564  
 Thermal correction to Enthalpy= 0.859683  
 Thermal correction to Gibbs Free Energy= 0.693777  
 Sum of electronic and zero-point Energies= -1758.240085  
 Sum of electronic and thermal Energies= -1758.176436  
 Sum of electronic and thermal Enthalpies= -1758.175318  
 Sum of electronic and thermal Free Energies= -1758.341224

Solvent: -1758.7347477

95  
 PhTitBu--CH4 SCF Done: -1759.03500044 A.U.

|    |           |           |           |
|----|-----------|-----------|-----------|
| Ti | 0.602630  | -0.602628 | -1.847175 |
| N  | -0.152718 | 0.671571  | -0.158710 |
| O  | -1.021749 | -1.358719 | -1.499363 |
| C  | -1.926798 | -0.901222 | -0.580638 |
| C  | -1.494695 | 0.198162  | 0.190142  |
| C  | -2.260556 | 0.698712  | 1.250293  |
| H  | -1.858473 | 1.513011  | 1.867751  |
| C  | -3.525150 | 0.134125  | 1.512976  |
| C  | -3.949272 | -0.943314 | 0.696559  |
| H  | -4.932869 | -1.384525 | 0.904191  |
| C  | -3.188241 | -1.506858 | -0.347094 |
| C  | 0.044812  | 2.035522  | -0.675690 |
| C  | -4.437109 | 0.643117  | 2.647231  |
| N  | 1.958511  | 1.036925  | -1.830211 |
| O  | 2.066951  | -1.691154 | -2.052650 |
| C  | 2.581003  | -1.146857 | -0.898791 |
| C  | 2.558030  | 0.292839  | -0.789858 |
| C  | 2.930954  | 0.906222  | 0.435806  |
| H  | 2.888354  | 2.002570  | 0.483111  |
| C  | 3.356952  | 0.136092  | 1.520225  |
| C  | 3.369612  | -1.284532 | 1.377830  |
| H  | 3.692156  | -1.881135 | 2.240141  |
| C  | 2.977368  | -1.959237 | 0.219754  |
| C  | 1.202364  | 2.210398  | -1.475492 |
| C  | 3.785908  | 0.764250  | 2.857774  |
| C  | -3.658755 | -2.717840 | -1.174210 |
| C  | 2.927444  | -3.496296 | 0.129713  |
| H  | 0.483887  | 0.544669  | 0.653989  |
| H  | 1.474728  | 0.615071  | -2.977659 |
| H  | 0.402907  | -0.848835 | -4.319916 |
| C  | 3.713461  | 2.304488  | 2.825216  |
| H  | 4.386311  | 2.735433  | 2.055266  |
| H  | 2.681979  | 2.668610  | 2.633965  |
| H  | 4.028640  | 2.715343  | 3.805348  |
| C  | 2.837741  | 0.248542  | 3.972913  |
| H  | 2.875634  | -0.854354 | 4.081777  |
| H  | 3.123992  | 0.689099  | 4.950239  |
| H  | 1.785328  | 0.535505  | 3.764223  |
| C  | 5.245357  | 0.341406  | 3.170471  |
| H  | 5.572737  | 0.790949  | 4.130552  |
| H  | 5.352616  | -0.758197 | 3.264937  |
| H  | 5.938745  | 0.685098  | 2.375638  |
| C  | 3.457947  | -4.156278 | 1.420663  |
| H  | 4.513366  | -3.881472 | 1.625302  |
| H  | 2.845978  | -3.897218 | 2.309596  |
| H  | 3.421725  | -5.258492 | 1.309491  |
| C  | 3.795237  | -3.987702 | -1.058407 |
| H  | 3.437547  | -3.591127 | -2.027366 |
| H  | 4.853847  | -3.683807 | -0.924345 |
| H  | 3.764001  | -5.095587 | -1.109845 |
| C  | 1.447493  | -3.936533 | -0.060812 |
| H  | 0.805652  | -3.535226 | 0.751556  |
| H  | 1.032357  | -3.604721 | -1.031447 |
| H  | 1.377313  | -5.043334 | -0.032312 |
| C  | -2.675319 | -3.897183 | -0.944244 |
| H  | -1.644779 | -3.641927 | -1.259130 |
| H  | -2.650090 | -4.185422 | 0.127091  |
| H  | -3.002698 | -4.782265 | -1.528294 |
| C  | -3.690372 | -2.333005 | -2.676921 |
| H  | -4.385547 | -1.486001 | -2.852997 |
| H  | -2.687436 | -2.045145 | -3.048434 |
| H  | -4.042068 | -3.194314 | -3.281872 |
| C  | -5.073141 | -3.178368 | -0.763514 |
| H  | -5.115164 | -3.505704 | 0.295977  |
| H  | -5.831849 | -2.382965 | -0.916526 |
| H  | -5.373837 | -4.045182 | -1.386065 |
| C  | -4.679596 | -0.507335 | 3.658593  |
| H  | -5.332504 | -0.159962 | 4.486147  |
| H  | -5.176244 | -1.378831 | 3.185704  |
| H  | -3.723153 | -0.858523 | 4.098584  |
| C  | -5.789626 | 1.103162  | 2.043968  |
| H  | -6.321049 | 0.275590  | 1.531849  |
| H  | -6.458334 | 1.480617  | 2.845415  |
| H  | -5.641228 | 1.919412  | 1.306760  |
| C  | -3.810328 | 1.834107  | 3.401676  |
| H  | -2.851319 | 1.560972  | 3.889872  |
| H  | -3.630378 | 2.701093  | 2.731404  |
| H  | -4.497481 | 2.176425  | 4.201658  |
| C  | 0.458679  | 0.175386  | -3.884947 |
| H  | 1.042775  | 0.794270  | -4.599798 |
| H  | -0.560562 | 0.616303  | -3.818771 |
| C  | -0.813685 | 3.116794  | -0.447020 |
| C  | 1.492185  | 3.472489  | -2.010309 |
| C  | 0.647504  | 4.576578  | -1.769384 |
| C  | -0.529642 | 4.390319  | -0.987555 |
| H  | -1.730161 | 2.973234  | 0.142386  |
| H  | 2.390786  | 3.581635  | -2.636836 |
| C  | -1.470068 | 5.543466  | -0.737919 |
| H  | -1.852454 | 5.965545  | -1.691866 |

|  |   |           |          |           |
|--|---|-----------|----------|-----------|
|  | H | -2.341731 | 5.241941 | -0.125836 |
|  | H | -0.955582 | 6.376740 | -0.212981 |
|  | C | 0.975623  | 5.930291 | -2.348040 |
|  | H | 0.168778  | 6.287484 | -3.023429 |
|  | H | 1.074458  | 6.696069 | -1.549207 |
|  | H | 1.920456  | 5.915467 | -2.924339 |

**1 (without CH<sub>4</sub>)**

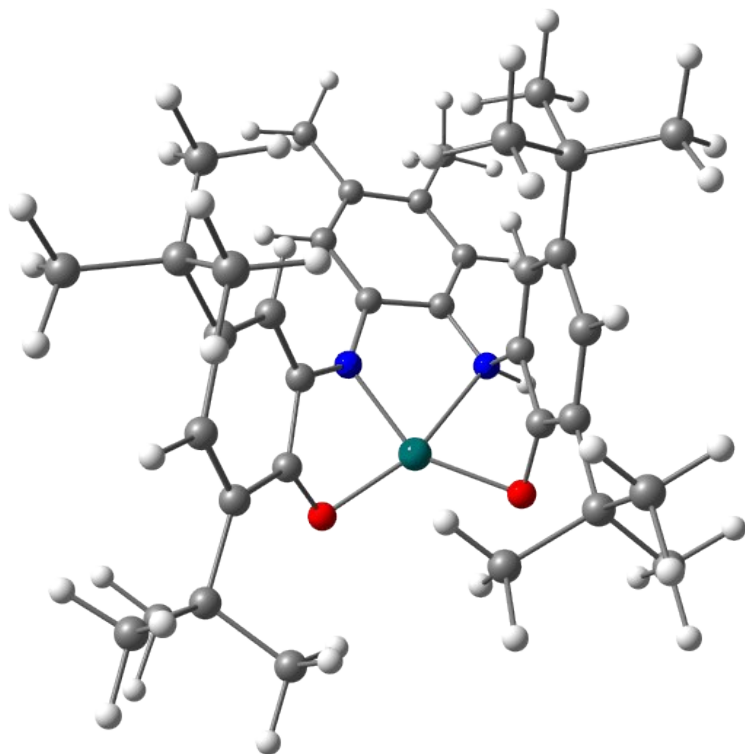

Zero-point correction= 0.754171 (Hartree/Particle)  
 Thermal correction to Energy= 0.814160  
 Thermal correction to Enthalpy= 0.815279  
 Thermal correction to Gibbs Free Energy= 0.658739  
 Sum of electronic and zero-point Energies= -1717.819085  
 Sum of electronic and thermal Energies= -1717.759096  
 Sum of electronic and thermal Enthalpies= -1717.757977  
 Sum of electronic and thermal Free Energies= -1717.914517

Solvent: -1718.2917541

| 90                |                     |                     |
|-------------------|---------------------|---------------------|
| PhTitBu SCF Done: | -1718.57325587 A.U. |                     |
| Ti                | 0.375295            | -0.043625 2.094166  |
| N                 | -1.841717           | -0.565519 2.263685  |
| O                 | 0.430783            | -1.869409 2.573243  |
| C                 | -0.186711           | -2.140774 1.386977  |
| C                 | -1.418628           | -1.446015 1.168128  |
| C                 | -2.104517           | -1.526916 -0.056626 |
| H                 | -3.033868           | -0.956320 -0.174800 |
| C                 | -1.577134           | -2.310192 -1.092485 |
| C                 | -0.357588           | -3.002287 -0.855400 |
| H                 | 0.049272            | -3.609564 -1.674252 |
| C                 | 0.375900            | -2.941766 0.337206  |
| C                 | -2.692631           | 0.517280 1.823485   |
| C                 | -2.252980           | -2.412732 -2.471328 |
| N                 | -0.609275           | 1.399717 1.273259   |
| O                 | 1.724664            | 1.180143 2.401999   |
| C                 | 1.754974            | 1.445621 1.061310   |
| C                 | 0.455271            | 1.617315 0.416374   |
| C                 | 0.371482            | 1.792332 -0.991867  |
| H                 | -0.627617           | 1.864639 -1.439684  |
| C                 | 1.536819            | 1.849623 -1.752733  |
| C                 | 2.799337            | 1.751802 -1.082345  |
| H                 | 3.703789            | 1.844386 -1.696711  |
| C                 | 2.963296            | 1.565030 0.291196   |
| C                 | -1.982384           | 1.534672 1.136758   |
| C                 | 1.515678            | 1.995688 -3.284901  |
| C                 | 1.728615            | -3.647503 0.522039  |
| C                 | 4.338058            | 1.606773 0.985104   |
| H                 | -2.202937           | -1.094092 3.073811  |
| C                 | 0.086798            | 2.199498 -3.829006  |
| H                 | -0.571931           | 1.333940 -3.607904  |
| H                 | -0.385842           | 3.114676 -3.415739  |
| H                 | 0.116901            | 2.310874 -4.931600  |
| C                 | 2.375591            | 3.217244 -3.702412  |
| H                 | 3.438645            | 3.108015 -3.407266  |
| H                 | 2.352167            | 3.337002 -4.805044  |
| H                 | 1.988398            | 4.151632 -3.246438  |
| C                 | 2.105595            | 0.699804 -3.902678  |
| H                 | 2.107619            | 0.770841 -5.010198  |
| H                 | 3.150812            | 0.522726 -3.576086  |
| H                 | 1.502605            | -0.186500 -3.614994 |
| C                 | 5.477934            | 1.839388 -0.028935  |
| H                 | 5.545772            | 1.022253 -0.777178  |
| H                 | 5.369036            | 2.803527 -0.567206  |
| H                 | 6.446269            | 1.871888 0.509604   |
| C                 | 4.620208            | 0.277296 1.729938   |
| H                 | 3.839787            | 0.045623 2.479529   |
| H                 | 4.691862            | -0.566851 1.016031  |
| H                 | 5.589078            | 0.350055 2.265490   |
| C                 | 4.334742            | 2.787851 1.995100   |
| H                 | 4.122311            | 3.748120 1.481119   |
| H                 | 3.583293            | 2.645074 2.795624   |
| H                 | 5.331728            | 2.871412 2.475004   |
| C                 | 1.665673            | -4.588103 1.753609  |
| H                 | 1.424792            | -4.035542 2.682069  |
| H                 | 0.901534            | -5.379055 1.606529  |
| H                 | 2.646872            | -5.086089 1.896303  |
| C                 | 2.817287            | -2.560546 0.731041  |
| H                 | 2.806489            | -1.819403 -0.096555 |
| H                 | 2.681741            | -2.022417 1.688728  |
| H                 | 3.823771            | -3.026445 0.760888  |
| C                 | 2.112741            | -4.483990 -0.716594 |
| H                 | 1.366090            | -5.275970 -0.932034 |
| H                 | 2.237154            | -3.857861 -1.624611 |
| H                 | 3.082197            | -4.988761 -0.531672 |
| C                 | -2.609999           | -3.895364 -2.753477 |
| H                 | -3.100082           | -3.986782 -3.744796 |
| H                 | -1.712468           | -4.546890 -2.765356 |
| H                 | -3.308111           | -4.289853 -1.986796 |
| C                 | -1.262519           | -1.895829 -3.547875 |
| H                 | -0.334739           | -2.501712 -3.592187 |
| H                 | -1.732586           | -1.935135 -4.552121 |
| H                 | -0.971758           | -0.844194 -3.344825 |
| C                 | -3.542020           | -1.568648 -2.546701 |
| H                 | -4.303469           | -1.906052 -1.813167 |
| H                 | -3.343130           | -0.489935 -2.374008 |
| H                 | -3.993990           | -1.663166 -3.554528 |
| C                 | -4.083904           | 0.559728 1.930945   |
| C                 | -2.696848           | 2.574241 0.511873   |
| C                 | -4.102645           | 2.626101 0.606593   |
| C                 | -4.806623           | 1.619813 1.337981   |
| H                 | -4.621469           | -0.243977 2.459350  |
| H                 | -2.147240           | 3.371824 -0.010532  |
| C                 | -6.308439           | 1.680896 1.465994   |
| H                 | -6.804153           | 1.677208 0.471477   |
| H                 | -6.709065           | 0.829367 2.049025   |
| H                 | -6.630722           | 2.617581 1.969762   |
| C                 | -4.862973           | 3.756427 -0.043425  |
| H                 | -5.611824           | 3.374828 -0.769982  |
| H                 | -5.430490           | 4.344655 0.709192   |

|  |   |           |          |           |
|--|---|-----------|----------|-----------|
|  | H | -4.190346 | 4.452374 | -0.580619 |
|--|---|-----------|----------|-----------|

2-3

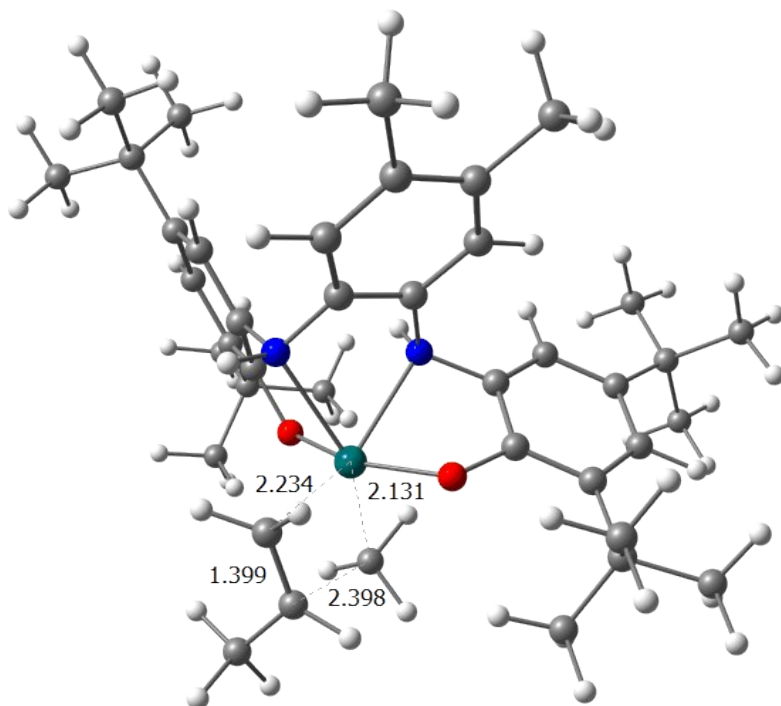

Zero-point correction= 0.880691 (Hartree/Particle)  
 Thermal correction to Energy= 0.949735  
 Thermal correction to Enthalpy= 0.950853  
 Thermal correction to Gibbs Free Energy= 0.773694  
 Sum of electronic and zero-point Energies= -1876.021806  
 Sum of electronic and thermal Energies= -1875.952761  
 Sum of electronic and thermal Enthalpies= -1875.951643  
 Sum of electronic and thermal Free Energies= -1876.128802

Solvent: -1876.5831899

104  
PhTitBuCH3+propTIsomer+ SCF Done: -1876.90249642  
A.U.

|    |           |           |           |
|----|-----------|-----------|-----------|
| Ti | -0.133716 | -1.237464 | -1.324708 |
| N  | -0.339251 | 0.332847  | 0.324088  |
| O  | -1.862094 | -0.529451 | -1.520081 |
| C  | -2.551642 | -0.196877 | -0.392400 |
| C  | -1.737640 | 0.186343  | 0.699790  |
| C  | -2.260782 | 0.444630  | 1.970031  |
| H  | -1.581156 | 0.736511  | 2.783069  |
| C  | -3.653668 | 0.337011  | 2.168422  |
| C  | -4.454829 | -0.000597 | 1.049614  |
| H  | -5.539712 | -0.065760 | 1.204751  |
| C  | -3.959673 | -0.275143 | -0.242902 |
| C  | -0.061017 | 1.614664  | -0.337052 |
| C  | -4.317380 | 0.582630  | 3.538330  |
| N  | 1.526407  | 0.353642  | -1.690903 |
| O  | 1.306622  | -1.889502 | -0.333373 |
| C  | 2.400949  | -1.162039 | -0.003951 |
| C  | 2.598261  | 0.030090  | -0.729664 |
| C  | 3.697754  | 0.866727  | -0.506823 |
| H  | 3.788259  | 1.795129  | -1.087816 |
| C  | 4.646932  | 0.511126  | 0.470999  |
| C  | 4.417867  | -0.678706 | 1.208018  |
| H  | 5.146771  | -0.943881 | 1.985094  |
| C  | 3.316474  | -1.535675 | 1.019220  |
| C  | 0.860222  | 1.609677  | -1.398445 |
| C  | 5.890303  | 1.372496  | 0.771817  |
| C  | -4.868709 | -0.641915 | -1.430148 |
| C  | 3.067814  | -2.793843 | 1.873145  |
| H  | 0.302222  | 0.175042  | 1.118998  |
| H  | 1.921095  | 0.396909  | -2.641648 |
| H  | -1.184367 | -2.607821 | -0.111621 |
| C  | 5.969168  | 2.611881  | -0.143310 |
| H  | 6.034227  | 2.330998  | -1.215373 |
| H  | 5.096731  | 3.285034  | -0.007872 |
| H  | 6.877531  | 3.200445  | 0.097559  |
| C  | 5.830332  | 1.852548  | 2.245203  |
| H  | 5.820046  | 1.003914  | 2.959374  |
| H  | 6.716415  | 2.477302  | 2.483430  |
| H  | 4.920512  | 2.461750  | 2.427370  |
| C  | 7.165853  | 0.518738  | 0.551559  |
| H  | 8.073914  | 1.123801  | 0.755093  |
| H  | 7.198420  | -0.364133 | 1.222205  |
| H  | 7.223827  | 0.152278  | -0.494353 |
| C  | 4.169017  | -2.997503 | 2.934191  |
| H  | 5.168543  | -3.138548 | 2.473491  |
| H  | 4.226614  | -2.146151 | 3.643758  |
| H  | 3.948235  | -3.907675 | 3.527960  |
| C  | 3.033271  | -4.046202 | 0.958227  |
| H  | 2.229729  | -3.971769 | 0.199799  |
| H  | 4.000784  | -4.174175 | 0.430105  |
| H  | 2.853276  | -4.957386 | 1.566282  |
| C  | 1.708805  | -2.635833 | 2.608452  |
| H  | 1.721835  | -1.743897 | 3.270045  |
| H  | 0.868601  | -2.535962 | 1.892563  |
| H  | 1.509805  | -3.524277 | 3.243328  |
| C  | -4.498067 | -2.055155 | -1.952576 |
| H  | -3.456581 | -2.078466 | -2.327488 |
| H  | -4.601215 | -2.815450 | -1.150405 |
| H  | -5.171441 | -2.343241 | -2.786501 |
| C  | -4.662413 | 0.404549  | -2.557073 |
| H  | -4.937241 | 1.420271  | -2.204805 |
| H  | -3.609421 | 0.429103  | -2.900957 |
| H  | -5.305045 | 0.159619  | -3.428559 |
| C  | -6.359902 | -0.647993 | -1.034642 |
| H  | -6.581210 | -1.402570 | -0.251496 |
| H  | -6.697161 | 0.344413  | -0.670351 |
| H  | -6.977509 | -0.900815 | -1.920196 |
| C  | -5.055961 | -0.707603 | 3.979765  |
| H  | -5.539611 | -0.555445 | 4.967174  |
| H  | -5.849098 | -0.998951 | 3.261345  |
| H  | -4.349557 | -1.558829 | 4.069796  |
| C  | -5.330882 | 1.749404  | 3.413617  |
| H  | -6.135246 | 1.528180  | 2.682596  |
| H  | -5.816016 | 1.943680  | 4.392761  |
| H  | -4.824895 | 2.682516  | 3.089327  |
| C  | -3.283552 | 0.948462  | 4.623876  |
| H  | -2.539220 | 0.139395  | 4.778687  |
| H  | -2.739224 | 1.885411  | 4.381500  |
| H  | -3.797096 | 1.110354  | 5.593174  |
| C  | -0.399649 | -2.826127 | -3.369425 |
| C  | 0.324090  | -1.634070 | -3.474865 |
| H  | -1.486256 | -2.774867 | -3.557456 |

|  |   |           |           |           |
|--|---|-----------|-----------|-----------|
|  | H | 1.421454  | -1.692526 | -3.585479 |
|  | H | -0.179772 | -0.726486 | -3.858723 |
|  | C | 0.245714  | -4.177663 | -3.487683 |
|  | H | 0.353183  | -4.400588 | -4.572843 |
|  | H | 1.258469  | -4.191028 | -3.037921 |
|  | H | -0.364385 | -4.988627 | -3.047286 |
|  | C | -0.973514 | -3.179255 | -1.067661 |
|  | H | -0.247586 | -3.977847 | -0.833410 |
|  | H | -1.944422 | -3.570175 | -1.418391 |
|  | C | -0.740065 | 2.798286  | -0.018660 |
|  | C | 1.097370  | 2.785391  | -2.126071 |
|  | C | 0.419785  | 3.981890  | -1.816661 |
|  | C | -0.509853 | 3.989097  | -0.736180 |
|  | H | -1.482413 | 2.786152  | 0.793772  |
|  | H | 1.821796  | 2.767820  | -2.957075 |
|  | C | -1.250970 | 5.252507  | -0.372979 |
|  | H | -1.863701 | 5.620243  | -1.223976 |
|  | H | -1.926595 | 5.100012  | 0.490499  |
|  | H | -0.548520 | 6.073989  | -0.115942 |
|  | C | 0.676087  | 5.236440  | -2.613880 |
|  | H | -0.260738 | 5.622944  | -3.068993 |
|  | H | 1.067700  | 6.050963  | -1.967387 |
|  | H | 1.406462  | 5.069234  | -3.429011 |

3

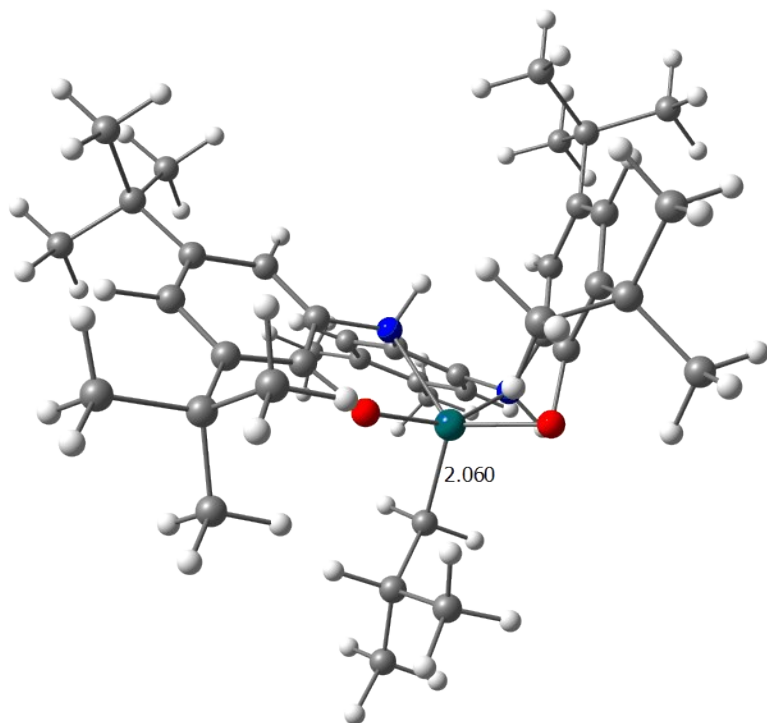

Zero-point correction= 0.882636 (Hartree/Particle)  
 Thermal correction to Energy= 0.952295  
 Thermal correction to Enthalpy= 0.953413  
 Thermal correction to Gibbs Free Energy= 0.774574  
 Sum of electronic and zero-point Energies= -1876.054860  
 Sum of electronic and thermal Energies= -1875.985201  
 Sum of electronic and thermal Enthalpies= -1875.984083  
 Sum of electronic and thermal Free Energies= -1876.162922

Solvent: -1876.6235381

104

PhTitBuCH3+propTIsomer+POST SCF Done: -  
1876.93749578 A.U.

|    |           |           |           |
|----|-----------|-----------|-----------|
| Ti | 0.384763  | 0.828374  | 1.537070  |
| N  | -0.161448 | -0.811989 | 0.100766  |
| O  | -1.090792 | 1.514543  | 0.702670  |
| C  | -1.904478 | 0.823440  | -0.147015 |
| C  | -1.456166 | -0.468020 | -0.496504 |
| C  | -2.135202 | -1.256373 | -1.434166 |
| H  | -1.712798 | -2.223572 | -1.736325 |
| C  | -3.338803 | -0.779540 | -1.990619 |
| C  | -3.782037 | 0.507555  | -1.598963 |
| H  | -4.714639 | 0.881132  | -2.041761 |
| C  | -3.098291 | 1.353720  | -0.703298 |
| C  | 0.050362  | -2.045191 | 0.859405  |
| C  | -4.162845 | -1.599376 | -3.003694 |
| N  | 1.885902  | -0.758032 | 1.795142  |
| O  | 1.906639  | 1.890000  | 1.504406  |
| C  | 2.541522  | 1.199183  | 0.503392  |
| C  | 2.589204  | -0.221349 | 0.630102  |
| C  | 3.103370  | -1.044961 | -0.383948 |
| H  | 3.082773  | -2.133537 | -0.234485 |
| C  | 3.621212  | -0.458456 | -1.551511 |
| C  | 3.584146  | 0.958830  | -1.652718 |
| H  | 3.983187  | 1.410973  | -2.569603 |
| C  | 3.049765  | 1.819694  | -0.680311 |
| C  | 1.190852  | -2.022656 | 1.693418  |
| C  | 4.205677  | -1.290374 | -2.707657 |
| C  | -3.574382 | 2.780001  | -0.367406 |
| C  | 2.956810  | 3.344009  | -0.877166 |
| H  | 0.562126  | -0.775194 | -0.645098 |
| H  | 2.429144  | -0.671999 | 2.667518  |
| H  | -0.348426 | 3.227701  | 2.665046  |
| C  | 4.146867  | -2.804142 | -2.416897 |
| H  | 4.735974  | -3.078471 | -1.517138 |
| H  | 3.104644  | -3.161012 | -2.276797 |
| H  | 4.572949  | -3.366962 | -3.271657 |
| C  | 3.389927  | -1.002979 | -3.995765 |
| H  | 3.432306  | 0.065717  | -4.289081 |
| H  | 3.792318  | -1.595858 | -4.843118 |
| H  | 2.322562  | -1.277944 | -3.861995 |
| C  | 5.686888  | -0.883947 | -2.923767 |
| H  | 6.127826  | -1.477417 | -3.751180 |
| H  | 5.791479  | 0.187372  | -3.190390 |
| H  | 6.288016  | -1.067802 | -2.009571 |
| C  | 3.601050  | 3.788427  | -2.207733 |
| H  | 4.677479  | 3.523432  | -2.259227 |
| H  | 3.087286  | 3.353621  | -3.090397 |
| H  | 3.529542  | 4.890965  | -2.299282 |
| C  | 3.687549  | 4.065746  | 0.285417  |
| H  | 3.243970  | 3.818628  | 1.268846  |
| H  | 4.762701  | 3.791968  | 0.305545  |
| H  | 3.619257  | 5.164374  | 0.145291  |
| C  | 1.457561  | 3.752797  | -0.905338 |
| H  | 0.907282  | 3.203849  | -1.697844 |
| H  | 0.956725  | 3.558577  | 0.061808  |
| H  | 1.366163  | 4.837810  | -1.117533 |
| C  | -2.501046 | 3.789496  | -0.856177 |
| H  | -1.525439 | 3.619632  | -0.360849 |
| H  | -2.353270 | 3.708335  | -1.953080 |
| H  | -2.824421 | 4.827013  | -0.630601 |
| C  | -3.771790 | 2.920796  | 1.163974  |
| H  | -4.507154 | 2.179817  | 1.540534  |
| H  | -2.820673 | 2.779411  | 1.711217  |
| H  | -4.153580 | 3.934371  | 1.405527  |
| C  | -4.911656 | 3.115067  | -1.060426 |
| H  | -4.831517 | 3.076926  | -2.166598 |
| H  | -5.727140 | 2.432176  | -0.743354 |
| H  | -5.219593 | 4.145393  | -0.790114 |
| C  | -4.250758 | -0.817992 | -4.340098 |
| H  | -4.844218 | -1.390647 | -5.082929 |
| H  | -4.740356 | 0.168753  | -4.212315 |
| H  | -3.241025 | -0.643428 | -4.766262 |
| C  | -5.587656 | -1.823257 | -2.433785 |
| H  | -6.121131 | -0.867154 | -2.257202 |
| H  | -6.197603 | -2.416928 | -3.146072 |
| H  | -5.550222 | -2.372734 | -1.470222 |
| C  | -3.528515 | -2.977947 | -3.283927 |
| H  | -2.515260 | -2.888428 | -3.728974 |
| H  | -3.455380 | -3.596227 | -2.364167 |
| H  | -4.153735 | -3.539744 | -4.007038 |
| C  | -1.208866 | 1.626265  | 3.946228  |
| C  | -0.312907 | 0.476160  | 3.443250  |
| H  | -2.135923 | 1.616210  | 3.330732  |
| H  | 0.566999  | 0.333207  | 4.116721  |
| H  | -0.858540 | -0.497372 | 3.385874  |
| C  | -1.608325 | 1.420557  | 5.418960  |
| H  | -2.114265 | 0.444347  | 5.568221  |
| H  | -0.713523 | 1.443741  | 6.077807  |
| H  | -2.300198 | 2.219560  | 5.760318  |
| C  | -0.519118 | 2.990391  | 3.740351  |



|  |   |           |           |          |
|--|---|-----------|-----------|----------|
|  | H | 0.466494  | 3.021260  | 4.252254 |
|  | H | -1.136830 | 3.819438  | 4.142325 |
|  | C | -0.775113 | -3.173581 | 0.852068 |
|  | C | 1.515221  | -3.137795 | 2.472734 |
|  | C | 0.697593  | -4.288775 | 2.462988 |
|  | C | -0.470745 | -4.299578 | 1.649774 |
|  | H | -1.687030 | -3.177893 | 0.239396 |
|  | H | 2.406671  | -3.104706 | 3.119756 |
|  | C | -1.380931 | -5.502936 | 1.637959 |
|  | H | -1.771947 | -5.723203 | 2.654377 |
|  | H | -2.247355 | -5.359412 | 0.964123 |
|  | H | -0.839527 | -6.415318 | 1.307770 |
|  | C | 1.050240  | -5.483011 | 3.313940 |
|  | H | 0.238303  | -5.717515 | 4.035124 |
|  | H | 1.187221  | -6.393386 | 2.691935 |
|  | H | 1.981457  | -5.321653 | 3.890266 |

4 (isomer)

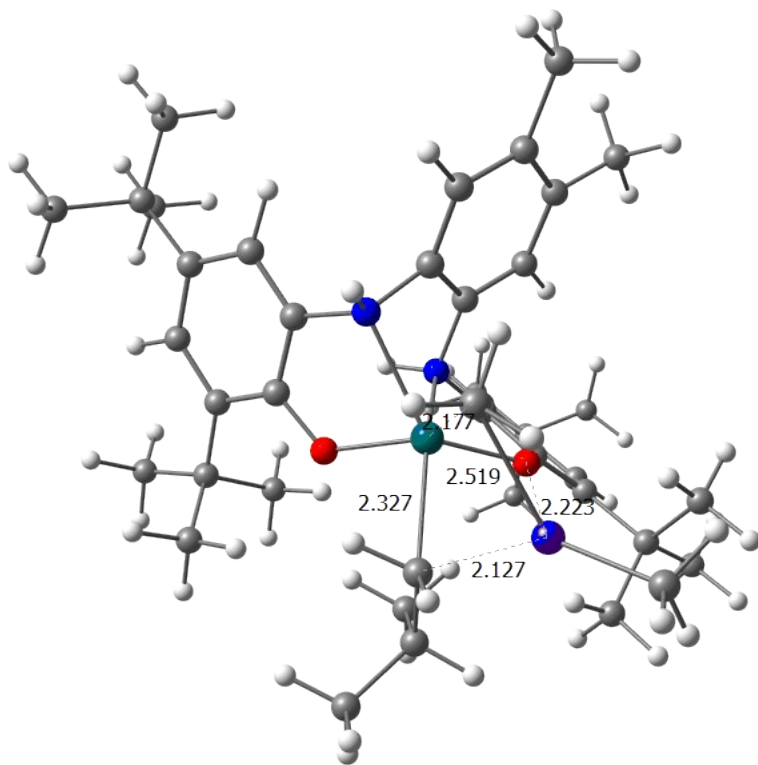

Zero-point correction= 0.954314 (Hartree/Particle)  
 Thermal correction to Energy= 1.032521  
 Thermal correction to Enthalpy= 1.033640  
 Thermal correction to Gibbs Free Energy= 0.837312  
 Sum of electronic and zero-point Energies= -3735.169392  
 Sum of electronic and thermal Energies= -3735.091185  
 Sum of electronic and thermal Enthalpies= -3735.090066  
 Sum of electronic and thermal Free Energies= -3735.286394

Solvent: -3735.5275297

113  
 PhTi(tBu)CH<sub>3</sub>+propTS+POST--ZnMe<sub>2</sub>min0isomer SCF Done:  
 -3736.12370594 A.U.

|    |           |           |           |
|----|-----------|-----------|-----------|
| Ti | -0.152051 | -1.205246 | -1.019760 |
| N  | 0.205101  | 0.803350  | 0.007905  |
| O  | -1.885134 | -0.415380 | -0.772289 |
| C  | -2.152167 | 0.491054  | 0.229285  |
| C  | -0.999894 | 1.129075  | 0.736667  |
| C  | -1.039784 | 2.019820  | 1.812816  |
| H  | -0.103563 | 2.480373  | 2.157961  |
| C  | -2.279965 | 2.308026  | 2.416302  |
| C  | -3.428196 | 1.696401  | 1.861791  |
| H  | -4.397466 | 1.937109  | 2.316318  |
| C  | -3.426704 | 0.790201  | 0.778497  |
| C  | 0.461720  | 1.617787  | -1.175103 |
| C  | -2.419887 | 3.251011  | 3.627486  |
| N  | 1.786901  | -0.285536 | -1.876407 |
| O  | 1.199079  | -1.766174 | 0.152707  |
| C  | 2.435502  | -1.212921 | 0.245091  |
| C  | 2.819568  | -0.400615 | -0.840311 |
| C  | 4.055722  | 0.253513  | -0.895647 |
| H  | 4.285010  | 0.887036  | -1.764196 |
| C  | 4.963226  | 0.087733  | 0.168318  |
| C  | 4.550050  | -0.713358 | 1.263393  |
| H  | 5.247520  | -0.821986 | 2.104413  |
| C  | 3.304671  | -1.363664 | 1.361285  |
| C  | 1.304161  | 1.048977  | -2.151623 |
| C  | 6.358954  | 0.742435  | 0.185806  |
| C  | -4.730225 | 0.168765  | 0.242342  |
| C  | 2.848590  | -2.124249 | 2.618943  |
| H  | 1.038777  | 0.762501  | 0.620543  |
| H  | 2.099336  | -0.740158 | -2.747622 |
| H  | -1.878067 | -1.807963 | 1.405473  |
| C  | 6.606999  | 1.604270  | -1.069393 |
| H  | 6.561187  | 1.003316  | -2.001711 |
| H  | 5.877853  | 2.437683  | -1.151713 |
| H  | 7.618352  | 2.056449  | -1.021504 |
| C  | 6.485286  | 1.650345  | 1.436313  |
| H  | 6.372931  | 1.078890  | 2.380242  |
| H  | 7.483174  | 2.135640  | 1.460229  |
| H  | 5.714309  | 2.448765  | 1.427512  |
| C  | 7.435191  | -0.372888 | 0.239240  |
| H  | 8.451828  | 0.072628  | 0.251054  |
| H  | 7.335771  | -1.001654 | 1.147740  |
| H  | 7.361552  | -1.039830 | -0.644655 |
| C  | 3.962208  | -2.212390 | 3.683213  |
| H  | 4.853168  | -2.754876 | 3.304742  |
| H  | 4.285436  | -1.212103 | 4.038410  |
| H  | 3.585674  | -2.767838 | 4.566170  |
| C  | 2.424158  | -3.567614 | 2.244174  |
| H  | 1.618570  | -3.574385 | 1.485793  |
| C  | 3.285568  | -4.134940 | 1.835385  |
| C  | 2.056435  | -4.104227 | 3.143358  |
| H  | 1.652608  | -1.341819 | 3.228972  |
| H  | 1.974353  | -0.330817 | 3.555888  |
| H  | 0.823807  | -1.223914 | 2.502844  |
| H  | 1.250126  | -1.874792 | 4.115458  |
| C  | -4.707964 | -1.355715 | 0.508949  |
| H  | -3.847941 | -1.848420 | 0.016632  |
| H  | -4.632711 | -1.569095 | 1.594449  |
| H  | -5.628038 | -1.836017 | 0.118093  |
| C  | -4.849297 | 0.473447  | -1.272701 |
| H  | -4.923966 | 1.567215  | -1.442942 |
| H  | -3.979783 | 0.097180  | -1.842762 |
| H  | -5.757250 | -0.004779 | -1.693339 |
| C  | -5.982803 | 0.745010  | 0.938315  |
| H  | -6.000844 | 0.523767  | 2.025278  |
| H  | -6.066700 | 1.842756  | 0.800575  |
| H  | -6.890351 | 0.286094  | 0.496331  |
| C  | -3.020218 | 2.455618  | 4.816046  |
| H  | -3.131663 | 3.114253  | 5.702540  |
| H  | -4.022994 | 2.045681  | 4.577629  |
| H  | -2.363844 | 1.606525  | 5.098682  |
| C  | -3.360613 | 4.426347  | 3.257044  |
| H  | -4.377093 | 4.077077  | 2.983597  |
| H  | -3.467849 | 5.117852  | 4.118354  |
| H  | -2.957131 | 5.004488  | 2.399908  |
| C  | -1.059251 | 3.831772  | 4.065257  |
| H  | -0.346518 | 3.036458  | 4.368425  |
| H  | -0.588880 | 4.438973  | 3.263492  |
| H  | -1.198482 | 4.497393  | 4.941035  |
| C  | -1.729951 | -3.809290 | 0.481991  |
| C  | -1.064665 | -3.338117 | -0.836129 |
| H  | -2.827287 | -3.864809 | 0.288646  |
| H  | 0.044950  | -3.446207 | -0.768506 |
| H  | -1.281288 | -4.074243 | -1.650331 |
| C  | -1.251384 | -5.223807 | 0.856916  |
| H  | -1.439554 | -5.951236 | 0.040331  |
| H  | -0.159944 | -5.221363 | 1.066792  |
| H  | -1.768685 | -5.592849 | 1.767268  |
| C  | -1.514007 | -2.828312 | 1.644636  |

|  |    |           |           |           |
|--|----|-----------|-----------|-----------|
|  | H  | -0.439740 | -2.755281 | 1.900140  |
|  | H  | -2.054843 | -3.161498 | 2.553461  |
|  | C  | -0.140766 | 2.860416  | -1.415519 |
|  | C  | 1.552871  | 1.735027  | -3.348471 |
|  | C  | 0.959761  | 2.988903  | -3.599667 |
|  | C  | 0.097108  | 3.559283  | -2.615772 |
|  | H  | -0.816092 | 3.282345  | -0.656023 |
|  | H  | 2.209676  | 1.277147  | -4.105784 |
|  | C  | -0.556914 | 4.896791  | -2.859474 |
|  | H  | -1.184708 | 4.877833  | -3.776011 |
|  | H  | -1.200689 | 5.201625  | -2.012222 |
|  | H  | 0.200622  | 5.694251  | -3.016730 |
|  | C  | 1.229457  | 3.715823  | -4.893073 |
|  | H  | 0.288513  | 3.903782  | -5.453128 |
|  | H  | 1.684809  | 4.711879  | -4.706142 |
|  | H  | 1.912024  | 3.148330  | -5.554460 |
|  | Zn | -2.483728 | -2.206670 | -1.944335 |
|  | C  | -0.350320 | -1.618412 | -3.148181 |
|  | H  | -0.121132 | -0.658677 | -3.661960 |
|  | H  | 0.446473  | -2.366321 | -3.361504 |
|  | H  | -1.249656 | -2.005136 | -3.688820 |
|  | C  | -4.124871 | -2.507779 | -2.973163 |
|  | H  | -4.040040 | -3.427803 | -3.590020 |
|  | H  | -5.001107 | -2.623266 | -2.302906 |
|  | H  | -4.328325 | -1.654939 | -3.654457 |

| 4                                                                                  |                             | 113                                            |
|------------------------------------------------------------------------------------|-----------------------------|------------------------------------------------|
| 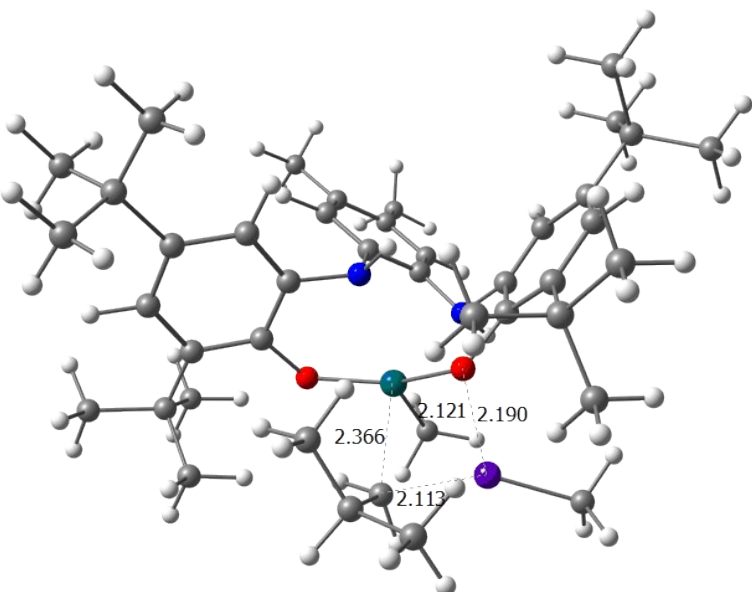 |                             | PhTitBuCH3+propTS+POST--ZnMe2min0isomer180 SCF |
|                                                                                    |                             | Done: -3736.13004807 A.U.                      |
| Zero-point correction=                                                             | 0.954826 (Hartree/Particle) | Ti -0.121536 -0.888104 -1.329617               |
| Thermal correction to Energy=                                                      | 1.032794                    | N -0.467992 0.849950 0.215772                  |
| Thermal correction to Enthalpy=                                                    | 1.033912                    | O -1.922291 -0.448177 -1.407396                |
| Thermal correction to Gibbs Free Energy=                                           | 0.838435                    | C -2.620124 -0.004609 -0.324452                |
| Sum of electronic and zero-point Energies=                                         | -3735.175222                | C -1.828531 0.625316 0.661012                  |
| Sum of electronic and thermal Energies=                                            | -3735.097254                | C -2.350714 1.015365 1.896752                  |
| Sum of electronic and thermal Enthalpies=                                          | -3735.096136                | H -1.690117 1.495019 2.632324                  |
| Sum of electronic and thermal Free Energies=                                       | -3735.291613                | C -3.719592 0.793186 2.160088                  |
| Solvent: -3735.5330715                                                             |                             | C -4.506043 0.220175 1.129888                  |
|                                                                                    |                             | H -5.575985 0.073941 1.328297                  |
|                                                                                    |                             | C -4.010720 -0.191738 -0.125593                |
|                                                                                    |                             | C -0.328865 2.017651 -0.654100                 |
|                                                                                    |                             | C -4.373098 1.156874 3.508531                  |
|                                                                                    |                             | N 1.455164 0.728665 -1.643069                  |
|                                                                                    |                             | O 1.344183 -1.401808 -0.135784                 |
|                                                                                    |                             | C 2.320656 -0.512088 0.244536                  |
|                                                                                    |                             | C 2.424791 0.647636 -0.546577                  |
|                                                                                    |                             | C 3.346825 1.667451 -0.285746                  |
|                                                                                    |                             | H 3.350631 2.556030 -0.932546                  |
|                                                                                    |                             | C 4.226579 1.532996 0.803287                   |
|                                                                                    |                             | C 4.109806 0.361389 1.590403                   |
|                                                                                    |                             | H 4.786520 0.259437 2.448462                   |
|                                                                                    |                             | C 3.184816 -0.678538 1.365252                  |
|                                                                                    |                             | C 0.656881 1.933472 -1.653210                  |
|                                                                                    |                             | C 5.274722 2.602327 1.168821                   |
|                                                                                    |                             | C -4.897982 -0.813405 -1.220598                |
|                                                                                    |                             | C 3.116124 -1.914250 2.283340                  |
|                                                                                    |                             | H 0.216914 0.863884 0.989536                   |
|                                                                                    |                             | H 1.936838 0.611994 -2.546484                  |
|                                                                                    |                             | H -2.458414 -2.419895 0.547634                 |
|                                                                                    |                             | C 5.264116 3.781602 0.174376                   |
|                                                                                    |                             | H 5.498597 3.453023 -0.859702                  |
|                                                                                    |                             | H 4.286107 4.306990 0.163282                   |
|                                                                                    |                             | H 6.032577 4.526064 0.465237                   |
|                                                                                    |                             | C 4.962578 3.149377 2.585939                   |
|                                                                                    |                             | H 4.996001 2.351433 3.355648                   |
|                                                                                    |                             | H 5.706422 3.921387 2.873524                   |
|                                                                                    |                             | C 3.954692 3.613178 2.619890                   |
|                                                                                    |                             | C 6.685653 1.959605 1.156027                   |
|                                                                                    |                             | H 7.454999 2.717579 1.411668                   |
|                                                                                    |                             | H 6.775616 1.135408 1.892751                   |
|                                                                                    |                             | H 6.927332 1.548082 0.154244                   |
|                                                                                    |                             | C 4.092926 -1.814489 3.475208                  |
|                                                                                    |                             | H 5.151408 -1.759372 3.147779                  |
|                                                                                    |                             | H 3.877203 -0.936783 4.118999                  |
|                                                                                    |                             | H 3.993517 -2.720244 4.107219                  |
|                                                                                    |                             | C 3.495391 -3.169087 1.459852                  |
|                                                                                    |                             | H 2.837599 -3.289926 0.579834                  |
|                                                                                    |                             | H 4.536201 -3.099965 1.084060                  |
|                                                                                    |                             | H 3.406867 -4.086009 2.078450                  |
|                                                                                    |                             | C 1.681213 -2.047949 2.852112                  |
|                                                                                    |                             | H 1.414711 -1.156621 3.458178                  |

|  |    |           |           |           |
|--|----|-----------|-----------|-----------|
|  | H  | 0.933228  | -2.155324 | 2.046204  |
|  | H  | 1.605676  | -2.939941 | 3.507926  |
|  | C  | -4.447904 | -2.272358 | -1.492253 |
|  | H  | -3.393681 | -2.315083 | -1.829370 |
|  | H  | -4.549899 | -2.897858 | -0.581417 |
|  | H  | -5.075785 | -2.724150 | -2.287893 |
|  | C  | -4.758691 | 0.029656  | -2.515762 |
|  | H  | -5.086884 | 1.075379  | -2.341541 |
|  | H  | -3.712488 | 0.049322  | -2.879465 |
|  | H  | -5.394443 | -0.398100 | -3.318769 |
|  | C  | -6.385804 | -0.836169 | -0.811430 |
|  | H  | -6.563934 | -1.461369 | 0.087976  |
|  | H  | -6.777004 | 0.183219  | -0.613532 |
|  | H  | -6.989232 | -1.267590 | -1.635715 |
|  | C  | -4.941681 | -0.134694 | 4.152671  |
|  | H  | -5.413926 | 0.097438  | 5.130093  |
|  | H  | -5.713079 | -0.611440 | 3.514138  |
|  | H  | -4.137065 | -0.878942 | 4.327179  |
|  | C  | -5.521727 | 2.170126  | 3.267714  |
|  | H  | -6.314340 | 1.755235  | 2.612567  |
|  | H  | -5.998679 | 2.446480  | 4.231017  |
|  | H  | -5.140796 | 3.098800  | 2.794124  |
|  | C  | -3.362891 | 1.788129  | 4.489089  |
|  | H  | -2.527425 | 1.096690  | 4.726295  |
|  | H  | -2.935284 | 2.733539  | 4.093939  |
|  | H  | -3.868798 | 2.031637  | 5.445165  |
|  | C  | -1.012656 | -3.924117 | -0.158356 |
|  | C  | -0.579457 | -3.205511 | -1.459775 |
|  | H  | -1.851121 | -4.607625 | -0.430162 |
|  | H  | -0.426054 | -3.955239 | -2.276277 |
|  | H  | -1.439181 | -2.641587 | -1.889241 |
|  | C  | 0.126454  | -4.788932 | 0.406071  |
|  | H  | 0.952960  | -4.156479 | 0.795822  |
|  | H  | -0.219058 | -5.413890 | 1.255230  |
|  | H  | 0.544388  | -5.476326 | -0.361088 |
|  | C  | -1.548781 | -2.943734 | 0.896890  |
|  | H  | -0.790270 | -2.173231 | 1.156711  |
|  | H  | -1.804857 | -3.466459 | 1.840753  |
|  | C  | -1.181880 | 3.127986  | -0.618176 |
|  | C  | 0.795291  | 2.956069  | -2.600671 |
|  | C  | -0.056849 | 4.079122  | -2.574802 |
|  | C  | -1.058349 | 4.167770  | -1.562993 |
|  | H  | -1.971571 | 3.171374  | 0.147128  |
|  | H  | 1.571509  | 2.873171  | -3.378862 |
|  | C  | -1.986159 | 5.356547  | -1.512984 |
|  | H  | -2.567408 | 5.453653  | -2.455017 |
|  | H  | -2.706577 | 5.283634  | -0.675666 |
|  | H  | -1.421246 | 6.306063  | -1.395738 |
|  | C  | 0.088875  | 5.170607  | -3.605909 |
|  | H  | -0.848674 | 5.303433  | -4.187134 |
|  | H  | 0.301166  | 6.151140  | -3.128471 |
|  | H  | 0.905690  | 4.957167  | -4.321899 |
|  | Zn | 1.522651  | -3.034447 | -1.584565 |
|  | C  | 0.336882  | -1.090530 | -3.390490 |
|  | H  | -0.334161 | -1.843574 | -3.854509 |
|  | H  | 0.067006  | -0.094338 | -3.815107 |
|  | H  | 1.382913  | -1.324987 | -3.692731 |
|  | C  | 3.293407  | -3.598575 | -2.188022 |
|  | H  | 3.314798  | -3.778809 | -3.283475 |
|  | H  | 4.041411  | -2.812709 | -1.947139 |
|  | H  | 3.611939  | -4.533612 | -1.681057 |

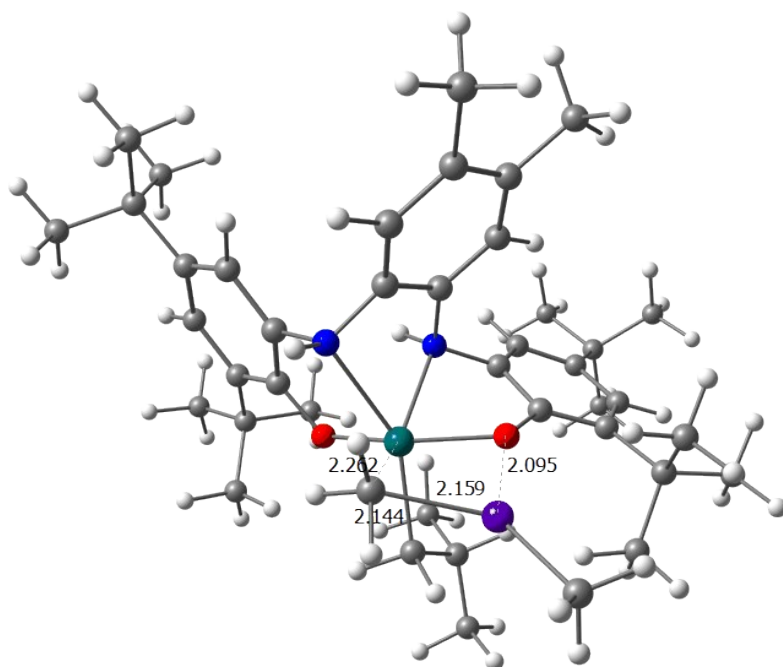

Zero-point correction= 0.954910 (Hartree/Particle)  
 Thermal correction to Energy= 1.031729  
 Thermal correction to Enthalpy= 1.032847  
 Thermal correction to Gibbs Free Energy= 0.840421  
 Sum of electronic and zero-point Energies= -3735.164724  
 Sum of electronic and thermal Energies= -3735.087905  
 Sum of electronic and thermal Enthalpies= -3735.086787  
 Sum of electronic and thermal Free Energies= -3735.279213

Solvent: - 3735.5260845

113

PhTitBuCH3+propTS+POST--ZnMe2min0TSisomerFillallflc  
 SCF Done: -3736.11963406 A.U.

|    |           |           |           |
|----|-----------|-----------|-----------|
| Ti | -0.008614 | 0.159506  | -1.487406 |
| N  | 0.111608  | 0.069730  | 0.747982  |
| O  | -1.780037 | 0.706110  | -0.820542 |
| C  | -2.241440 | 0.073389  | 0.313694  |
| C  | -1.201130 | -0.391844 | 1.153267  |
| C  | -1.433868 | -1.193197 | 2.273454  |
| H  | -0.579120 | -1.532320 | 2.875323  |
| C  | -2.759842 | -1.539978 | 2.599885  |
| C  | -3.789960 | -0.990392 | 1.800784  |
| H  | -4.824618 | -1.225366 | 2.080916  |
| C  | -3.594539 | -0.172951 | 0.665323  |
| C  | 0.376343  | 1.473954  | 1.085750  |
| C  | -3.112647 | -2.468675 | 3.777359  |
| N  | 1.795538  | 1.502423  | -0.899464 |
| O  | 1.428375  | -1.026659 | -1.432085 |
| C  | 2.640701  | -0.764233 | -0.875730 |
| C  | 2.896970  | 0.588454  | -0.569750 |
| C  | 4.098109  | 1.019943  | 0.004267  |
| H  | 4.224564  | 2.087194  | 0.234622  |
| C  | 5.106919  | 0.076383  | 0.274581  |
| C  | 4.831860  | -1.279700 | -0.033496 |
| H  | 5.613123  | -2.019055 | 0.187500  |
| C  | 3.626500  | -1.751615 | -0.589195 |
| C  | 1.214237  | 2.206929  | 0.222334  |
| C  | 6.467045  | 0.462489  | 0.889602  |
| C  | -4.783110 | 0.423731  | -0.115344 |
| C  | 3.347656  | -3.249180 | -0.812368 |
| H  | 0.870732  | -0.548809 | 1.080322  |
| H  | 2.106903  | 2.180346  | -1.610092 |
| H  | -0.585898 | -2.535905 | -0.426538 |
| C  | 6.569373  | 1.978627  | 1.155790  |
| H  | 6.474927  | 2.569881  | 0.220941  |
| H  | 5.796912  | 2.327723  | 1.872861  |
| H  | 7.558575  | 2.217672  | 1.596023  |
| C  | 6.647845  | -0.286156 | 2.235824  |
| H  | 6.636963  | -1.387485 | 2.104727  |
| H  | 7.620018  | -0.016415 | 2.698554  |
| H  | 5.841236  | -0.020658 | 2.950589  |
| C  | 7.599851  | 0.057314  | -0.088640 |
| H  | 8.589367  | 0.325806  | 0.336652  |
| H  | 7.607504  | -1.033947 | -0.286223 |
| H  | 7.490600  | 0.578020  | -1.062464 |
| C  | 4.593991  | -4.119577 | -0.546684 |
| H  | 5.433830  | -3.854372 | -1.221818 |
| H  | 4.948986  | -4.041742 | 0.501769  |
| H  | 4.344887  | -5.184895 | -0.727402 |
| C  | 2.887962  | -3.505246 | -2.270981 |
| H  | 1.965015  | -2.947813 | -2.518559 |
| H  | 3.678444  | -3.202816 | -2.988775 |
| H  | 2.689163  | -4.586991 | -2.420160 |
| C  | 2.237772  | -3.665148 | 0.189085  |
| H  | 2.592429  | -3.551942 | 1.234930  |
| H  | 1.328689  | -3.048595 | 0.055989  |
| H  | 1.949140  | -4.726182 | 0.036893  |
| C  | -4.848370 | -0.187516 | -1.536334 |
| H  | -3.909622 | -0.035554 | -2.100852 |
| H  | -5.034629 | -1.279623 | -1.488870 |
| H  | -5.662979 | 0.281283  | -2.124859 |
| C  | -4.605460 | 1.963074  | -0.174639 |
| H  | -4.599774 | 2.394629  | 0.847417  |
| H  | -3.661096 | 2.256012  | -0.671319 |
| H  | -5.440214 | 2.426375  | -0.739810 |
| C  | -6.134692 | 0.137175  | 0.575206  |
| H  | -6.364650 | -0.947223 | 0.615703  |
| H  | -6.169401 | 0.543452  | 1.606983  |
| H  | -6.949415 | 0.621426  | -0.000448 |
| C  | -3.851387 | -3.714785 | 3.222551  |
| H  | -4.110757 | -4.408741 | 4.049109  |
| H  | -4.795413 | -3.443155 | 2.707379  |
| H  | -3.214357 | -4.264548 | 2.498809  |
| C  | -4.031697 | -1.715034 | 4.772837  |
| H  | -4.983717 | -1.394897 | 4.302330  |
| H  | -4.290013 | -2.371609 | 5.629479  |
| H  | -3.528046 | -0.810514 | 5.172724  |
| C  | -1.854546 | -2.942899 | 4.534321  |
| H  | -1.164537 | -3.512247 | 3.876898  |
| H  | -1.294347 | -2.095676 | 4.983028  |
| H  | -2.146671 | -3.617375 | 5.364336  |
| C  | -1.863899 | -2.180735 | -2.194355 |
| C  | -1.017569 | -1.095994 | -2.902311 |
| H  | -2.615738 | -1.662016 | -1.563499 |
| H  | -0.191572 | -1.542201 | -3.503583 |
| H  | -1.672917 | -0.580898 | -3.649611 |
| C  | -2.643189 | -3.009256 | -3.235008 |
| H  | -3.296455 | -2.363847 | -3.858922 |
| H  | -1.947722 | -3.547099 | -3.913999 |
| H  | -3.287668 | -3.765557 | -2.738131 |
| C  | -1.048382 | -3.094040 | -1.266934 |

|  |    |           |           |           |
|--|----|-----------|-----------|-----------|
|  | H  | -0.227986 | -3.600571 | -1.815490 |
|  | H  | -1.695641 | -3.872856 | -0.814454 |
|  | C  | -0.250248 | 2.122328  | 2.158778  |
|  | C  | 1.418143  | 3.577118  | 0.448883  |
|  | C  | 0.793997  | 4.240560  | 1.523628  |
|  | C  | -0.051678 | 3.496303  | 2.398539  |
|  | H  | -0.922874 | 1.543879  | 2.810407  |
|  | H  | 2.075295  | 4.140901  | -0.233509 |
|  | C  | -0.733608 | 4.173553  | 3.561334  |
|  | H  | -1.385693 | 5.005150  | 3.218121  |
|  | H  | -1.359044 | 3.467643  | 4.140845  |
|  | H  | 0.006191  | 4.624160  | 4.257043  |
|  | C  | 1.018579  | 5.715047  | 1.747987  |
|  | H  | 0.059909  | 6.276171  | 1.726403  |
|  | H  | 1.468433  | 5.905826  | 2.745891  |
|  | H  | 1.688216  | 6.154546  | 0.983862  |
|  | Zn | -2.071166 | 1.534286  | -2.722637 |
|  | C  | 0.032112  | 1.637940  | -3.199248 |
|  | H  | 0.452676  | 2.638974  | -2.967894 |
|  | H  | 0.887696  | 0.929813  | -3.361029 |
|  | H  | -0.387241 | 1.693357  | -4.230041 |
|  | C  | -3.591936 | 2.262718  | -3.722590 |
|  | H  | -3.265821 | 3.080247  | -4.399493 |
|  | H  | -4.046360 | 1.462508  | -4.345235 |
|  | H  | -4.377262 | 2.656886  | -3.047607 |

5 (isomer)

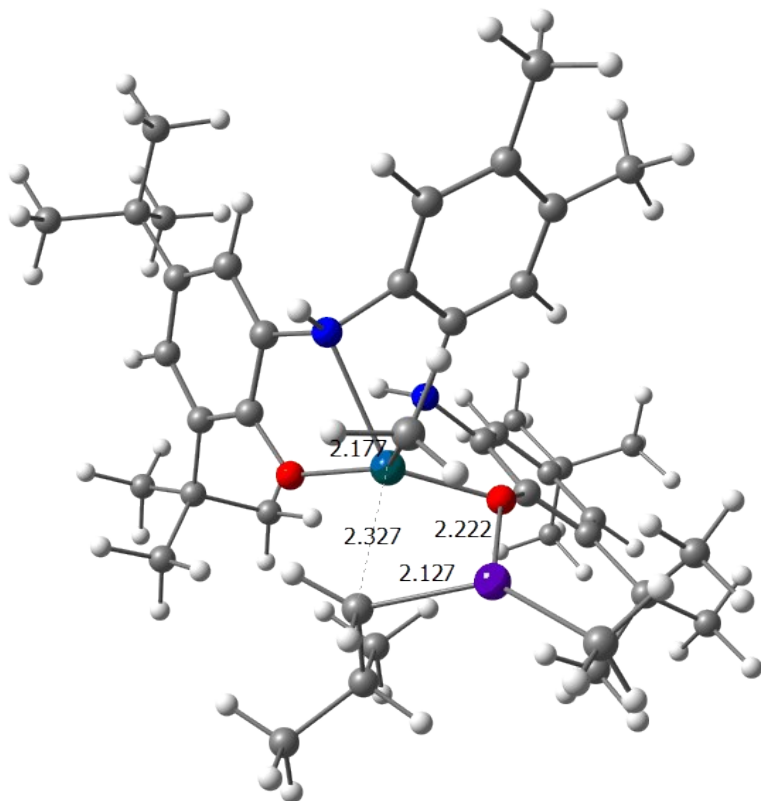

Zero-point correction= 0.954321 (Hartree/Particle)  
 Thermal correction to Energy= 1.032524  
 Thermal correction to Enthalpy= 1.033642  
 Thermal correction to Gibbs Free Energy= 0.837342  
 Sum of electronic and zero-point Energies= -3735.169384  
 Sum of electronic and thermal Energies= -3735.091182  
 Sum of electronic and thermal Enthalpies= -3735.090064  
 Sum of electronic and thermal Free Energies= -3735.286363

Solvent: -3735.5275321

113

PhTitBuCH3+propTS+POST--ZnMe2minisomer SCF Done: -3736.12370565 A.U.

|    |           |           |           |
|----|-----------|-----------|-----------|
| Ti | -0.152020 | -1.205467 | -1.019407 |
| N  | 0.204524  | 0.803547  | 0.007589  |
| O  | -1.885558 | -0.416484 | -0.771497 |
| C  | -2.152690 | 0.490680  | 0.229430  |
| C  | -1.000555 | 1.129463  | 0.736127  |
| C  | -1.040590 | 2.021029  | 1.811601  |
| H  | -0.104444 | 2.482080  | 2.156288  |
| C  | -2.280753 | 2.309336  | 2.415056  |
| C  | -3.428862 | 1.696873  | 1.861231  |
| H  | -4.398146 | 1.937593  | 2.315712  |
| C  | -3.427225 | 0.789737  | 0.778716  |
| C  | 0.461594  | 1.617757  | -1.175465 |
| C  | -2.420768 | 3.253215  | 3.625515  |
| N  | 1.787217  | -0.285607 | -1.875994 |
| O  | 1.198995  | -1.765644 | 0.153428  |
| C  | 2.435538  | -1.212666 | 0.245742  |
| C  | 2.819754  | -0.400581 | -0.839766 |
| C  | 4.056004  | 0.253389  | -0.895104 |
| H  | 4.285413  | 0.886764  | -1.763729 |
| C  | 4.963426  | 0.087642  | 0.168932  |
| C  | 4.550086  | -0.713263 | 1.264090  |
| H  | 5.247485  | -0.821866 | 2.105173  |
| C  | 3.304636  | -1.363416 | 1.361986  |
| C  | 1.304630  | 1.048932  | -2.151446 |
| C  | 6.359235  | 0.742162  | 0.186415  |
| C  | -4.730634 | 0.167327  | 0.243388  |
| C  | 2.848452  | -2.123984 | 2.619614  |
| H  | 1.038072  | 0.762672  | 0.620396  |
| H  | 2.099785  | -0.740290 | -2.747128 |
| H  | -1.876795 | -1.809187 | 1.405693  |
| C  | 6.607348  | 1.604017  | -1.068753 |
| H  | 6.561609  | 1.003081  | -2.001086 |
| H  | 5.878174  | 2.437403  | -1.151089 |
| H  | 7.618693  | 2.056205  | -1.020799 |
| C  | 6.485776  | 1.650001  | 1.436948  |
| H  | 6.373396  | 1.078543  | 2.380871  |
| H  | 7.483750  | 2.135120  | 1.460821  |
| H  | 5.714937  | 2.448555  | 1.428223  |
| C  | 7.435299  | -0.373347 | 0.239770  |
| H  | 8.452015  | 0.071992  | 0.251529  |
| H  | 7.335800  | -1.002104 | 1.148265  |
| H  | 7.361490  | -1.040265 | -0.644129 |
| C  | 3.961944  | -2.212115 | 3.684005  |
| H  | 4.852951  | -2.754603 | 3.305643  |
| H  | 4.285141  | -1.211830 | 4.039241  |
| H  | 3.585313  | -2.767558 | 4.566924  |
| C  | 2.424129  | -3.567370 | 2.244735  |
| H  | 1.618791  | -3.574158 | 1.486085  |
| H  | 3.285682  | -4.134692 | 1.836240  |
| C  | 2.056115  | -4.103970 | 3.143802  |
| C  | 1.652384  | -1.341601 | 3.229531  |
| H  | 1.974095  | -0.330610 | 3.556520  |
| H  | 0.823644  | -1.223660 | 2.503335  |
| H  | 1.249795  | -1.874591 | 4.115961  |
| C  | -4.707503 | -1.357025 | 0.510756  |
| H  | -3.847362 | -1.849599 | 0.018549  |
| H  | -4.631854 | -1.569732 | 1.596362  |
| H  | -5.627477 | -1.837962 | 0.120450  |
| C  | -4.850423 | 0.471293  | -1.271745 |
| H  | -4.925956 | 1.564933  | -1.442418 |
| H  | -3.980803 | 0.095485  | -1.841953 |
| H  | -5.758131 | -0.007791 | -1.691933 |
| C  | -5.983290 | 0.743198  | 0.939522  |
| H  | -6.000776 | 0.522538  | 2.026613  |
| H  | -6.067927 | 1.840814  | 0.801211  |
| H  | -6.890724 | 0.283476  | 0.498141  |
| C  | -3.020868 | 2.458685  | 4.814747  |
| H  | -3.132292 | 3.117989  | 5.700747  |
| H  | -4.023633 | 2.048441  | 4.576804  |
| H  | -2.364376 | 1.609878  | 5.097984  |
| C  | -3.361742 | 4.428097  | 3.254165  |
| H  | -4.378174 | 4.078390  | 2.981103  |
| H  | -3.469012 | 5.120314  | 4.114898  |
| H  | -2.958418 | 5.005549  | 2.396492  |
| C  | -1.060205 | 3.834561  | 4.062739  |
| H  | -0.347287 | 3.039589  | 4.366369  |
| H  | -0.590028 | 4.441315  | 3.260520  |
| H  | -1.199474 | 4.500760  | 4.938071  |
| C  | -1.728625 | -3.810098 | 0.481151  |
| C  | -1.063711 | -3.338278 | -0.836909 |
| H  | -2.825964 | -3.865630 | 0.287813  |
| H  | 0.045955  | -3.446485 | -0.769960 |
| H  | -1.280952 | -4.073897 | -1.651394 |
| C  | -1.249926 | -5.224775 | 0.855338  |
| H  | -0.158434 | -5.222359 | 1.064967  |
| H  | -1.767005 | -5.594230 | 1.765651  |
| H  | -1.438259 | -5.951820 | 0.038456  |
| C  | -1.512812 | -2.829704 | 1.644322  |

|  |    |           |           |           |
|--|----|-----------|-----------|-----------|
|  | H  | -0.438586 | -2.756873 | 1.900003  |
|  | H  | -2.053868 | -3.163348 | 2.552850  |
|  | C  | -0.140873 | 2.860318  | -1.416359 |
|  | C  | 1.553958  | 1.734915  | -3.348208 |
|  | C  | 0.960907  | 2.988721  | -3.599870 |
|  | C  | 0.097606  | 3.559095  | -2.616535 |
|  | H  | -0.816646 | 3.282287  | -0.657285 |
|  | H  | 2.211194  | 1.276990  | -4.105120 |
|  | C  | -0.556407 | 4.896514  | -2.860748 |
|  | H  | -1.183486 | 4.877478  | -3.777770 |
|  | H  | -1.200872 | 5.201269  | -2.013990 |
|  | H  | 0.201154  | 5.694069  | -3.017416 |
|  | C  | 1.231298  | 3.715550  | -4.893180 |
|  | H  | 0.290690  | 3.903147  | -5.453928 |
|  | H  | 1.686219  | 4.711767  | -4.706072 |
|  | H  | 1.914496  | 3.148169  | -5.554013 |
|  | Zn | -2.483839 | -2.206475 | -1.944182 |
|  | C  | -0.351012 | -1.616742 | -3.148173 |
|  | H  | -0.122448 | -0.656212 | -3.660730 |
|  | H  | 0.445681  | -2.364245 | -3.363218 |
|  | H  | -1.250679 | -2.002903 | -3.688719 |
|  | C  | -4.125478 | -2.509708 | -2.971566 |
|  | H  | -4.330021 | -1.657824 | -3.653719 |
|  | H  | -4.040496 | -3.430446 | -3.587338 |
|  | H  | -5.001109 | -2.624982 | -2.300480 |



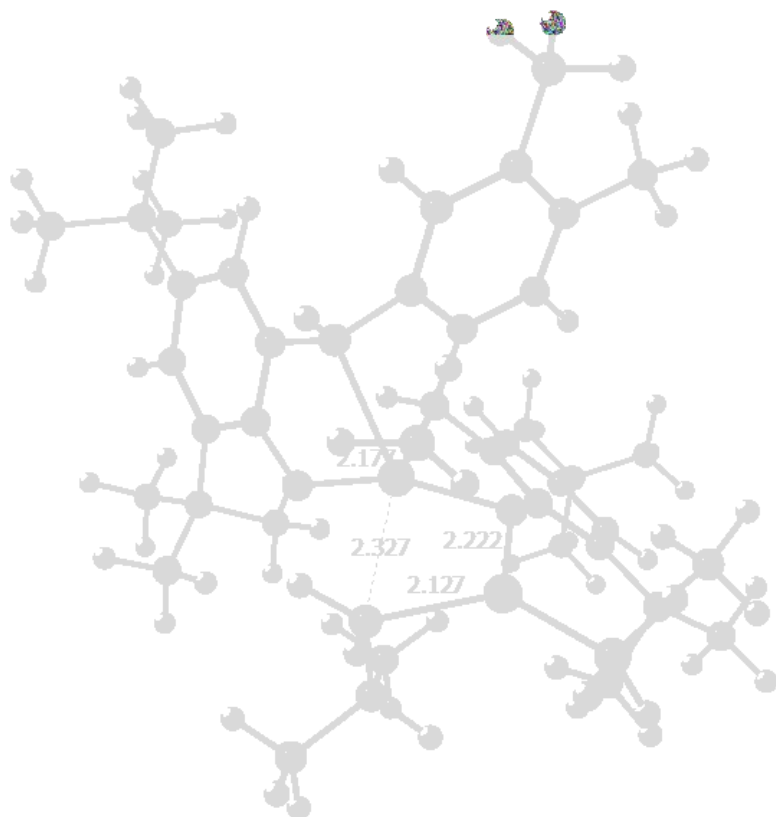

Zero-point correction= 0.953820 (Hartree/Particle)  
 Thermal correction to Energy= 1.032453  
 Thermal correction to Enthalpy= 1.033572  
 Thermal correction to Gibbs Free Energy= 0.835052  
 Sum of electronic and zero-point Energies= -3735.171070  
 Sum of electronic and thermal Energies= -3735.092437  
 Sum of electronic and thermal Enthalpies= -3735.091319  
 Sum of electronic and thermal Free Energies= -3735.289838

Solvent: -3735.5283354

113

PhTitBuCH3+propTS+POST--ZnMe2minisomer180 SCF  
 Done: -3736.12489029 A.U.

|    |           |           |           |
|----|-----------|-----------|-----------|
| Ti | 0.048327  | -0.384606 | -1.588432 |
| N  | -0.348748 | 0.736390  | 0.566884  |
| O  | -1.485247 | 0.637364  | -1.741572 |
| C  | -2.376686 | 0.712120  | -0.710300 |
| C  | -1.798843 | 0.653086  | 0.579221  |
| C  | -2.583466 | 0.507527  | 1.727441  |
| H  | -2.088004 | 0.434509  | 2.704809  |
| C  | -3.985399 | 0.425709  | 1.596757  |
| C  | -4.539255 | 0.579629  | 0.302470  |
| H  | -5.632789 | 0.550591  | 0.209571  |
| C  | -3.782865 | 0.731337  | -0.879556 |
| C  | 0.151931  | 2.098029  | 0.401303  |
| C  | -4.910222 | 0.150010  | 2.798089  |
| N  | 1.654278  | 1.141566  | -1.272025 |
| O  | 1.332528  | -1.412902 | -0.568254 |
| C  | 2.574283  | -0.904461 | -0.294933 |
| C  | 2.781262  | 0.453121  | -0.610955 |
| C  | 3.995564  | 1.103147  | -0.358106 |
| H  | 4.089639  | 2.169951  | -0.602521 |
| C  | 5.063320  | 0.381280  | 0.203163  |
| C  | 4.853648  | -0.995660 | 0.458364  |
| H  | 5.695611  | -1.568244 | 0.868463  |
| C  | 3.647430  | -1.684629 | 0.223275  |
| C  | 1.145700  | 2.307904  | -0.564289 |
| C  | 6.424398  | 1.025371  | 0.533911  |
| C  | -4.418290 | 0.898652  | -2.274253 |
| C  | 3.503849  | -3.191792 | 0.529868  |
| H  | 0.064395  | 0.296756  | 1.404059  |
| H  | 1.976711  | 1.447469  | -2.203374 |
| H  | -3.804581 | -1.993623 | -0.806022 |
| C  | 6.459200  | 2.522190  | 0.160794  |
| H  | 6.306556  | 2.681379  | -0.927282 |
| H  | 5.692828  | 3.105420  | 0.713223  |
| H  | 7.448268  | 2.951318  | 0.419805  |
| C  | 6.685973  | 0.891485  | 2.056504  |
| H  | 6.717702  | -0.169038 | 2.379754  |
| H  | 7.661154  | 1.350673  | 2.321744  |
| H  | 5.893810  | 1.401786  | 2.642949  |
| C  | 7.542598  | 0.295969  | -0.254672 |
| H  | 8.529896  | 0.751934  | -0.032779 |
| H  | 7.607191  | -0.778883 | 0.011007  |
| H  | 7.368952  | 0.365607  | -1.348494 |
| C  | 4.877099  | -3.860040 | 0.766845  |
| H  | 5.548017  | -3.746439 | -0.109632 |
| H  | 5.395128  | -3.455324 | 1.659936  |
| H  | 4.733664  | -4.945238 | 0.943971  |
| C  | 2.816329  | -3.939844 | -0.643130 |
| H  | 1.769258  | -3.611662 | -0.788360 |
| H  | 3.358214  | -3.772247 | -1.597045 |
| H  | 2.809289  | -5.030665 | -0.441232 |
| C  | 2.659889  | -3.344312 | 1.817646  |
| H  | 3.161727  | -2.864871 | 2.682865  |
| H  | 1.667424  | -2.870033 | 1.702738  |
| H  | 2.498124  | -4.415828 | 2.059433  |
| C  | -4.018262 | -0.279595 | -3.202330 |
| H  | -2.924452 | -0.312569 | -3.371337 |
| H  | -4.343781 | -1.253167 | -2.781622 |
| H  | -4.505373 | -0.162889 | -4.192473 |
| C  | -3.913643 | 2.233571  | -2.883658 |
| H  | -4.203834 | 3.092535  | -2.244009 |
| H  | -2.811129 | 2.238064  | -2.994243 |
| H  | -4.360247 | 2.388140  | -3.888053 |
| C  | -5.958595 | 0.945803  | -2.196730 |
| H  | -6.387151 | -0.000890 | -1.806584 |
| H  | -6.316880 | 1.781356  | -1.560734 |
| H  | -6.376124 | 1.101799  | -3.212000 |
| C  | -5.628886 | -1.203956 | 2.555290  |
| H  | -6.295964 | -1.446859 | 3.408573  |
| H  | -6.251213 | -1.183235 | 1.637343  |
| H  | -4.893359 | -2.028365 | 2.446476  |
| C  | -5.958299 | 1.284430  | 2.926623  |
| H  | -6.595943 | 1.369121  | 2.023354  |
| H  | -6.629625 | 1.090405  | 3.788685  |
| H  | -5.465072 | 2.265211  | 3.088370  |
| C  | -4.124133 | 0.054929  | 4.122237  |
| H  | -3.382780 | -0.771599 | 4.107542  |
| H  | -3.590449 | 0.999703  | 4.356989  |
| H  | -4.821074 | -0.146376 | 4.960636  |
| C  | -2.245069 | -3.466415 | -1.320764 |
| C  | -1.153020 | -2.374228 | -1.529266 |
| H  | -2.662969 | -3.689589 | -2.330309 |
| H  | -0.318978 | -2.797306 | -2.143166 |
| H  | -1.663877 | -1.584446 | -2.132142 |
| C  | -1.644107 | -4.774897 | -0.776215 |
| H  | -1.260424 | -4.655182 | 0.264451  |
| H  | -2.410546 | -5.575489 | -0.736580 |
| H  | -0.803590 | -5.134106 | -1.405125 |
| C  | -3.401131 | -2.957923 | -0.439994 |

|  |    |           |           |           |
|--|----|-----------|-----------|-----------|
|  | H  | -3.071864 | -2.785133 | 0.608323  |
|  | H  | -4.229112 | -3.694831 | -0.408313 |
|  | C  | -0.378769 | 3.192847  | 1.099182  |
|  | C  | 1.601300  | 3.608456  | -0.830341 |
|  | C  | 1.078860  | 4.716838  | -0.135350 |
|  | C  | 0.074992  | 4.503568  | 0.855296  |
|  | H  | -1.182819 | 3.018615  | 1.831170  |
|  | H  | 2.371035  | 3.765747  | -1.603563 |
|  | C  | -0.506226 | 5.670463  | 1.614646  |
|  | H  | -0.985927 | 6.399715  | 0.926923  |
|  | H  | -1.266850 | 5.347083  | 2.351135  |
|  | H  | 0.282889  | 6.229702  | 2.161297  |
|  | C  | 1.570457  | 6.110793  | -0.437361 |
|  | H  | 0.739275  | 6.766737  | -0.774272 |
|  | H  | 1.999281  | 6.591212  | 0.467991  |
|  | H  | 2.347803  | 6.115225  | -1.225586 |
|  | Zn | -0.497734 | -2.190154 | 0.439458  |
|  | C  | 0.793098  | -0.390376 | -3.528896 |
|  | H  | 0.660267  | 0.601803  | -4.015009 |
|  | H  | 1.863658  | -0.691454 | -3.559757 |
|  | H  | 0.196323  | -1.135838 | -4.102113 |
|  | C  | -0.738704 | -2.355478 | 2.381702  |
|  | H  | -0.100753 | -1.650196 | 2.958073  |
|  | H  | -1.799481 | -2.152297 | 2.639133  |
|  | H  | -0.489077 | -3.379039 | 2.732152  |

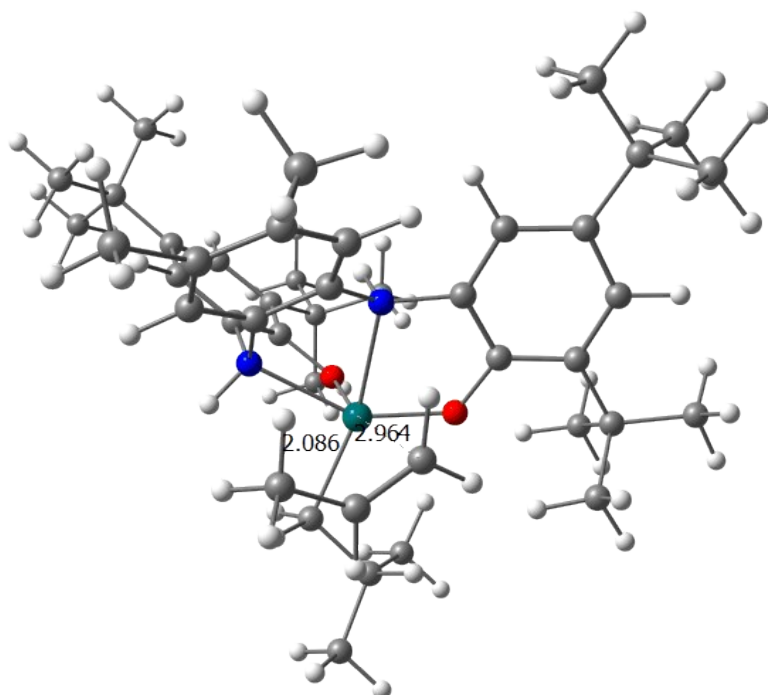

Zero-point correction= 0.962787 (Hartree/Particle)  
 Thermal correction to Energy= 1.039190  
 Thermal correction to Enthalpy= 1.040309  
 Thermal correction to Gibbs Free Energy= 0.846254  
 Sum of electronic and zero-point Energies= -1993.811069  
 Sum of electronic and thermal Energies= -1993.734666  
 Sum of electronic and thermal Enthalpies= -1993.733548  
 Sum of electronic and thermal Free Energies= -1993.927603

Solvent: -1994.4318219

113

PhTitBuCH3+propTS2+isomerBISrealPRE SCF Done: -  
1994.77385648 A.U.

|    |           |           |           |
|----|-----------|-----------|-----------|
| Ti | -0.071409 | -1.046700 | -1.254563 |
| N  | -0.381635 | 0.742955  | 0.163423  |
| O  | -1.724923 | -1.383928 | -0.554669 |
| C  | -2.406664 | -0.560807 | 0.290956  |
| C  | -1.738306 | 0.617378  | 0.698248  |
| C  | -2.320967 | 1.505675  | 1.611952  |
| H  | -1.743688 | 2.369312  | 1.965899  |
| C  | -3.626000 | 1.261028  | 2.084550  |
| C  | -4.285328 | 0.094095  | 1.627323  |
| H  | -5.302011 | -0.094297 | 1.996105  |
| C  | -3.718878 | -0.850152 | 0.748743  |
| C  | 0.113553  | 1.933347  | -0.504943 |
| C  | -4.339931 | 2.206147  | 3.072318  |
| N  | 1.726078  | 0.337138  | -1.383845 |
| O  | 1.055130  | -1.837889 | -0.066626 |
| C  | 2.237318  | -1.295416 | 0.344938  |
| C  | 2.633528  | -0.107883 | -0.303951 |
| C  | 3.791387  | 0.586773  | 0.062889  |
| H  | 4.041421  | 1.522365  | -0.455866 |
| C  | 4.599448  | 0.075915  | 1.097516  |
| C  | 4.185482  | -1.125726 | 1.726814  |
| H  | 4.813961  | -1.518945 | 2.536547  |
| C  | 3.018462  | -1.842036 | 1.397694  |
| C  | 1.265193  | 1.714453  | -1.289681 |
| C  | 5.891633  | 0.775741  | 1.564301  |
| C  | -4.444498 | -2.139844 | 0.316259  |
| C  | 2.574185  | -3.123439 | 2.127463  |
| H  | 0.296721  | 0.482044  | 0.904262  |
| H  | 2.188124  | 0.186842  | -2.295782 |
| H  | -1.064843 | -3.734766 | -1.397166 |
| C  | 6.174132  | 2.062732  | 0.761620  |
| H  | 6.311397  | 1.855082  | -0.320363 |
| H  | 5.362131  | 2.811174  | 0.877094  |
| H  | 7.109143  | 2.533979  | 1.126103  |
| C  | 5.749997  | 1.153125  | 3.061904  |
| H  | 5.594217  | 0.261873  | 3.703267  |
| H  | 6.669136  | 1.662941  | 3.418617  |
| H  | 4.892237  | 1.839654  | 3.219734  |
| C  | 7.088589  | -0.192556 | 1.379012  |
| H  | 8.031016  | 0.294770  | 1.704832  |
| H  | 6.970602  | -1.119803 | 1.975873  |
| H  | 7.202505  | -0.485888 | 0.314890  |
| C  | 3.581239  | -3.536764 | 3.221345  |
| H  | 4.585807  | -3.751407 | 2.801439  |
| H  | 3.687841  | -2.761586 | 4.008480  |
| C  | 3.227252  | -4.462873 | 3.717695  |
| C  | 2.460679  | -4.285587 | 1.105333  |
| H  | 1.715801  | -4.068261 | 0.314872  |
| H  | 3.439318  | -4.480006 | 0.619733  |
| H  | 2.146185  | -5.215277 | 1.623514  |
| C  | 1.197601  | -2.868749 | 2.800336  |
| H  | 1.264947  | -2.037824 | 3.533607  |
| H  | 0.415287  | -2.619919 | 2.056288  |
| H  | 0.869064  | -3.777271 | 3.346440  |
| C  | -3.641090 | -3.362185 | 0.835501  |
| H  | -2.612757 | -3.379413 | 0.424458  |
| H  | -3.571547 | -3.346903 | 1.942675  |
| H  | -4.145167 | -4.304738 | 0.536363  |
| C  | -4.549322 | -2.195564 | -1.231486 |
| H  | -5.084387 | -1.306485 | -1.625722 |
| H  | -3.551218 | -2.250516 | -1.708119 |
| H  | -5.117375 | -3.097419 | -1.540303 |
| C  | -5.873095 | -2.213467 | 0.895756  |
| H  | -5.874127 | -2.223419 | 2.005250  |
| H  | -6.506188 | -1.369499 | 0.551162  |
| H  | -6.360256 | -3.151166 | 0.559975  |
| C  | -4.688979 | 1.423474  | 4.364708  |
| H  | -5.205262 | 2.086851  | 5.089436  |
| H  | -5.361844 | 0.565440  | 4.162212  |
| H  | -3.772871 | 1.028680  | 4.850795  |
| C  | -5.640971 | 2.734573  | 2.414137  |
| H  | -6.341577 | 1.913934  | 2.157646  |
| H  | -6.171636 | 3.420130  | 3.107215  |
| H  | -5.417798 | 3.293091  | 1.481272  |
| C  | -3.461042 | 3.414818  | 3.455465  |
| H  | -2.523703 | 3.103530  | 3.962406  |
| H  | -3.194378 | 4.031931  | 2.571321  |
| H  | -4.010946 | 4.072131  | 4.158963  |
| C  | -0.738006 | -2.951256 | -3.451063 |
| C  | 0.392737  | -1.963979 | -3.069842 |
| H  | -1.709780 | -2.398980 | -3.443155 |
| H  | 1.344178  | -2.521587 | -2.887628 |
| H  | 0.598314  | -1.236783 | -3.888511 |
| C  | -0.538314 | -3.504946 | -4.875395 |
| H  | -0.512235 | -2.689806 | -5.628691 |
| H  | 0.421331  | -4.060262 | -4.946017 |
| H  | -1.357127 | -4.201443 | -5.155000 |
| C  | -0.846868 | -4.097063 | -2.425137 |

|  |   |           |           |           |
|--|---|-----------|-----------|-----------|
|  | H | 0.101307  | -4.674554 | -2.382289 |
|  | H | -1.662031 | -4.799134 | -2.694537 |
|  | C | -0.462057 | 3.210272  | -0.478742 |
|  | C | 1.869474  | 2.776092  | -1.973247 |
|  | C | 1.316303  | 4.072355  | -1.931717 |
|  | C | 0.119568  | 4.284480  | -1.188643 |
|  | H | -1.388504 | 3.378197  | 0.086986  |
|  | H | 2.768981  | 2.585193  | -2.580695 |
|  | C | -0.521140 | 5.649967  | -1.153508 |
|  | H | -0.764614 | 6.008404  | -2.176413 |
|  | H | -1.455208 | 5.654673  | -0.559462 |
|  | H | 0.165700  | 6.404872  | -0.714240 |
|  | C | 1.964787  | 5.206410  | -2.686225 |
|  | H | 1.277076  | 5.629234  | -3.449809 |
|  | H | 2.229445  | 6.044592  | -2.007040 |
|  | H | 2.888925  | 4.883983  | -3.203494 |
|  | C | -2.073026 | 0.616050  | -2.674317 |
|  | C | -1.310592 | 0.634540  | -3.793944 |
|  | H | -2.096826 | 1.472093  | -1.980389 |
|  | H | -2.778424 | -0.204447 | -2.479068 |
|  | H | -1.381600 | -0.228922 | -4.480185 |
|  | C | -0.420845 | 1.754701  | -4.232649 |
|  | H | 0.626167  | 1.409061  | -4.378291 |
|  | H | -0.755051 | 2.132663  | -5.223478 |
|  | H | -0.418586 | 2.595824  | -3.513548 |

**6-7 (isomer)**

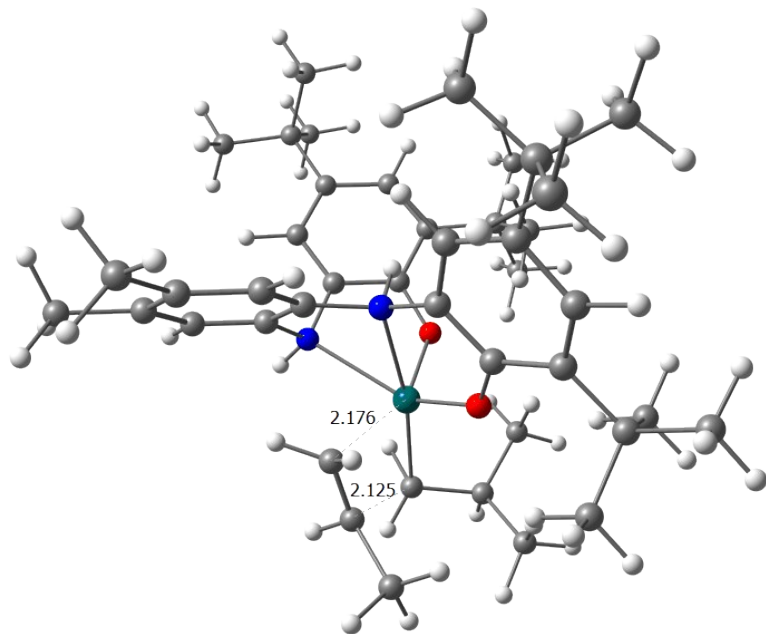

Zero-point correction= 0.964758 (Hartree/Particle)  
 Thermal correction to Energy= 1.038806  
 Thermal correction to Enthalpy= 1.039924  
 Thermal correction to Gibbs Free Energy= 0.853646  
 Sum of electronic and zero-point Energies= -1993.787630  
 Sum of electronic and thermal Energies= -1993.713583  
 Sum of electronic and thermal Enthalpies= -1993.712464  
 Sum of electronic and thermal Free Energies= -1993.898743

Solvent: -1994.4026829

113  
 PhTitBuCH3+propTS2isomer+ SCF Done: -1994.7523886  
 A.U.

|    |           |           |           |
|----|-----------|-----------|-----------|
| Ti | 0.439891  | -1.450795 | 1.267512  |
| N  | 0.010152  | 0.644517  | 0.385017  |
| O  | 2.011974  | -1.003268 | 0.460759  |
| C  | 2.287801  | 0.159333  | -0.205747 |
| C  | 1.235242  | 1.098566  | -0.256777 |
| C  | 1.347700  | 2.287787  | -0.989837 |
| H  | 0.477739  | 2.953576  | -1.061485 |
| C  | 2.558743  | 2.592378  | -1.639447 |
| C  | 3.612111  | 1.652316  | -1.536053 |
| H  | 4.557865  | 1.890111  | -2.039923 |
| C  | 3.526334  | 0.425056  | -0.850024 |
| C  | -0.713826 | 1.459732  | 1.342976  |
| C  | 2.763388  | 3.888124  | -2.449471 |
| N  | -1.843519 | -0.653202 | 1.745751  |
| O  | -0.648955 | -2.028983 | -0.130336 |
| C  | -1.855375 | -1.548639 | -0.506818 |
| C  | -2.587091 | -0.876051 | 0.494774  |
| C  | -3.859802 | -0.344340 | 0.252192  |
| H  | -4.377094 | 0.189329  | 1.061336  |
| C  | -4.426287 | -0.465179 | -1.031016 |
| C  | -3.641120 | -1.076907 | -2.040925 |
| H  | -4.059750 | -1.119334 | -3.055019 |
| C  | -2.353912 | -1.610194 | -1.840024 |
| C  | -1.718836 | 0.763490  | 2.048369  |
| C  | -5.824156 | 0.084561  | -1.378240 |
| C  | 4.692053  | -0.580426 | -0.798806 |
| C  | -1.482666 | -2.158302 | -2.986009 |
| H  | -0.662590 | 0.368710  | -0.359534 |
| H  | -2.300169 | -1.138777 | 2.533067  |
| H  | 1.557221  | -3.381174 | -0.482265 |
| C  | -6.523622 | 0.700135  | -0.148795 |
| H  | -6.663810 | -0.044298 | 0.662770  |
| H  | -5.959373 | 1.564469  | 0.260025  |
| H  | -7.529302 | 1.070212  | -0.433666 |
| C  | -5.680448 | 1.182883  | -2.463843 |
| H  | -5.224426 | 0.790220  | -3.395592 |
| H  | -6.675913 | 1.596037  | -2.728993 |
| H  | -5.046244 | 2.018206  | -2.100314 |
| C  | -6.704669 | -1.072248 | -1.917800 |
| H  | -7.717525 | -0.697228 | -2.173723 |
| H  | -6.278141 | -1.528220 | -2.834562 |
| H  | -6.816101 | -1.875403 | -1.160134 |
| C  | -2.173467 | -2.001535 | -4.357324 |
| H  | -3.122886 | -2.572940 | -4.413566 |
| H  | -2.388081 | -0.939448 | -4.597889 |
| H  | -1.507959 | -2.393740 | -5.152916 |
| C  | -1.200179 | -3.662555 | -2.749320 |
| H  | -0.677475 | -3.825353 | -1.789283 |
| H  | -2.145098 | -4.243767 | -2.736947 |
| H  | -0.559874 | -4.065920 | -3.561501 |
| C  | -0.146323 | -1.363407 | -3.024811 |
| H  | -0.334218 | -0.277678 | -3.166031 |
| H  | 0.443617  | -1.497672 | -2.097219 |
| H  | 0.478636  | -1.709190 | -3.874020 |
| C  | 4.241822  | -1.917116 | -1.443211 |
| H  | 3.372644  | -2.355799 | -0.918949 |
| H  | 3.961291  | -1.763928 | -2.505642 |
| H  | 5.068919  | -2.656413 | -1.409288 |
| C  | 5.099750  | -0.798411 | 0.681011  |
| H  | 5.472282  | 0.144510  | 1.131401  |
| H  | 4.242846  | -1.150630 | 1.286804  |
| H  | 5.905345  | -1.558136 | 0.753959  |
| C  | 5.931171  | -0.073478 | -1.566585 |
| H  | 5.718366  | 0.081809  | -2.644439 |
| H  | 6.325687  | 0.874842  | -1.146462 |
| H  | 6.741685  | -0.827064 | -1.496148 |
| C  | 3.106458  | 3.522142  | -3.916634 |
| H  | 3.259274  | 4.442347  | -4.518293 |
| H  | 4.035253  | 2.920204  | -3.988829 |
| H  | 2.286015  | 2.938059  | -4.382785 |
| C  | 3.931324  | 4.694947  | -1.824983 |
| H  | 4.884654  | 4.128274  | -1.842434 |
| H  | 4.094023  | 5.637269  | -2.388698 |
| H  | 3.713104  | 4.958562  | -0.769156 |
| C  | 1.501168  | 4.775361  | -2.449727 |
| H  | 0.631979  | 4.260861  | -2.910487 |
| H  | 1.217130  | 5.095071  | -1.424944 |
| H  | 1.688249  | 5.695138  | -3.039969 |
| C  | 1.668198  | -4.227952 | 1.571990  |
| C  | 0.826310  | -3.270430 | 2.493287  |
| H  | 1.406909  | -5.229007 | 1.988807  |
| H  | -0.271780 | -3.319051 | 2.229573  |
| H  | 0.845338  | -3.711167 | 3.501926  |
| C  | 3.186266  | -4.058162 | 1.718618  |
| H  | 3.529227  | -4.181776 | 2.763309  |
| H  | 3.708277  | -4.819543 | 1.104573  |
| H  | 3.507337  | -3.062731 | 1.357546  |
| C  | 1.267806  | -4.287861 | 0.086658  |

|  |   |           |           |           |
|--|---|-----------|-----------|-----------|
|  | H | 0.177759  | -4.432284 | -0.038714 |
|  | H | 1.782600  | -5.143592 | -0.394607 |
|  | C | -0.430797 | 2.785775  | 1.681382  |
|  | C | -2.461267 | 1.413513  | 3.038868  |
|  | C | -2.205198 | 2.762770  | 3.371409  |
|  | C | -1.165695 | 3.452037  | 2.689169  |
|  | H | 0.390084  | 3.313915  | 1.176579  |
|  | H | -3.239661 | 0.855238  | 3.584861  |
|  | C | -0.844488 | 4.885614  | 3.035938  |
|  | H | -0.579088 | 4.993766  | 4.109433  |
|  | H | -0.000067 | 5.276302  | 2.435864  |
|  | H | -1.719512 | 5.548602  | 2.863053  |
|  | C | -3.012934 | 3.454912  | 4.441869  |
|  | H | -2.364469 | 3.830668  | 5.262141  |
|  | H | -3.544252 | 4.341900  | 4.034576  |
|  | H | -3.771238 | 2.783041  | 4.888733  |
|  | C | 0.890157  | -0.319560 | 3.070676  |
|  | C | 1.318053  | -1.558131 | 3.652115  |
|  | H | 0.011805  | 0.163103  | 3.525456  |
|  | H | 1.673587  | 0.388487  | 2.739363  |
|  | H | 0.622059  | -1.947202 | 4.415384  |
|  | C | 2.776436  | -1.772491 | 3.979339  |
|  | H | 3.428122  | -1.494952 | 3.129549  |
|  | H | 3.023811  | -1.095367 | 4.825425  |
|  | H | 3.010335  | -2.806087 | 4.294419  |

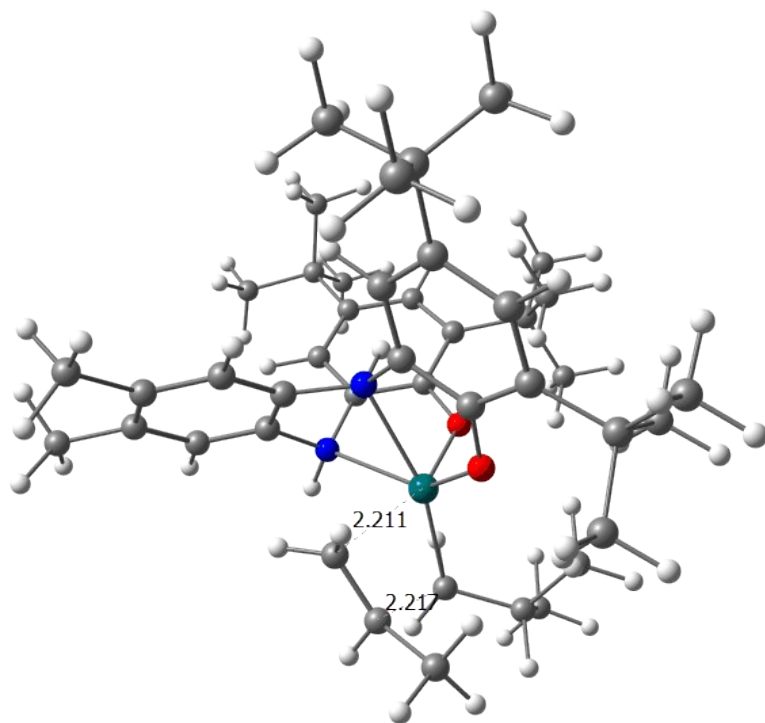

Zero-point correction= 0.964269 (Hartree/Particle)  
 Thermal correction to Energy= 1.038596  
 Thermal correction to Enthalpy= 1.039714  
 Thermal correction to Gibbs Free Energy= 0.852482  
 Sum of electronic and zero-point Energies= -1993.793540  
 Sum of electronic and thermal Energies= -1993.719213  
 Sum of electronic and thermal Enthalpies= -1993.718094  
 Sum of electronic and thermal Free Energies= -1993.905327

Solvent: -1994.4095826

113

PhTitBuCH3+propTS2+isomer SCF Done: -1994.75780874  
A.U.

|    |           |           |           |
|----|-----------|-----------|-----------|
| Ti | 0.243098  | -1.281095 | 1.344079  |
| N  | 0.232750  | 0.806288  | 0.352870  |
| O  | 1.901838  | -1.155725 | 0.594824  |
| C  | 2.401839  | -0.102585 | -0.116280 |
| C  | 1.552357  | 1.020223  | -0.226365 |
| C  | 1.919796  | 2.148516  | -0.971785 |
| H  | 1.202128  | 2.970923  | -1.086842 |
| C  | 3.186207  | 2.192334  | -1.586051 |
| C  | 4.015196  | 1.051137  | -1.462878 |
| H  | 4.992115  | 1.074193  | -1.963220 |
| C  | 3.664026  | -0.123296 | -0.768830 |
| C  | -0.414331 | 1.766742  | 1.224460  |
| C  | 3.675462  | 3.411154  | -2.393791 |
| N  | -1.865850 | -0.139234 | 1.613772  |
| O  | -0.796776 | -1.791406 | -0.118835 |
| C  | -1.946184 | -1.231196 | -0.554772 |
| C  | -2.585974 | -0.352402 | 0.344424  |
| C  | -3.770292 | 0.315638  | 0.007277  |
| H  | -4.213507 | 1.011981  | 0.732488  |
| C  | -4.348436 | 0.100633  | -1.258516 |
| C  | -3.676786 | -0.773648 | -2.152219 |
| H  | -4.116655 | -0.921423 | -3.147577 |
| C  | -2.478185 | -1.448529 | -1.856186 |
| C  | -1.560411 | 1.259855  | 1.871473  |
| C  | -5.650955 | 0.795384  | -1.704374 |
| C  | 4.545859  | -1.386339 | -0.774519 |
| C  | -1.728506 | -2.340875 | -2.862930 |
| H  | -0.424066 | 0.595148  | -0.424793 |
| H  | -2.418173 | -0.518040 | 2.398776  |
| H  | 2.292126  | -3.548609 | 1.205998  |
| C  | -6.234534 | 1.694513  | -0.594920 |
| H  | -6.485997 | 1.114786  | 0.317859  |
| H  | -5.537204 | 2.510905  | -0.312331 |
| H  | -7.170724 | 2.170666  | -0.950244 |
| C  | -5.356064 | 1.676400  | -2.946040 |
| H  | -4.973082 | 1.079272  | -3.798707 |
| H  | -6.281873 | 2.186043  | -3.285575 |
| H  | -4.601130 | 2.455075  | -2.709814 |
| C  | -6.704407 | -0.283215 | -2.066537 |
| H  | -7.653390 | 0.197040  | -2.384140 |
| H  | -6.367186 | -0.933530 | -2.899437 |
| H  | -6.923258 | -0.934496 | -1.195038 |
| C  | -2.465457 | -2.419364 | -4.216117 |
| H  | -3.479982 | -2.856868 | -4.111835 |
| H  | -2.561301 | -1.423784 | -4.696943 |
| H  | -1.896559 | -3.068475 | -4.912331 |
| C  | -1.603127 | -3.777385 | -2.290287 |
| H  | -1.038150 | -3.787897 | -1.337652 |
| H  | -2.604711 | -4.218316 | -2.106713 |
| H  | -1.069324 | -4.429791 | -3.012382 |
| C  | -0.314908 | -1.742793 | -3.109621 |
| H  | -0.389018 | -0.712921 | -3.517753 |
| H  | 0.288854  | -1.709299 | -2.180696 |
| H  | 0.235719  | -2.360975 | -3.848831 |
| C  | 3.760537  | -2.520477 | -1.487546 |
| H  | 2.796856  | -2.730413 | -0.985168 |
| H  | 3.544940  | -2.244845 | -2.540389 |
| H  | 4.357549  | -3.456357 | -1.492737 |
| C  | 4.888993  | -1.803941 | 0.677190  |
| H  | 5.430860  | -0.994023 | 1.207879  |
| H  | 3.976140  | -2.044034 | 1.254123  |
| H  | 5.534918  | -2.706221 | 0.675414  |
| C  | 5.871505  | -1.164089 | -1.533073 |
| H  | 5.705473  | -0.903539 | -2.598674 |
| H  | 6.488702  | -0.367389 | -1.068324 |
| H  | 6.468640  | -2.098260 | -1.513862 |
| C  | 3.962556  | 2.975558  | -3.854163 |
| H  | 4.312143  | 3.842535  | -4.452711 |
| H  | 4.749102  | 2.195559  | -3.907988 |
| H  | 3.048399  | 2.570102  | -4.335318 |
| C  | 4.975137  | 3.955623  | -1.746117 |
| H  | 5.784908  | 3.197806  | -1.739025 |
| H  | 5.346977  | 4.835418  | -2.311559 |
| H  | 4.795659  | 4.270726  | -0.697192 |
| C  | 2.630013  | 4.545571  | -2.418346 |
| H  | 1.683190  | 4.229614  | -2.904331 |
| H  | 2.394811  | 4.915344  | -1.397995 |
| H  | 3.022862  | 5.406215  | -2.996633 |
| C  | 0.525902  | -4.309450 | 2.296413  |
| C  | -0.154386 | -2.989340 | 2.705338  |
| H  | 1.161819  | -4.621386 | 3.153889  |
| H  | -1.023695 | -2.795930 | 2.008625  |
| H  | -0.659298 | -3.111572 | 3.679035  |
| C  | -0.564246 | -5.386771 | 2.101485  |
| H  | -1.215184 | -5.485828 | 2.994466  |
| H  | -1.207710 | -5.137633 | 1.229961  |
| H  | -0.102361 | -6.376639 | 1.904640  |
| C  | 1.426612  | -4.220361 | 1.052086  |

|  |   |           |           |          |
|--|---|-----------|-----------|----------|
|  | H | 0.864576  | -3.863780 | 0.160869 |
|  | H | 1.829417  | -5.220575 | 0.794539 |
|  | C | 0.047698  | 3.046112  | 1.545624 |
|  | C | -2.263274 | 2.052283  | 2.783153 |
|  | C | -1.825766 | 3.359254  | 3.095164 |
|  | C | -0.644875 | 3.854381  | 2.477265 |
|  | H | 0.975106  | 3.421543  | 1.091355 |
|  | H | -3.153928 | 1.640631  | 3.286224 |
|  | C | -0.130475 | 5.233073  | 2.813032 |
|  | H | 0.067169  | 5.338095  | 3.901327 |
|  | H | 0.807141  | 5.468231  | 2.273204 |
|  | H | -0.876058 | 6.015707  | 2.554938 |
|  | C | -2.591309 | 4.205920  | 4.082684 |
|  | H | -1.957327 | 4.494101  | 4.948634 |
|  | H | -2.934776 | 5.155400  | 3.618849 |
|  | H | -3.482872 | 3.679534  | 4.475084 |
|  | C | 0.821387  | -0.147906 | 3.152185 |
|  | C | 1.015907  | -1.424730 | 3.753878 |
|  | H | 0.035438  | 0.498953  | 3.571132 |
|  | H | 1.707739  | 0.388862  | 2.765497 |
|  | H | 0.352449  | -1.654140 | 4.601485 |
|  | C | 2.384722  | -2.050674 | 3.839579 |
|  | H | 2.970014  | -1.879939 | 2.916238 |
|  | H | 2.926504  | -1.553689 | 4.674073 |
|  | H | 2.358174  | -3.133648 | 4.061344 |



6-7 (isomer)

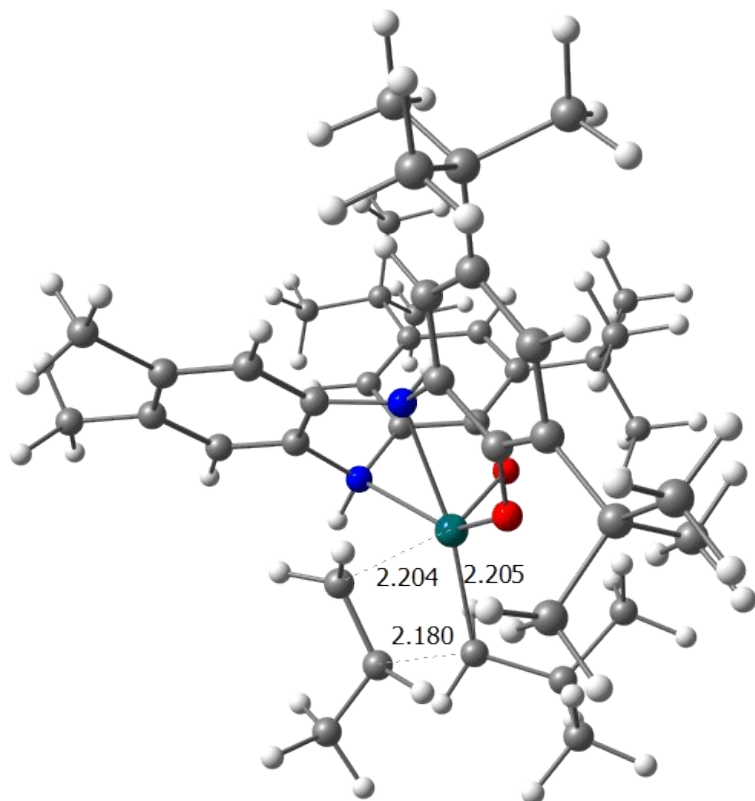

Zero-point correction= 0.964249 (Hartree/Particle)  
 Thermal correction to Energy= 1.038579  
 Thermal correction to Enthalpy= 1.039697  
 Thermal correction to Gibbs Free Energy= 0.852077  
 Sum of electronic and zero-point Energies= -1993.791400  
 Sum of electronic and thermal Energies= -1993.717070  
 Sum of electronic and thermal Enthalpies= -1993.715952  
 Sum of electronic and thermal Free Energies= -1993.903572

Solvent: -1994.40801

113

PhTi(tBu)CH<sub>3</sub>+propTS2+isomerBIS SCF Done: -1994.75564884 A.U.

|    |           |           |           |
|----|-----------|-----------|-----------|
| Ti | 0.275129  | -1.408807 | 1.128017  |
| N  | 0.153869  | 0.712103  | 0.179140  |
| O  | 1.907826  | -1.197801 | 0.345144  |
| C  | 2.376671  | -0.080656 | -0.285119 |
| C  | 1.453767  | 0.979270  | -0.421925 |
| C  | 1.768695  | 2.129285  | -1.159398 |
| H  | 0.998289  | 2.898351  | -1.302730 |
| C  | 3.054888  | 2.269325  | -1.715600 |
| C  | 3.982430  | 1.221612  | -1.497674 |
| H  | 4.992777  | 1.340046  | -1.910163 |
| C  | 3.696970  | 0.033891  | -0.797262 |
| C  | -0.442290 | 1.619279  | 1.145635  |
| C  | 3.478701  | 3.508739  | -2.528954 |
| N  | -1.791149 | -0.345197 | 1.631986  |
| O  | -0.873616 | -1.891200 | -0.261044 |
| C  | -2.063323 | -1.323817 | -0.569452 |
| C  | -2.640857 | -0.525747 | 0.439352  |
| C  | -3.875536 | 0.112261  | 0.268977  |
| H  | -4.268379 | 0.739766  | 1.080660  |
| C  | -4.567708 | -0.041054 | -0.947401 |
| C  | -3.944569 | -0.804480 | -1.967418 |
| H  | -4.466127 | -0.887703 | -2.930061 |
| C  | -2.698208 | -1.445979 | -1.838075 |
| C  | -1.496495 | 1.056769  | 1.893723  |
| C  | -5.939477 | 0.611500  | -1.211259 |
| C  | 4.746034  | -1.067642 | -0.557086 |
| C  | -2.009323 | -2.191523 | -2.995462 |
| H  | -0.541274 | 0.540320  | -0.573616 |
| H  | -2.250255 | -0.755538 | 2.460675  |
| H  | 1.433324  | -3.518465 | -0.400488 |
| C  | -6.453624 | 1.392031  | 0.016213  |
| H  | -6.582855 | 0.733585  | 0.900719  |
| H  | -5.774815 | 2.225467  | 0.294327  |
| H  | -7.443778 | 1.837513  | -0.208950 |
| C  | -5.813400 | 1.596348  | -2.402791 |
| H  | -5.492987 | 1.084948  | -3.333410 |
| H  | -6.791504 | 2.078879  | -2.608887 |
| H  | -5.075133 | 2.395362  | -2.182454 |
| C  | -6.968962 | -0.495569 | -1.555787 |
| H  | -7.966014 | -0.047351 | -1.748126 |
| H  | -6.680098 | -1.065183 | -2.462642 |
| H  | -7.071065 | -1.217780 | -0.719456 |
| C  | -2.838826 | -2.129496 | -4.295019 |
| H  | -3.829328 | -2.616697 | -4.180776 |
| H  | -2.998929 | -1.086706 | -4.639517 |
| H  | -2.300862 | -2.665726 | -5.102825 |
| C  | -1.814403 | -3.679485 | -2.610187 |
| H  | -1.188970 | -3.779830 | -1.703395 |
| H  | -2.791461 | -4.168793 | -2.417997 |
| H  | -1.312535 | -4.227088 | -3.435038 |
| C  | -0.631335 | -1.525330 | -3.266880 |
| H  | -0.757956 | -0.455453 | -3.536218 |
| H  | 0.039876  | -1.589681 | -2.387434 |
| H  | -0.124396 | -2.028857 | -4.116089 |
| C  | 4.267855  | -2.397534 | -1.193954 |
| C  | 3.310301  | -2.740715 | -0.760540 |
| H  | 4.128728  | -2.282330 | -2.288646 |
| H  | 5.022694  | -3.193884 | -1.026452 |
| C  | 4.935233  | -1.236940 | 0.974079  |
| H  | 5.329239  | -0.304447 | 1.428122  |
| H  | 3.978693  | -1.483658 | 1.475163  |
| H  | 5.654546  | -2.054892 | 1.186532  |
| C  | 6.115090  | -0.707186 | -1.171949 |
| H  | 6.059746  | -0.596793 | -2.274692 |
| H  | 6.533260  | 0.228333  | -0.746034 |
| H  | 6.840307  | -1.518687 | -0.958899 |
| C  | 3.883044  | 3.064112  | -3.958509 |
| H  | 4.190739  | 3.943065  | -4.562541 |
| H  | 4.734187  | 2.353232  | -3.946658 |
| H  | 3.035239  | 2.569114  | -4.475823 |
| C  | 4.687171  | 4.185006  | -1.831065 |
| H  | 5.563032  | 3.507920  | -1.765653 |
| H  | 5.004302  | 5.084721  | -2.398370 |
| H  | 4.425819  | 4.501752  | -0.799937 |
| C  | 2.339391  | 4.543299  | -2.641927 |
| H  | 1.451583  | 4.129587  | -3.164408 |
| H  | 2.018718  | 4.918312  | -1.647132 |
| H  | 2.684621  | 5.420095  | -3.226507 |
| C  | 1.182781  | -4.339370 | 1.646717  |
| C  | 0.353977  | -3.234136 | 2.362966  |
| H  | 0.754398  | -5.288819 | 2.046854  |
| H  | -0.679840 | -3.149256 | 1.910751  |
| H  | 0.132309  | -3.560647 | 3.388846  |
| C  | 2.666607  | -4.309162 | 2.044696  |
| H  | 2.805541  | -4.306619 | 3.145913  |
| H  | 3.189082  | -5.202095 | 1.645939  |
| H  | 3.171653  | -3.416637 | 1.622401  |
| C  | 1.009020  | -4.402394 | 0.118013  |

|  |   |           |           |           |
|--|---|-----------|-----------|-----------|
|  | H | -0.058985 | -4.476907 | -0.165843 |
|  | H | 1.531726  | -5.292879 | -0.285223 |
|  | C | -0.003609 | 2.912255  | 1.447346  |
|  | C | -2.130299 | 1.802138  | 2.892349  |
|  | C | -1.713969 | 3.118704  | 3.190046  |
|  | C | -0.625719 | 3.674198  | 2.463311  |
|  | H | 0.853685  | 3.336785  | 0.906847  |
|  | H | -2.948343 | 1.344663  | 3.473338  |
|  | C | -0.134816 | 5.067886  | 2.772247  |
|  | H | 0.184435  | 5.159998  | 3.832565  |
|  | H | 0.722473  | 5.355829  | 2.133610  |
|  | H | -0.938136 | 5.820942  | 2.622322  |
|  | C | -2.403824 | 3.913411  | 4.271759  |
|  | H | -1.692775 | 4.215987  | 5.070120  |
|  | H | -2.836224 | 4.853609  | 3.867088  |
|  | H | -3.224470 | 3.341236  | 4.746262  |
|  | C | 0.966307  | -0.326822 | 2.919604  |
|  | C | 1.333305  | -1.606857 | 3.433910  |
|  | H | 0.226190  | 0.250446  | 3.498560  |
|  | H | 1.752737  | 0.288124  | 2.445945  |
|  | H | 2.330569  | -1.986773 | 3.157598  |
|  | C | 0.880525  | -1.980825 | 4.830001  |
|  | H | 1.098929  | -3.033236 | 5.097615  |
|  | H | 1.432330  | -1.331410 | 5.543582  |
|  | H | -0.201495 | -1.784960 | 4.979487  |

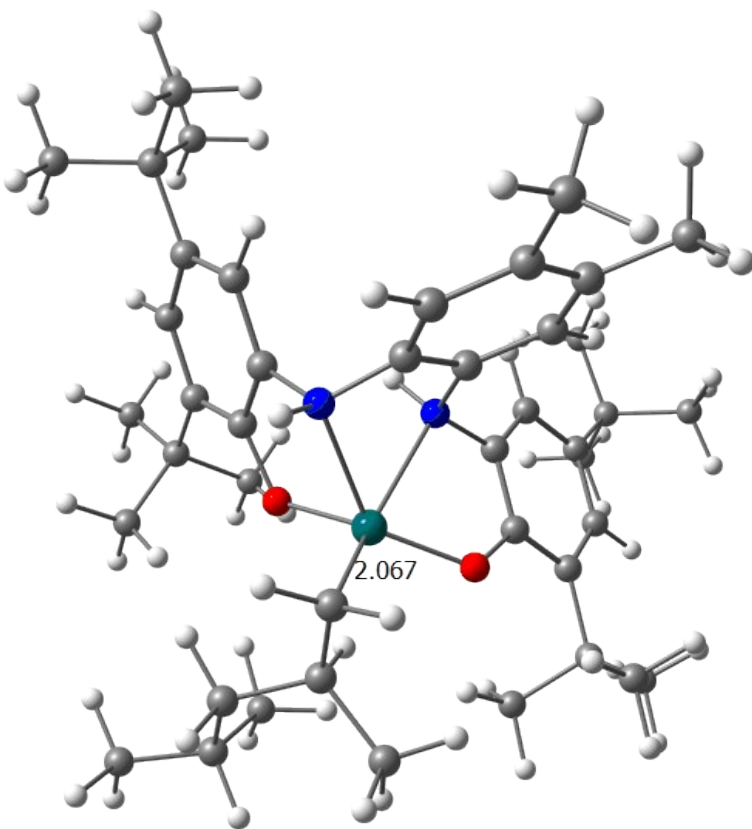

Zero-point correction= 0.966152 (Hartree/Particle)  
 Thermal correction to Energy= 1.040689  
 Thermal correction to Enthalpy= 1.041807  
 Thermal correction to Gibbs Free Energy= 0.852432  
 Sum of electronic and zero-point Energies= -1993.839934  
 Sum of electronic and thermal Energies= -1993.765397  
 Sum of electronic and thermal Enthalpies= -1993.764278  
 Sum of electronic and thermal Free Energies= -1993.953654

Solvent: -1994.4701497

113

PhTitBuCH3+propTS2+isomerBISrealPOST SCF Done: -1994.80608568 A.U.

|    |           |           |           |
|----|-----------|-----------|-----------|
| Ti | -0.096756 | 1.014059  | 1.169391  |
| N  | -0.295230 | -1.005070 | 0.098582  |
| O  | -1.925608 | 0.756686  | 1.016396  |
| C  | -2.478795 | -0.024109 | 0.041643  |
| C  | -1.617004 | -0.996801 | -0.507183 |
| C  | -2.019650 | -1.849296 | -1.541457 |
| H  | -1.305126 | -2.584501 | -1.937871 |
| C  | -3.330938 | -1.739136 | -2.048719 |
| C  | -4.180389 | -0.762723 | -1.471981 |
| H  | -5.200203 | -0.677274 | -1.869783 |
| C  | -3.804592 | 0.119899  | -0.438366 |
| C  | -0.090476 | -1.888154 | 1.238080  |
| C  | -3.858756 | -2.627192 | -3.193465 |
| N  | 1.630980  | -0.275664 | 1.780250  |
| O  | 1.170467  | 1.521291  | -0.068975 |
| C  | 2.256724  | 0.731903  | -0.334650 |
| C  | 2.529347  | -0.280273 | 0.613699  |
| C  | 3.556503  | -1.214253 | 0.441089  |
| H  | 3.701095  | -1.990651 | 1.205695  |
| C  | 4.367266  | -1.135554 | -0.708172 |
| C  | 4.094159  | -0.096676 | -1.633605 |
| H  | 4.728544  | -0.032757 | -2.527410 |
| C  | 3.062092  | 0.853768  | -1.498332 |
| C  | 0.945222  | -1.505776 | 2.116801  |
| C  | 5.517088  | -2.124025 | -0.986913 |
| C  | -4.740261 | 1.204978  | 0.126986  |
| C  | 2.804671  | 1.969228  | -2.528485 |
| H  | 0.453509  | -1.133392 | -0.604646 |
| H  | 2.117713  | 0.105497  | 2.604667  |
| H  | -1.394337 | 4.232560  | -0.287596 |
| C  | 5.665495  | -3.168420 | 0.139071  |
| H  | 5.897988  | -2.694383 | 1.115606  |
| H  | 4.750894  | -3.786897 | 0.256254  |
| H  | 6.500105  | -3.858958 | -0.097188 |
| C  | 5.229325  | -2.870922 | -2.315379 |
| H  | 5.158501  | -2.176291 | -3.177236 |
| H  | 6.043903  | -3.591980 | -2.535532 |
| H  | 4.276378  | -3.436991 | -2.254835 |
| C  | 6.848088  | -1.337557 | -1.106598 |
| H  | 7.689810  | -2.034208 | -1.301352 |
| H  | 6.825548  | -0.603918 | -1.937982 |
| H  | 7.068881  | -0.783446 | -0.170848 |
| C  | 3.795328  | 1.904681  | -3.709773 |
| H  | 4.847919  | 2.022972  | -3.379123 |
| H  | 3.709069  | 0.952722  | -4.273775 |
| H  | 3.578498  | 2.729054  | -4.418981 |
| C  | 2.976849  | 3.338909  | -1.820037 |
| H  | 2.299038  | 3.434681  | -0.950228 |
| H  | 4.018367  | 3.468516  | -1.460182 |
| C  | 2.749617  | 4.167848  | -2.522103 |
| C  | 1.365754  | 1.830898  | -3.094178 |
| H  | 1.238871  | 0.856231  | -3.610362 |
| H  | 0.599008  | 1.906773  | -2.299541 |
| H  | 1.169839  | 2.633969  | -3.834608 |
| C  | -4.106818 | 2.598946  | -0.129491 |
| H  | -3.125113 | 2.696064  | 0.372538  |
| H  | -3.962580 | 2.775389  | -1.215434 |
| H  | -4.768751 | 3.398575  | 0.263272  |
| C  | -4.927654 | 0.979004  | 1.650002  |
| H  | -5.399511 | -0.005668 | 1.847569  |
| H  | -3.960549 | 1.012415  | 2.188637  |
| H  | -5.587085 | 1.764896  | 2.074001  |
| C  | -6.129245 | 1.175585  | -0.544607 |
| H  | -6.069579 | 1.368957  | -1.635693 |
| H  | -6.647418 | 0.206747  | -0.388050 |
| H  | -6.769890 | 1.966507  | -0.104401 |
| C  | -4.306287 | -1.725573 | -4.373251 |
| H  | -4.687624 | -2.347647 | -5.209666 |
| H  | -5.118496 | -1.029393 | -4.080730 |
| H  | -3.459151 | -1.117976 | -4.753707 |
| C  | -5.067618 | -3.451386 | -2.679388 |
| H  | -5.897541 | -2.801988 | -2.333570 |
| H  | -5.465563 | -4.097743 | -3.489323 |
| H  | -4.772599 | -4.104881 | -1.832105 |
| C  | -2.783180 | -3.605970 | -3.709025 |
| H  | -1.897616 | -3.072513 | -4.113640 |
| H  | -2.441719 | -4.304150 | -2.916154 |
| H  | -3.198824 | -4.222995 | -4.531253 |
| C  | 0.142939  | 5.392933  | 0.820557  |
| C  | 0.613091  | 4.311258  | 1.820179  |
| H  | -0.652898 | 5.995117  | 1.315452  |
| H  | 1.514973  | 3.808495  | 1.402607  |
| H  | 0.929851  | 4.791481  | 2.772081  |
| C  | 1.312510  | 6.339382  | 0.498364  |
| H  | 1.746149  | 6.780864  | 1.419825  |
| H  | 2.125494  | 5.796173  | -0.030382 |
| H  | 0.985861  | 7.173919  | -0.155136 |
| C  | -0.448744 | 4.788396  | -0.466787 |

|  |   |           |           |           |
|--|---|-----------|-----------|-----------|
|  | H | 0.267165  | 4.088154  | -0.946140 |
|  | H | -0.686360 | 5.582264  | -1.203825 |
|  | C | -0.878640 | -3.006620 | 1.535959  |
|  | C | 1.201586  | -2.257637 | 3.271771  |
|  | C | 0.420672  | -3.390395 | 3.578914  |
|  | C | -0.637678 | -3.768138 | 2.698072  |
|  | H | -1.698304 | -3.278396 | 0.853758  |
|  | H | 2.013177  | -1.949127 | 3.950647  |
|  | C | -1.492695 | -4.971277 | 3.009516  |
|  | H | -1.998158 | -4.862296 | 3.992950  |
|  | H | -2.273711 | -5.133104 | 2.242021  |
|  | H | -0.880421 | -5.896156 | 3.074486  |
|  | C | 0.698619  | -4.191637 | 4.826420  |
|  | H | -0.190713 | -4.224087 | 5.491594  |
|  | H | 0.942175  | -5.247346 | 4.580154  |
|  | H | 1.543382  | -3.774151 | 5.407267  |
|  | C | 0.177532  | 2.048022  | 2.937964  |
|  | C | -0.419181 | 3.216963  | 2.165646  |
|  | H | 1.214070  | 2.218891  | 3.289963  |
|  | H | -0.466013 | 1.653670  | 3.752405  |
|  | H | -0.747997 | 2.856935  | 1.111608  |
|  | C | -1.748030 | 3.729019  | 2.748536  |
|  | H | -2.239316 | 4.460618  | 2.077527  |
|  | H | -2.454638 | 2.891123  | 2.911436  |
|  | H | -1.553442 | 4.223592  | 3.722004  |

## 2-3 (isomer)

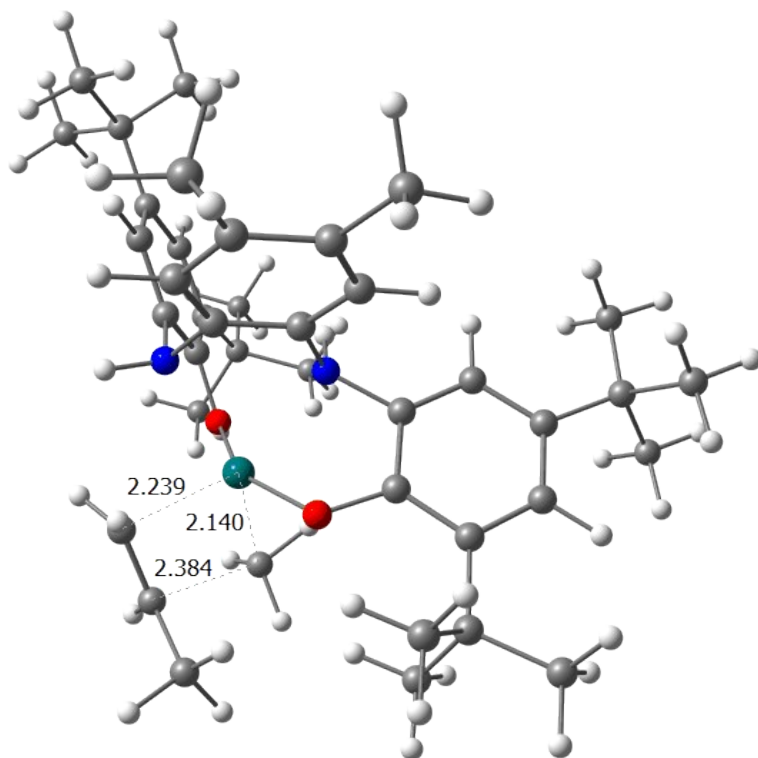

Zero-point correction= 0.880961 (Hartree/Particle)  
 Thermal correction to Energy= 0.949932  
 Thermal correction to Enthalpy= 0.951051  
 Thermal correction to Gibbs Free Energy= 0.774129  
 Sum of electronic and zero-point Energies= -1876.021831  
 Sum of electronic and thermal Energies= -1875.952859  
 Sum of electronic and thermal Enthalpies= -1875.951741  
 Sum of electronic and thermal Free Energies= -1876.128663

Solvent: -1876.5817636

104

PhTitBuCH3+propTS+ SCF Done: -1876.90279160 A.U.

|    |           |           |           |
|----|-----------|-----------|-----------|
| Ti | -0.151870 | -1.007482 | -1.627532 |
| N  | -0.219518 | 0.238617  | 0.306406  |
| O  | -1.898625 | -0.324505 | -1.513511 |
| C  | -2.488255 | -0.166811 | -0.292796 |
| C  | -1.579729 | 0.038205  | 0.771770  |
| C  | -1.987279 | 0.113380  | 2.106392  |
| H  | -1.232722 | 0.270865  | 2.889740  |
| C  | -3.361629 | 0.007142  | 2.406607  |
| C  | -4.260718 | -0.145601 | 1.322637  |
| H  | -5.331511 | -0.208388 | 1.556703  |
| C  | -3.882178 | -0.240172 | -0.033157 |
| C  | 0.029996  | 1.611362  | -0.147285 |
| C  | -3.905186 | 0.073300  | 3.847767  |
| N  | 1.565272  | 0.578991  | -1.721486 |
| O  | 1.285976  | -1.867252 | -0.806629 |
| C  | 2.390468  | -1.238130 | -0.338983 |
| C  | 2.619139  | 0.063925  | -0.828302 |
| C  | 3.724148  | 0.827794  | -0.434369 |
| H  | 3.837001  | 1.846946  | -0.830361 |
| C  | 4.647611  | 0.281633  | 0.477784  |
| C  | 4.385465  | -1.018747 | 0.979376  |
| H  | 5.092971  | -1.434378 | 1.709093  |
| C  | 3.275494  | -1.806645 | 0.619130  |
| C  | 0.922311  | 1.776750  | -1.221315 |
| C  | 5.899578  | 1.045365  | 0.953966  |
| C  | -4.900149 | -0.442809 | -1.170017 |
| C  | 2.983058  | -3.186337 | 1.238227  |
| H  | 0.488769  | -0.060859 | 0.997657  |
| H  | 1.964835  | 0.770082  | -2.651527 |
| H  | -1.127696 | -2.681702 | -0.758891 |
| C  | 5.998218  | 2.446865  | 0.316489  |
| H  | 6.072609  | 2.394839  | -0.789987 |
| H  | 5.128973  | 3.085071  | 0.580868  |
| H  | 6.908583  | 2.963316  | 0.682573  |
| C  | 5.843130  | 1.210594  | 2.494858  |
| H  | 5.824306  | 0.233273  | 3.019150  |
| H  | 6.736233  | 1.762328  | 2.855496  |
| H  | 4.940477  | 1.778932  | 2.801846  |
| C  | 7.162764  | 0.235491  | 0.562121  |
| H  | 8.079567  | 0.766512  | 0.893220  |
| H  | 7.172496  | -0.769742 | 1.030587  |
| H  | 7.221712  | 0.098071  | -0.537450 |
| C  | 4.054649  | -3.591270 | 2.272236  |
| H  | 5.062835  | -3.670414 | 1.815554  |
| H  | 4.109957  | -2.876745 | 3.119788  |
| H  | 3.805508  | -4.585939 | 2.694489  |
| C  | 2.949178  | -4.262283 | 0.121885  |
| H  | 2.169411  | -4.039005 | -0.632152 |
| H  | 3.928456  | -4.321819 | -0.396528 |
| H  | 2.733331  | -5.259412 | 0.559380  |
| C  | 1.609079  | -3.124569 | 1.960440  |
| H  | 1.619237  | -2.351987 | 2.758323  |
| H  | 0.787444  | -2.893237 | 1.253433  |
| H  | 1.381072  | -4.100350 | 2.437599  |
| C  | -4.643905 | -1.827551 | -1.817354 |
| H  | -3.613346 | -1.889400 | -2.211225 |
| H  | -4.784241 | -2.642673 | -1.077615 |
| H  | -5.348145 | -1.998660 | -2.658199 |
| C  | -4.722863 | 0.680276  | -2.225038 |
| H  | -4.920804 | 1.675720  | -1.776495 |
| H  | -3.697478 | 0.691112  | -2.643481 |
| H  | -5.438140 | 0.534664  | -3.061291 |
| C  | -6.356653 | -0.404791 | -0.662119 |
| H  | -6.570016 | -1.220057 | 0.059652  |
| H  | -6.604290 | 0.563971  | -0.180750 |
| H  | -7.049174 | -0.536178 | -1.518284 |
| C  | -4.686209 | -1.230566 | 4.156685  |
| H  | -5.082258 | -1.205537 | 5.193285  |
| H  | -5.549436 | -1.369098 | 3.474614  |
| H  | -4.029729 | -2.120057 | 4.060042  |
| C  | -4.854207 | 1.293116  | 3.974819  |
| H  | -5.721627 | 1.218100  | 3.287768  |
| H  | -5.252656 | 1.365300  | 5.008269  |
| H  | -4.319679 | 2.238302  | 3.744991  |
| C  | -2.773616 | 0.221719  | 4.886189  |
| H  | -2.065796 | -0.632908 | 4.853594  |
| H  | -2.198246 | 1.160617  | 4.744190  |
| H  | -3.203053 | 0.253786  | 5.908014  |
| C  | -0.579995 | -2.015289 | -3.991977 |
| C  | 0.314053  | -0.953299 | -3.816564 |
| H  | -0.154762 | -3.023210 | -4.125567 |
| H  | 1.397396  | -1.159887 | -3.857684 |
| H  | -0.019535 | 0.072879  | -4.067460 |
| C  | -1.983368 | -1.801078 | -4.482598 |
| H  | -1.931425 | -1.686557 | -5.588654 |
| H  | -2.650419 | -2.657111 | -4.272042 |
| H  | -2.431175 | -0.879644 | -4.062408 |
| C  | -0.976741 | -2.970520 | -1.843646 |
| H  | -0.238408 | -3.792574 | -1.880025 |

|  |   |           |           |           |
|--|---|-----------|-----------|-----------|
|  | H | -1.966501 | -3.274634 | -2.222748 |
|  | C | -0.637514 | 2.728627  | 0.372218  |
|  | C | 1.145904  | 3.051931  | -1.760206 |
|  | C | 0.481270  | 4.183296  | -1.245585 |
|  | C | -0.421947 | 4.017936  | -0.155174 |
|  | H | -1.355913 | 2.587935  | 1.193802  |
|  | H | 1.849888  | 3.166975  | -2.600968 |
|  | C | -1.146690 | 5.209070  | 0.422108  |
|  | H | -1.754000 | 5.726762  | -0.351006 |
|  | H | -1.824025 | 4.919055  | 1.248306  |
|  | H | -0.433049 | 5.964453  | 0.815660  |
|  | C | 0.723884  | 5.548932  | -1.838853 |
|  | H | -0.218276 | 5.993452  | -2.225289 |
|  | H | 1.111417  | 6.256533  | -1.074992 |
|  | H | 1.451709  | 5.516271  | -2.672424 |



**2 (isomer)**

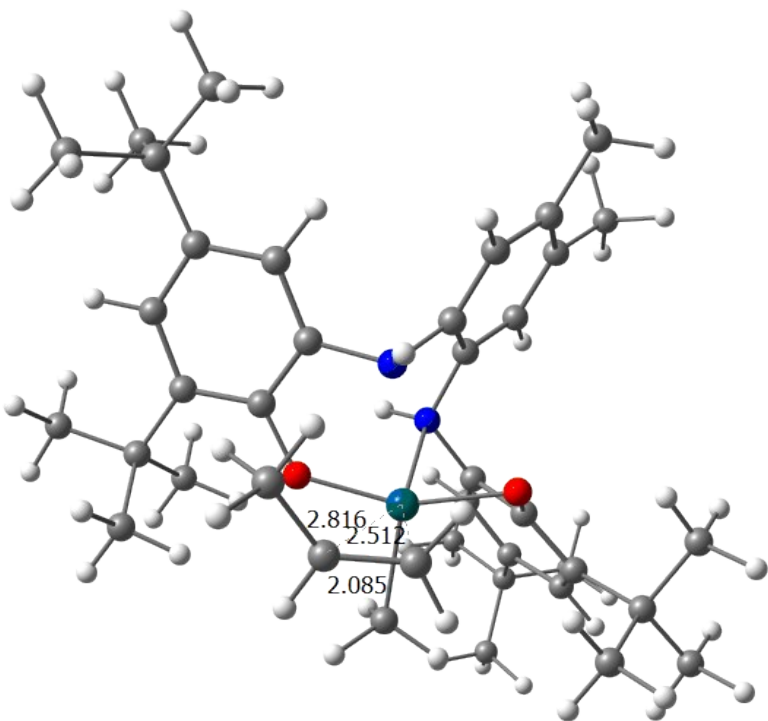

Zero-point correction= 0.879223 (Hartree/Particle)  
 Thermal correction to Energy= 0.950125  
 Thermal correction to Enthalpy= 0.951243  
 Thermal correction to Gibbs Free Energy= 0.770710  
 Sum of electronic and zero-point Energies= -1876.028700  
 Sum of electronic and thermal Energies= -1875.957799  
 Sum of electronic and thermal Enthalpies= -1875.956680  
 Sum of electronic and thermal Free Energies= -1876.137214

Solvent: -1876.5857653

104  
PhTitBuCH3+propTIsomer+PRE SCF Done: -1876.90792337 A.U.

|    |           |           |           |
|----|-----------|-----------|-----------|
| Ti | 0.488554  | -0.745498 | 1.099626  |
| N  | 0.525695  | 0.303503  | -0.797416 |
| O  | 1.665729  | 0.734486  | 1.501669  |
| C  | 2.528523  | 0.348880  | 0.536220  |
| C  | 1.940080  | 0.019703  | -0.727758 |
| C  | 2.668197  | -0.591306 | -1.766022 |
| H  | 2.150296  | -0.840330 | -2.702779 |
| C  | 4.030762  | -0.852167 | -1.580083 |
| C  | 4.623923  | -0.435204 | -0.351267 |
| H  | 5.701395  | -0.608242 | -0.230151 |
| C  | 3.938979  | 0.163518  | 0.713182  |
| C  | 0.129020  | 1.707766  | -0.708963 |
| C  | 4.899715  | -1.545687 | -2.645187 |
| N  | -1.323749 | 0.974362  | 1.102743  |
| O  | -1.049847 | -1.611671 | 0.547143  |
| C  | -2.250576 | -1.098208 | 0.209180  |
| C  | -2.451281 | 0.276222  | 0.478410  |
| C  | -3.661657 | 0.906742  | 0.165296  |
| H  | -3.767063 | 1.979808  | 0.376507  |
| C  | -4.711331 | 0.166666  | -0.413951 |
| C  | -4.488562 | -1.212156 | -0.658583 |
| H  | -5.307281 | -1.790290 | -1.106881 |
| C  | -3.289081 | -1.885934 | -0.364972 |
| C  | -0.789053 | 2.050616  | 0.294819  |
| C  | -6.068413 | 0.797517  | -0.784185 |
| C  | 4.635840  | 0.630071  | 2.003310  |
| C  | -3.077598 | -3.388416 | -0.632343 |
| H  | 0.058370  | -0.191280 | -1.572428 |
| H  | -1.607745 | 1.344583  | 2.020014  |
| H  | 1.731989  | -2.835365 | 0.267556  |
| C  | -6.122558 | 2.299453  | -0.435779 |
| H  | -5.990815 | 2.476973  | 0.652093  |
| H  | -5.351298 | 2.880773  | -0.983149 |
| H  | -7.110530 | 2.715310  | -0.719362 |
| C  | -6.298632 | 0.637584  | -2.309788 |
| H  | -6.321508 | -0.427733 | -2.617391 |
| H  | -7.269623 | 1.089601  | -2.601155 |
| H  | -5.496632 | 1.141384  | -2.888311 |
| C  | -7.197133 | 0.071030  | -0.007294 |
| H  | -8.183531 | 0.512334  | -0.260524 |
| H  | -7.244102 | -1.009408 | -0.253294 |
| H  | -7.049922 | 0.164039  | 1.088767  |
| C  | -4.332475 | -4.044679 | -1.245227 |
| H  | -5.211979 | -3.970323 | -0.572651 |
| H  | -4.601319 | -3.596175 | -2.223979 |
| H  | -4.139587 | -5.122764 | -1.418380 |
| C  | -2.758709 | -4.105096 | 0.707840  |
| H  | -1.825449 | -3.718786 | 1.162303  |
| H  | -3.589000 | -3.971310 | 1.432550  |
| H  | -2.629660 | -5.194127 | 0.537082  |
| C  | -1.898103 | -3.572203 | -1.624991 |
| H  | -2.110795 | -3.059796 | -2.586606 |
| H  | -0.951635 | -3.172394 | -1.210246 |
| H  | -1.745713 | -4.650069 | -1.841429 |
| C  | 4.083762  | -0.159999 | 3.218179  |
| H  | 3.000055  | 0.017255  | 3.348137  |
| H  | 4.258004  | -1.249664 | 3.100579  |
| H  | 4.597698  | 0.166934  | 4.145672  |
| C  | 4.356255  | 2.145139  | 2.193391  |
| H  | 4.755427  | 2.728970  | 1.338275  |
| H  | 3.271739  | 2.351215  | 2.282959  |
| H  | 4.854058  | 2.508547  | 3.116387  |
| C  | 6.162493  | 0.417355  | 1.939355  |
| H  | 6.432470  | -0.655077 | 1.844491  |
| H  | 6.626102  | 0.972849  | 1.097857  |
| H  | 6.625779  | 0.790159  | 2.875110  |
| C  | 5.465860  | -2.859028 | -2.043812 |
| H  | 6.099659  | -3.379934 | -2.791193 |
| H  | 6.092729  | -2.671672 | -1.148314 |
| H  | 4.646640  | -3.546536 | -1.747170 |
| C  | 6.066422  | -0.606411 | -3.047493 |
| H  | 6.724693  | -0.362789 | -2.188866 |
| H  | 6.697467  | -1.092393 | -3.820034 |
| H  | 5.684233  | 0.347677  | -3.465715 |
| C  | 4.091235  | -1.894320 | -3.911605 |
| H  | 3.253683  | -2.589141 | -3.691916 |
| H  | 3.678732  | -0.988715 | -4.403821 |
| H  | 4.747665  | -2.397393 | -4.649779 |
| C  | -0.874475 | -1.522450 | 3.437910  |
| C  | 0.207367  | -0.705423 | 3.595556  |
| H  | -0.691920 | -2.599917 | 3.270395  |
| H  | 0.095583  | 0.367986  | 3.825993  |
| H  | 1.223629  | -1.125117 | 3.676408  |
| C  | -2.308089 | -1.119173 | 3.529549  |
| H  | -2.867213 | -1.413446 | 2.616280  |
| H  | -2.783205 | -1.668309 | 4.371633  |
| H  | -2.442453 | -0.033875 | 3.708826  |
| C  | 1.619464  | -2.483642 | 1.321437  |



|  |   |           |           |           |
|--|---|-----------|-----------|-----------|
|  | H | 1.107063  | -3.283513 | 1.896842  |
|  | H | 2.634804  | -2.309250 | 1.734409  |
|  | C | 0.697038  | 2.692258  | -1.524714 |
|  | C | -1.129254 | 3.399748  | 0.473198  |
|  | C | -0.567950 | 4.409570  | -0.336220 |
|  | C | 0.355987  | 4.050046  | -1.360497 |
|  | H | 1.437670  | 2.396244  | -2.284981 |
|  | H | -1.841321 | 3.675281  | 1.268357  |
|  | C | 0.974453  | 5.107335  | -2.242060 |
|  | H | 1.545584  | 5.849222  | -1.643601 |
|  | H | 1.665314  | 4.669226  | -2.988006 |
|  | H | 0.198626  | 5.680876  | -2.793074 |
|  | C | -0.941672 | 5.855305  | -0.120225 |
|  | H | -0.045987 | 6.474751  | 0.099515  |
|  | H | -1.406913 | 6.291667  | -1.030102 |
|  | H | -1.654456 | 5.978714  | 0.717851  |

### 3 (isomer)

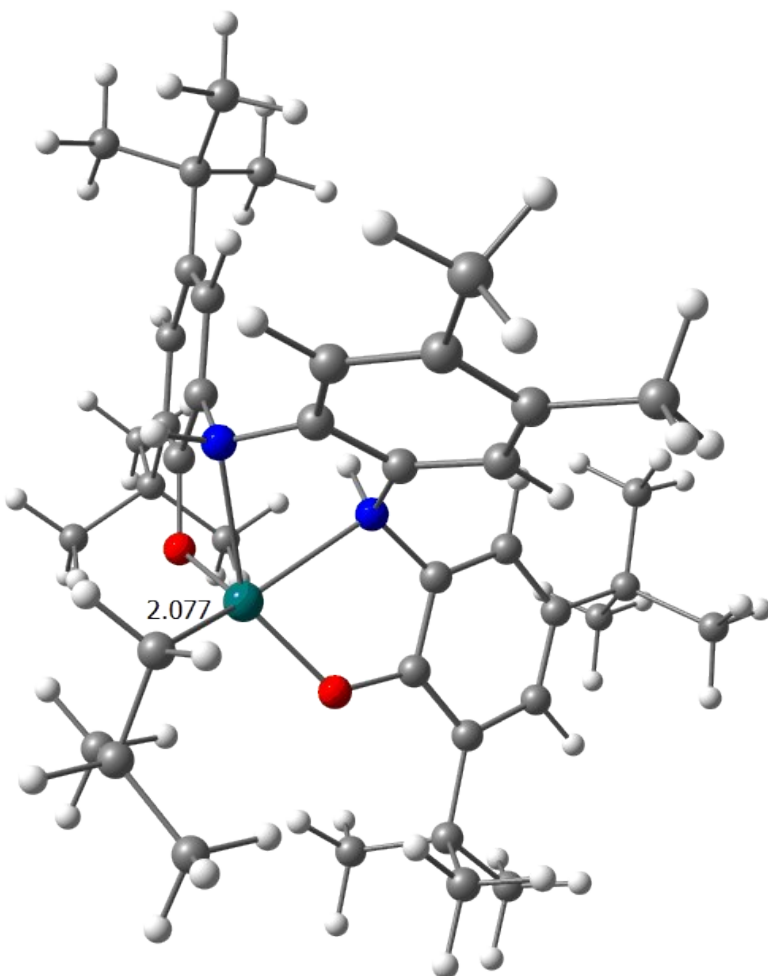

Zero-point correction= 0.882951 (Hartree/Particle)  
Thermal correction to Energy= 0.952573  
Thermal correction to Enthalpy= 0.953691  
Thermal correction to Gibbs Free Energy= 0.773603  
Sum of electronic and zero-point Energies= -1876.049379  
Sum of electronic and thermal Energies= -1875.979758  
Sum of electronic and thermal Enthalpies= -1875.978639  
Sum of electronic and thermal Free Energies= -1876.158728

Solvent: -1876.6181862

| 104                                             |           |           |
|-------------------------------------------------|-----------|-----------|
| PhTitBuCH3+propTS+POST SCF Done: -1876.93233042 |           |           |
| A.U.                                            |           |           |
| Ti                                              | -0.135037 | 0.609772  |
| N                                               | -0.184566 | -0.615476 |
| O                                               | -1.897223 | 0.711592  |
| C                                               | -2.367196 | 0.360303  |
| C                                               | -1.457563 | -0.360929 |
| C                                               | -1.759483 | -0.768038 |
| H                                               | -1.004680 | -1.319535 |
| C                                               | -3.023842 | -0.453168 |
| C                                               | -3.927238 | 0.260343  |
| H                                               | -4.913020 | 0.503411  |
| C                                               | -3.654138 | 0.689693  |
| C                                               | 0.058321  | -1.928869 |
| C                                               | -3.443553 | -0.851248 |
| N                                               | 1.714987  | -0.682247 |
| O                                               | 1.101603  | 1.759784  |
| C                                               | 2.215294  | 1.290672  |
| C                                               | 2.579820  | -0.043690 |
| C                                               | 3.655031  | -0.682966 |
| H                                               | 3.876501  | -1.728051 |
| C                                               | 4.414638  | 0.032014  |
| C                                               | 4.030741  | 1.368323  |
| H                                               | 4.616714  | 1.918666  |
| C                                               | 2.941559  | 2.036542  |
| C                                               | 1.105311  | -1.961314 |
| C                                               | 5.624493  | -0.582905 |
| C                                               | -4.679905 | 1.449020  |
| C                                               | 2.507326  | 3.461069  |
| H                                               | 0.615790  | -0.328514 |
| H                                               | 2.184023  | -0.703490 |
| H                                               | -0.994561 | 2.741510  |
| C                                               | 5.861847  | -2.051098 |
| H                                               | 6.081482  | -2.149301 |
| H                                               | 4.991886  | -2.696945 |
| H                                               | 6.735531  | -2.457839 |
| C                                               | 5.376183  | -0.534956 |
| H                                               | 5.249532  | 0.502852  |
| H                                               | 6.237343  | -0.977049 |
| H                                               | 4.466210  | -1.108192 |
| C                                               | 6.893317  | 0.237656  |
| H                                               | 7.780145  | -0.187032 |
| H                                               | 6.802322  | 1.297857  |
| H                                               | 7.088875  | 0.221555  |
| C                                               | 3.455502  | 4.082916  |
| H                                               | 4.494644  | 4.168814  |
| H                                               | 3.474072  | 3.502893  |
| H                                               | 3.109538  | 5.106346  |
| C                                               | 2.503339  | 4.369450  |
| H                                               | 1.800093  | 3.998915  |
| H                                               | 3.516502  | 4.425417  |
| H                                               | 2.195783  | 5.399155  |
| C                                               | 1.081622  | 3.390773  |
| H                                               | 1.071850  | 2.743672  |
| H                                               | 0.341696  | 2.994267  |
| H                                               | 0.748282  | 4.404072  |
| C                                               | -4.073103 | 2.792205  |
| H                                               | -3.182880 | 2.634754  |
| H                                               | -3.776871 | 3.426298  |
| H                                               | -4.822830 | 3.353238  |
| C                                               | -5.046805 | 0.557628  |
| H                                               | -5.530578 | -0.383215 |
| H                                               | -4.150834 | 0.289747  |
| H                                               | -5.753960 | 1.090319  |
| C                                               | -5.972124 | 1.762511  |
| H                                               | -5.776830 | 2.405928  |
| H                                               | -6.489289 | 0.842672  |
| H                                               | -6.678472 | 2.308546  |
| C                                               | -3.761757 | 0.431771  |
| H                                               | -4.066210 | 0.168386  |
| H                                               | -4.589763 | 1.013793  |
| H                                               | -2.873765 | 1.094482  |
| C                                               | -4.705076 | -1.750151 |
| H                                               | -5.563423 | -1.226080 |
| H                                               | -5.018287 | -2.056111 |
| H                                               | -4.506759 | -2.669461 |
| C                                               | -2.330897 | -1.629985 |
| H                                               | -1.405371 | -1.027112 |
| H                                               | -2.073304 | -2.576143 |
| H                                               | -2.670582 | -1.900442 |
| C                                               | -0.859668 | 1.516429  |
| C                                               | -0.066026 | 0.304834  |
| H                                               | -0.463257 | 1.725266  |
| H                                               | 0.985466  | 0.330177  |
| H                                               | -0.510997 | -0.678513 |
| C                                               | -2.364591 | 1.238742  |
| H                                               | -2.553970 | 0.370650  |
| H                                               | -2.897100 | 2.114372  |
| H                                               | -2.815421 | 1.018091  |
| C                                               | -0.582597 | 2.790245  |

|  |   |           |           |           |
|--|---|-----------|-----------|-----------|
|  | H | 0.499375  | 3.024344  | 3.501376  |
|  | H | -1.094623 | 3.671905  | 4.006014  |
|  | C | -0.691153 | -3.082468 | 0.219575  |
|  | C | 1.412616  | -3.156283 | 2.090019  |
|  | C | 0.673062  | -4.329212 | 1.833051  |
|  | C | -0.397706 | -4.289130 | 0.888204  |
|  | H | -1.519965 | -3.032443 | -0.502644 |
|  | H | 2.228993  | -3.171436 | 2.830050  |
|  | C | -1.208995 | -5.529134 | 0.606941  |
|  | H | -1.679309 | -5.922766 | 1.533210  |
|  | H | -2.013576 | -5.338231 | -0.128754 |
|  | H | -0.569689 | -6.346685 | 0.209855  |
|  | C | 1.005414  | -5.611280 | 2.554619  |
|  | H | 0.138928  | -5.977101 | 3.146121  |
|  | H | 1.257738  | -6.421868 | 1.838046  |
|  | H | 1.861546  | -5.488650 | 3.245403  |

**4 (isomer)**

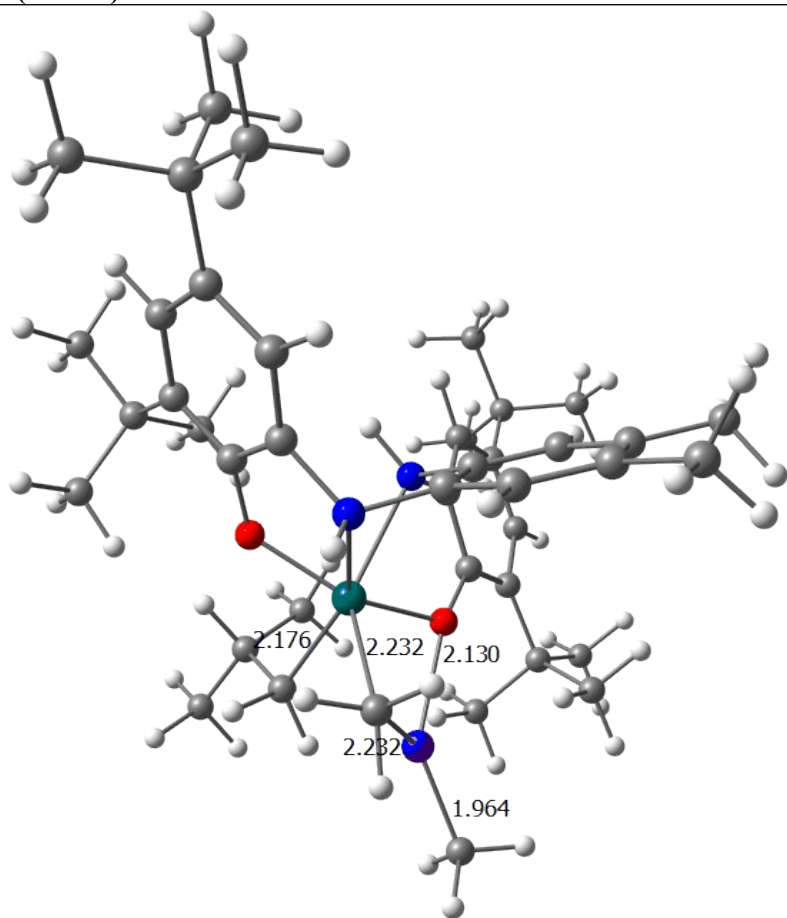

Zero-point correction= 0.954313 (Hartree/Particle)  
 Thermal correction to Energy= 1.032545  
 Thermal correction to Enthalpy= 1.033663  
 Thermal correction to Gibbs Free Energy= 0.836833  
 Sum of electronic and zero-point Energies= -3735.168139  
 Sum of electronic and thermal Energies= -3735.089907  
 Sum of electronic and thermal Enthalpies= -3735.088789  
 Sum of electronic and thermal Free Energies= -3735.285619

Solvent: -3735.526822

113  
 PhTi(tBu)CH<sub>3</sub>+propTS+POST--ZnMe<sub>2</sub>min0c SCF Done: -3736.12245209 A.U.

|    |           |           |           |
|----|-----------|-----------|-----------|
| Ti | -0.095638 | -0.824467 | -1.376308 |
| N  | 0.206704  | 0.611800  | 0.348869  |
| O  | -1.858675 | -0.124776 | -0.923043 |
| C  | -2.158613 | 0.283797  | 0.355459  |
| C  | -1.013357 | 0.588515  | 1.126405  |
| C  | -1.075571 | 0.885345  | 2.489693  |
| H  | -0.145271 | 1.106144  | 3.031266  |
| C  | -2.332901 | 0.907627  | 3.125762  |
| C  | -3.472880 | 0.691051  | 2.316657  |
| H  | -4.455573 | 0.752232  | 2.801456  |
| C  | -3.448505 | 0.391298  | 0.936163  |
| C  | 0.393739  | 1.842211  | -0.424603 |
| C  | -2.498734 | 1.178624  | 4.633714  |
| N  | 1.766277  | 0.474566  | -1.893961 |
| O  | 1.351025  | -1.737873 | -0.624350 |
| C  | 2.546838  | -1.172002 | -0.320818 |
| C  | 2.839006  | 0.030160  | -0.996697 |
| C  | 4.020647  | 0.749236  | -0.783600 |
| H  | 4.178433  | 1.689527  | -1.330485 |
| C  | 4.965241  | 0.254008  | 0.136062  |
| C  | 4.646155  | -0.945983 | 0.821111  |
| H  | 5.372398  | -1.321726 | 1.553964  |
| C  | 3.460103  | -1.684934 | 0.642317  |
| C  | 1.186719  | 1.761319  | -1.588659 |
| C  | 6.299326  | 0.969023  | 0.428551  |
| C  | -4.746473 | 0.216619  | 0.123459  |
| C  | 3.127877  | -2.949387 | 1.453970  |
| H  | 1.046201  | 0.385972  | 0.910464  |
| H  | 2.078356  | 0.444308  | -2.875807 |
| H  | -2.744634 | -2.806641 | 0.508859  |
| C  | 6.461955  | 2.252419  | -0.412325 |
| H  | 6.456108  | 2.036951  | -1.501312 |
| H  | 5.665666  | 2.995325  | -0.195905 |
| H  | 7.432576  | 2.735337  | -0.179073 |
| C  | 6.350945  | 1.355343  | 1.929588  |
| H  | 6.286534  | 0.467186  | 2.590796  |
| H  | 7.304584  | 1.873728  | 2.161671  |
| H  | 5.515786  | 2.037388  | 2.193490  |
| C  | 7.472558  | 0.011530  | 0.094940  |
| H  | 8.444054  | 0.508424  | 0.298182  |
| H  | 7.439940  | -0.915589 | 0.702964  |
| H  | 7.453634  | -0.283642 | -0.974612 |
| C  | 4.247343  | -3.311465 | 2.452270  |
| H  | 5.209210  | -3.524527 | 1.941642  |
| H  | 4.418193  | -2.509284 | 3.200207  |
| H  | 3.962107  | -4.226162 | 3.010690  |
| C  | 2.936613  | -4.144733 | 0.484971  |
| H  | 2.151014  | -3.941400 | -0.268074 |
| H  | 3.880504  | -4.363544 | -0.055307 |
| H  | 2.645721  | -5.054897 | 1.049610  |
| C  | 1.827943  | -2.686816 | 2.261876  |
| H  | 1.975759  | -1.852479 | 2.979887  |
| H  | 0.978065  | -2.433483 | 1.600864  |
| H  | 1.545504  | -3.588404 | 2.844132  |
| C  | -4.882429 | -1.257189 | -0.328495 |
| H  | -3.993154 | -1.603265 | -0.888372 |
| H  | -5.006774 | -1.925303 | 0.548076  |
| H  | -5.760947 | -1.384842 | -0.992923 |
| C  | -4.703754 | 1.176517  | -1.093984 |
| H  | -4.635779 | 2.231144  | -0.756171 |
| H  | -3.839886 | 0.975594  | -1.755159 |
| H  | -5.624850 | 1.067858  | -1.702420 |
| C  | -6.003524 | 0.569101  | 0.949423  |
| H  | -6.138815 | -0.106679 | 1.818571  |
| H  | -5.980799 | 1.615702  | 1.317214  |
| H  | -6.903308 | 0.460229  | 0.310496  |
| C  | -3.207928 | -0.036663 | 5.286231  |
| H  | -3.331057 | 0.129748  | 6.376677  |
| H  | -4.217204 | -0.207259 | 4.859460  |
| H  | -2.617028 | -0.965132 | 5.143515  |
| C  | -3.356021 | 2.454829  | 4.833809  |
| H  | -4.369543 | 2.349114  | 4.395955  |
| H  | -3.482315 | 2.668277  | 5.915679  |
| H  | -2.872490 | 3.336445  | 4.363837  |
| C  | -1.139727 | 1.385234  | 5.334220  |
| H  | -0.486385 | 0.492512  | 5.241542  |
| H  | -0.593910 | 2.264459  | 4.932097  |
| H  | -1.298025 | 1.566032  | 6.416594  |
| C  | -0.932873 | -3.647812 | -0.409953 |
| C  | -0.968401 | -2.791301 | -1.702341 |
| H  | 0.134762  | -3.730596 | -0.119378 |
| H  | -0.254085 | -3.197177 | -2.455110 |
| H  | -1.979820 | -2.981971 | -2.163380 |
| C  | -1.461335 | -5.065981 | -0.696443 |
| H  | -0.912881 | -5.543891 | -1.534438 |
| H  | -1.353044 | -5.717739 | 0.196317  |
| H  | -2.540011 | -5.042091 | -0.965617 |
| C  | -1.686308 | -3.010409 | 0.767020  |

|  |    |           |           |           |
|--|----|-----------|-----------|-----------|
|  | H  | -1.239941 | -2.047141 | 1.090347  |
|  | H  | -1.674091 | -3.679764 | 1.651070  |
|  | C  | -0.255925 | 3.045552  | -0.114464 |
|  | C  | 1.322449  | 2.882717  | -2.421384 |
|  | C  | 0.672800  | 4.095957  | -2.119975 |
|  | C  | -0.125308 | 4.179111  | -0.940003 |
|  | H  | -0.888216 | 3.091684  | 0.784870  |
|  | H  | 1.943574  | 2.804128  | -3.328571 |
|  | C  | -0.828407 | 5.465342  | -0.583188 |
|  | H  | -1.522461 | 5.783302  | -1.390429 |
|  | H  | -1.413832 | 5.369371  | 0.351299  |
|  | H  | -0.104710 | 6.297591  | -0.448239 |
|  | C  | 0.822099  | 5.291764  | -3.026458 |
|  | H  | -0.164570 | 5.637174  | -3.402740 |
|  | H  | 1.266518  | 6.153285  | -2.483550 |
|  | H  | 1.463746  | 5.073520  | -3.901743 |
|  | Zn | -2.409419 | -1.072053 | -2.749965 |
|  | C  | -0.402860 | -0.538882 | -3.568568 |
|  | H  | -0.211663 | 0.539108  | -3.760154 |
|  | H  | 0.532230  | -1.128320 | -3.717509 |
|  | H  | -1.025493 | -0.889995 | -4.425347 |
|  | C  | -4.081992 | -1.356535 | -3.740310 |
|  | H  | -3.887716 | -1.451865 | -4.829706 |
|  | H  | -4.583893 | -2.286500 | -3.399290 |
|  | H  | -4.789245 | -0.515920 | -3.588852 |

4-5 (isomer)

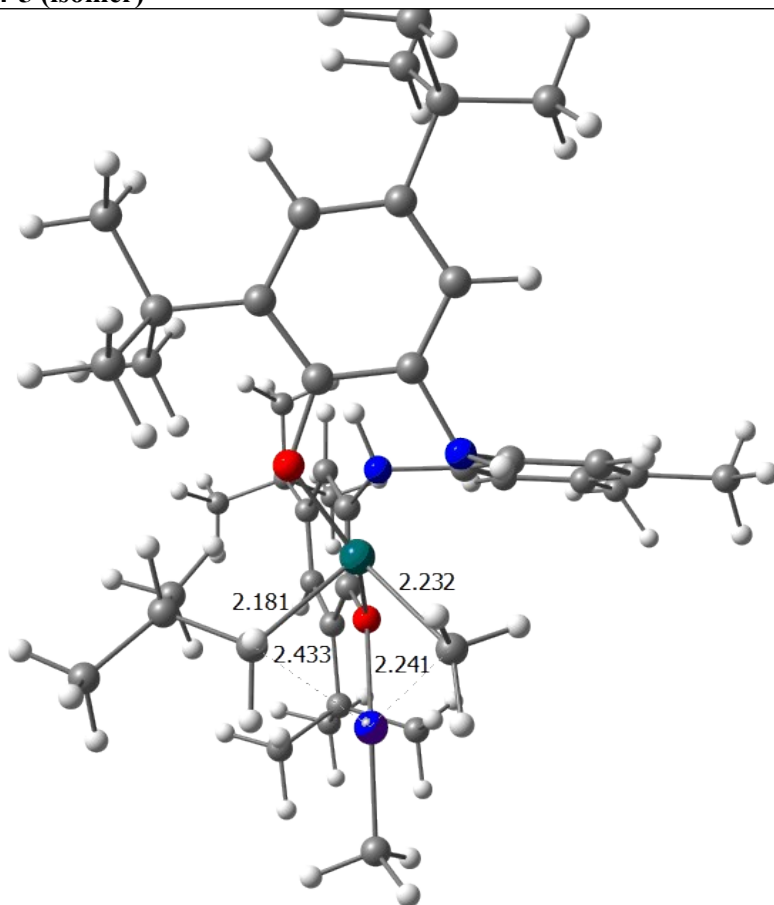

Zero-point correction= 0.954340 (Hartree/Particle)  
 Thermal correction to Energy= 1.031433  
 Thermal correction to Enthalpy= 1.032551  
 Thermal correction to Gibbs Free Energy= 0.839639  
 Sum of electronic and zero-point Energies= -3735.168036  
 Sum of electronic and thermal Energies= -3735.090943  
 Sum of electronic and thermal Enthalpies= -3735.089825  
 Sum of electronic and thermal Free Energies= -3735.282738

Solvent: -3735.5270891

113

PhTi(Bu)CH<sub>3</sub>+propTS+POST--ZnMe<sub>2</sub>min0TS SCF Done: -3736.12237611 A.U.

|    |           |           |           |
|----|-----------|-----------|-----------|
| Ti | -0.071364 | -1.142621 | -1.108743 |
| N  | 0.183012  | 0.684312  | 0.211794  |
| O  | -1.855129 | -0.402243 | -0.838233 |
| C  | -2.177605 | 0.327273  | 0.281195  |
| C  | -1.048692 | 0.844835  | 0.955943  |
| C  | -1.137323 | 1.511497  | 2.180242  |
| H  | -0.218579 | 1.885679  | 2.653252  |
| C  | -2.406734 | 1.703281  | 2.761285  |
| C  | -3.529944 | 1.252704  | 2.029078  |
| H  | -4.521302 | 1.439099  | 2.461334  |
| C  | -3.478835 | 0.574947  | 0.790757  |
| C  | 0.366047  | 1.690317  | -0.840046 |
| C  | -2.604925 | 2.395689  | 4.123567  |
| N  | 1.763716  | 0.018223  | -1.914576 |
| O  | 1.381462  | -1.825760 | -0.150482 |
| C  | 2.573138  | -1.193134 | 0.000850  |
| C  | 2.841321  | -0.176502 | -0.937657 |
| C  | 4.008887  | 0.594035  | -0.907329 |
| H  | 4.144376  | 1.386175  | -1.657100 |
| C  | 4.968555  | 0.338984  | 0.091069  |
| C  | 4.681329  | -0.684713 | 1.029812  |
| H  | 5.424407  | -0.876047 | 1.815227  |
| C  | 3.508806  | -1.465951 | 1.037681  |
| C  | 1.171767  | 1.334494  | -1.941357 |
| C  | 6.290115  | 1.126640  | 0.198406  |
| C  | -4.761168 | 0.161491  | 0.042321  |
| C  | 3.215455  | -2.532987 | 2.107664  |
| H  | 1.016415  | 0.621768  | 0.822300  |
| H  | 2.081417  | -0.251568 | -2.857370 |
| H  | -2.644107 | -2.523042 | 1.135069  |
| C  | 6.408883  | 2.205536  | -0.897942 |
| H  | 6.397586  | 1.764597  | -1.916729 |
| H  | 5.594570  | 2.957338  | -0.830720 |
| H  | 7.368421  | 2.750118  | -0.787380 |
| C  | 6.357215  | 1.824013  | 1.581843  |
| H  | 6.330255  | 1.095237  | 2.417557  |
| H  | 7.300212  | 2.401820  | 1.676389  |
| H  | 5.508537  | 2.526992  | 1.714961  |
| C  | 7.478832  | 0.141819  | 0.051673  |
| H  | 8.442743  | 0.687812  | 0.120894  |
| H  | 7.476381  | -0.632060 | 0.846035  |
| H  | 7.446247  | -0.377428 | -0.928483 |
| C  | 4.359887  | -2.655692 | 3.135454  |
| H  | 5.315938  | -2.956176 | 2.659123  |
| H  | 4.526740  | -1.709683 | 3.691297  |
| H  | 4.104210  | -3.435518 | 3.881288  |
| C  | 3.030973  | -3.909802 | 1.418298  |
| H  | 2.229003  | -3.881250 | 0.655381  |
| H  | 3.969256  | -4.226636 | 0.918293  |
| H  | 2.764644  | -4.682261 | 2.169531  |
| C  | 1.922697  | -2.129062 | 2.866380  |
| H  | 2.058656  | -1.155544 | 3.383155  |
| H  | 1.056967  | -2.043945 | 2.183044  |
| H  | 1.673552  | -2.889170 | 3.635722  |
| C  | -4.872938 | -1.381873 | 0.012884  |
| H  | -3.978826 | -1.856666 | -0.433668 |
| H  | -4.988421 | -1.784821 | 1.039686  |
| H  | -5.748403 | -1.700334 | -0.588639 |
| C  | -4.712636 | 0.751280  | -1.391104 |
| H  | -4.672299 | 1.859412  | -1.353859 |
| H  | -3.831622 | 0.399581  | -1.960382 |
| H  | -5.618797 | 0.458142  | -1.959921 |
| C  | -6.035865 | 0.707725  | 0.723525  |
| H  | -6.179024 | 0.295725  | 1.743531  |
| H  | -6.031088 | 1.815414  | 0.788913  |
| H  | -6.923255 | 0.414036  | 0.126862  |
| C  | -3.327025 | 1.415696  | 5.084616  |
| H  | -3.470086 | 1.887419  | 6.079053  |
| H  | -4.328668 | 1.125440  | 4.706794  |
| H  | -2.734684 | 0.487839  | 5.224759  |
| C  | -3.468398 | 3.668809  | 3.928600  |
| H  | -4.472003 | 3.432772  | 3.519855  |
| H  | -3.617760 | 4.185302  | 4.899644  |
| H  | -2.976350 | 4.380475  | 3.233235  |
| C  | -1.262041 | 2.807030  | 4.761969  |
| H  | -0.604183 | 1.931416  | 4.943013  |
| H  | -0.709891 | 3.538846  | 4.135509  |
| H  | -1.444978 | 3.290130  | 5.743049  |
| C  | -0.881587 | -3.669596 | 0.491175  |
| C  | -0.884903 | -3.161457 | -0.975340 |
| H  | 0.182525  | -3.717721 | 0.802316  |
| H  | -0.112522 | -3.691339 | -1.578997 |
| H  | -1.853314 | -3.528882 | -1.420052 |
| C  | -1.465807 | -5.092513 | 0.564721  |
| H  | -0.944622 | -5.782895 | -0.130308 |
| H  | -1.372699 | -5.508265 | 1.590323  |
| H  | -2.545863 | -5.093437 | 0.299995  |
| C  | -1.607151 | -2.728836 | 1.466151  |

|  |    |           |           |           |
|--|----|-----------|-----------|-----------|
|  | H  | -1.099498 | -1.746982 | 1.574613  |
|  | H  | -1.653269 | -3.172108 | 2.481598  |
|  | C  | -0.296866 | 2.926338  | -0.842819 |
|  | C  | 1.307892  | 2.215990  | -3.024391 |
|  | C  | 0.646540  | 3.459773  | -3.037247 |
|  | C  | -0.166496 | 3.822196  | -1.922171 |
|  | H  | -0.940486 | 3.187829  | 0.010344  |
|  | H  | 1.938044  | 1.921540  | -3.879507 |
|  | C  | -0.885622 | 5.148268  | -1.901535 |
|  | H  | -1.575627 | 5.246559  | -2.766833 |
|  | H  | -1.478470 | 5.281431  | -0.976339 |
|  | H  | -0.171113 | 5.996041  | -1.974450 |
|  | C  | 0.797341  | 4.395017  | -4.210418 |
|  | H  | -0.187165 | 4.625443  | -4.670840 |
|  | H  | 1.228774  | 5.369026  | -3.894700 |
|  | H  | 1.451423  | 3.972771  | -4.997417 |
|  | Zn | -2.365530 | -1.812692 | -2.356144 |
|  | C  | -0.384789 | -1.372611 | -3.306442 |
|  | H  | -0.224649 | -0.352545 | -3.717941 |
|  | H  | 0.556354  | -1.966857 | -3.365459 |
|  | H  | -1.028217 | -1.892161 | -4.056328 |
|  | C  | -4.023510 | -2.393147 | -3.237076 |
|  | H  | -3.816762 | -2.781957 | -4.256864 |
|  | H  | -4.509883 | -3.203910 | -2.654726 |
|  | H  | -4.749929 | -1.560100 | -3.327787 |

**5 (isomer)**

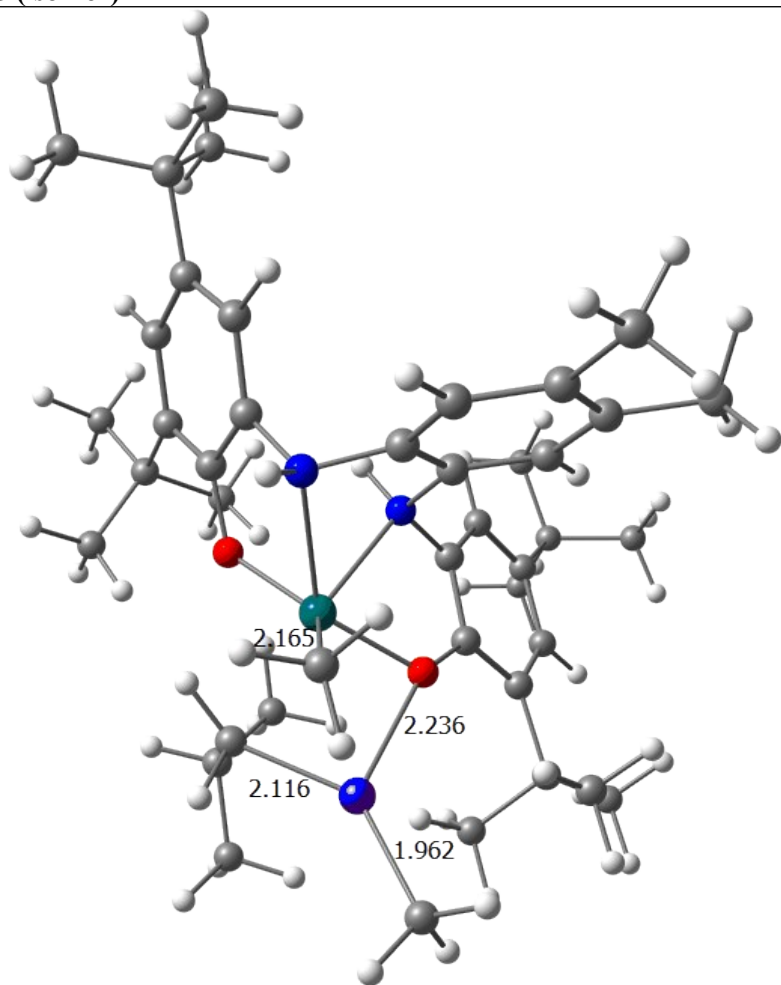

Zero-point correction= 0.953928 (Hartree/Particle)  
 Thermal correction to Energy= 1.032242  
 Thermal correction to Enthalpy= 1.033360  
 Thermal correction to Gibbs Free Energy= 0.836112  
 Sum of electronic and zero-point Energies= -3735.169517  
 Sum of electronic and thermal Energies= -3735.091204  
 Sum of electronic and thermal Enthalpies= -3735.090085  
 Sum of electronic and thermal Free Energies= -3735.287334

Solvent: -3735.5261814

113  
 PhTi(tBu)CH<sub>3</sub>+propTS+POST--ZnMe<sub>2</sub>min SCF Done: -  
 3736.12344539 A.U.

|    |           |           |           |
|----|-----------|-----------|-----------|
| Ti | -0.137022 | -1.305212 | -0.908452 |
| N  | 0.257412  | 0.756152  | -0.027277 |
| O  | -1.859179 | -0.472819 | -0.719529 |
| C  | -2.106269 | 0.517777  | 0.204719  |
| C  | -0.937148 | 1.145461  | 0.687325  |
| C  | -0.953341 | 2.099322  | 1.707924  |
| H  | -0.003660 | 2.542537  | 2.038742  |
| C  | -2.188977 | 2.476856  | 2.269989  |
| C  | -3.354630 | 1.899070  | 1.716125  |
| H  | -4.320952 | 2.221725  | 2.124110  |
| C  | -3.376693 | 0.931650  | 0.686562  |
| C  | 0.503785  | 1.487860  | -1.266126 |
| C  | -2.305745 | 3.493534  | 3.422012  |
| N  | 1.798725  | -0.471989 | -1.849593 |
| O  | 1.228186  | -1.797801 | 0.285792  |
| C  | 2.469715  | -1.253104 | 0.322425  |
| C  | 2.845311  | -0.522962 | -0.822774 |
| C  | 4.084889  | 0.115869  | -0.939553 |
| H  | 4.307234  | 0.684212  | -1.853605 |
| C  | 5.004239  | 0.019721  | 0.122747  |
| C  | 4.600932  | -0.700967 | 1.276138  |
| H  | 5.308632  | -0.754498 | 2.114195  |
| C  | 3.352565  | -1.334380 | 1.434774  |
| C  | 1.323283  | 0.843093  | -2.214242 |
| C  | 6.401512  | 0.670414  | 0.076287  |
| C  | -4.704548 | 0.383180  | 0.128110  |
| C  | 2.905628  | -1.995977 | 2.751040  |
| H  | 1.099035  | 0.749743  | 0.575882  |
| H  | 2.088995  | -0.996089 | -2.688765 |
| H  | -2.320595 | -1.869676 | 1.512809  |
| C  | 6.636474  | 1.435371  | -1.242885 |
| H  | 6.578419  | 0.766048  | -2.126640 |
| H  | 5.907356  | 2.261743  | -1.378723 |
| H  | 7.648926  | 1.887622  | -1.240923 |
| C  | 6.541238  | 1.669930  | 1.253425  |
| H  | 6.439465  | 1.171245  | 2.238851  |
| H  | 7.539121  | 2.155270  | 1.229728  |
| H  | 5.770042  | 2.465900  | 1.192539  |
| C  | 7.477674  | -0.438994 | 0.202415  |
| H  | 8.494510  | 0.005277  | 0.174047  |
| H  | 7.384832  | -1.000058 | 1.154778  |
| H  | 7.397059  | -1.168562 | -0.629917 |
| C  | 4.048285  | -2.058629 | 3.786168  |
| H  | 4.907858  | -2.653669 | 3.414007  |
| H  | 4.417039  | -1.051300 | 4.069743  |
| H  | 3.682631  | -2.545504 | 4.713071  |
| C  | 2.409050  | -3.441951 | 2.492702  |
| H  | 1.546514  | -3.463849 | 1.800103  |
| H  | 3.219075  | -4.062684 | 2.057063  |
| H  | 2.096026  | -3.911808 | 3.448137  |
| C  | 1.759022  | -1.127780 | 3.338409  |
| H  | 2.126696  | -0.111749 | 3.592601  |
| H  | 0.919143  | -1.021322 | 2.622429  |
| H  | 1.354273  | -1.587334 | 4.264196  |
| C  | -4.848110 | -1.102037 | 0.531944  |
| H  | -4.016697 | -1.714503 | 0.133304  |
| H  | -4.847432 | -1.218827 | 1.634540  |
| H  | -5.788986 | -1.532168 | 0.131997  |
| C  | -4.711734 | 0.546740  | -1.413408 |
| H  | -4.656020 | 1.619944  | -1.689764 |
| H  | -3.861685 | 0.025862  | -1.891412 |
| H  | -5.645259 | 0.128182  | -1.841783 |
| C  | -5.929816 | 1.139831  | 0.687131  |
| H  | -6.040219 | 1.015433  | 1.784077  |
| H  | -5.887038 | 2.224622  | 0.458366  |
| H  | -6.851596 | 0.738340  | 0.219374  |
| C  | -3.020334 | 2.819145  | 4.621499  |
| H  | -3.115744 | 3.535623  | 5.463749  |
| H  | -4.042098 | 2.476966  | 4.358814  |
| H  | -2.448304 | 1.938753  | 4.980928  |
| C  | -3.131490 | 4.714754  | 2.940334  |
| H  | -4.158787 | 4.428522  | 2.635297  |
| H  | -3.222621 | 5.463761  | 3.754349  |
| H  | -2.644439 | 5.207435  | 2.073096  |
| C  | -0.923467 | 3.990527  | 3.893980  |
| H  | -0.288561 | 3.158009  | 4.263146  |
| H  | -0.373514 | 4.522380  | 3.089357  |
| H  | -1.046838 | 4.706018  | 4.732035  |
| C  | -1.495168 | -3.808704 | 0.892128  |
| C  | -1.027327 | -3.429061 | -0.538358 |
| H  | -0.745366 | -4.523829 | 1.303515  |
| H  | 0.086946  | -3.460102 | -0.607913 |
| H  | -1.271558 | -4.253007 | -1.253440 |
| C  | -2.851774 | -4.532272 | 0.838646  |
| H  | -2.807486 | -5.443665 | 0.207253  |
| H  | -3.189289 | -4.831883 | 1.851718  |
| H  | -3.639920 | -3.871417 | 0.412723  |
| C  | -1.558186 | -2.602445 | 1.846271  |



|  |    |           |           |           |
|--|----|-----------|-----------|-----------|
|  | H  | -0.585011 | -2.077380 | 1.914710  |
|  | H  | -1.828344 | -2.919357 | 2.873947  |
|  | C  | -0.091950 | 2.716525  | -1.582411 |
|  | C  | 1.553382  | 1.438270  | -3.462358 |
|  | C  | 0.963849  | 2.675599  | -3.792158 |
|  | C  | 0.127031  | 3.324329  | -2.834741 |
|  | H  | -0.747761 | 3.199298  | -0.842397 |
|  | H  | 2.191231  | 0.921075  | -4.197328 |
|  | C  | -0.521213 | 4.646782  | -3.161798 |
|  | H  | -1.172668 | 4.565438  | -4.058229 |
|  | H  | -1.140205 | 5.020971  | -2.323966 |
|  | H  | 0.238837  | 5.421978  | -3.398029 |
|  | C  | 1.211417  | 3.304304  | -5.140284 |
|  | H  | 0.259888  | 3.465919  | -5.690556 |
|  | H  | 1.684308  | 4.304355  | -5.036164 |
|  | H  | 1.870485  | 2.681067  | -5.774780 |
|  | Zn | -2.527863 | -2.405267 | -1.624417 |
|  | C  | -0.358134 | -1.876231 | -2.985226 |
|  | H  | -0.160350 | -0.953957 | -3.575754 |
|  | H  | 0.426141  | -2.637492 | -3.195198 |
|  | H  | -1.295454 | -2.292112 | -3.428979 |
|  | C  | -4.142850 | -2.689999 | -2.701185 |
|  | H  | -4.232500 | -1.917130 | -3.493589 |
|  | H  | -4.111893 | -3.685492 | -3.193570 |
|  | H  | -5.058778 | -2.644890 | -2.077794 |

**6 (isomer)**

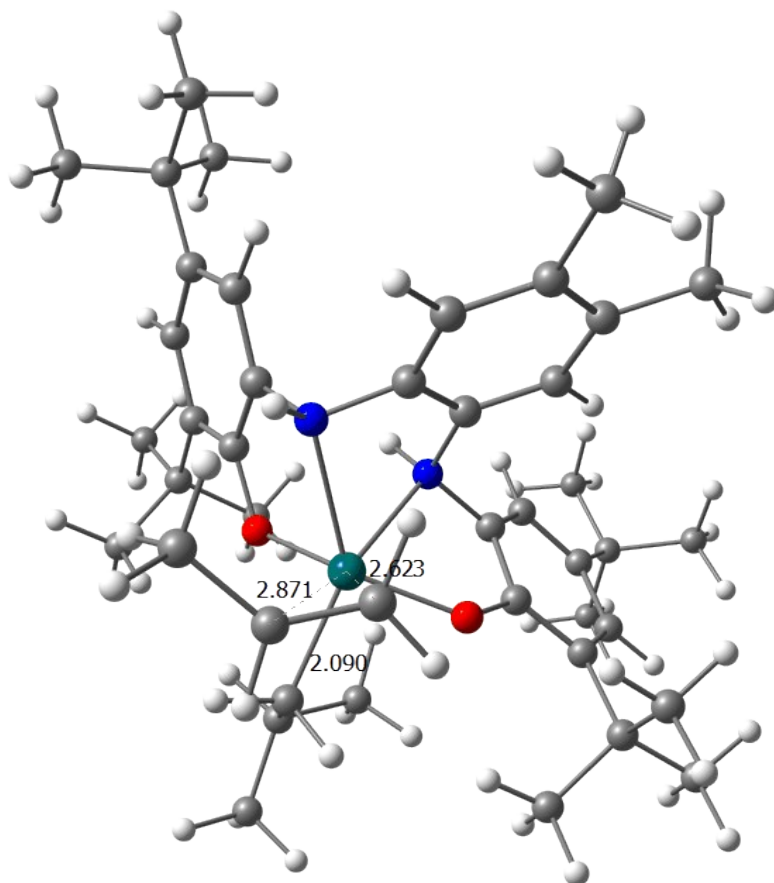

Zero-point correction= 0.963588 (Hartree/Particle)  
 Thermal correction to Energy= 1.039421  
 Thermal correction to Enthalpy= 1.040540  
 Thermal correction to Gibbs Free Energy= 0.849925  
 Sum of electronic and zero-point Energies= -1993.805311  
 Sum of electronic and thermal Energies= -1993.729478  
 Sum of electronic and thermal Enthalpies= -1993.728360  
 Sum of electronic and thermal Free Energies= -1993.918975

Solvent: -1994.4254334

113  
 PhTitBuCH3+propTS2+PRE SCF Done: -1994.76889968  
 A.U.

|    |           |           |           |
|----|-----------|-----------|-----------|
| Ti | -0.073064 | -0.372587 | -1.717132 |
| N  | -0.200369 | 0.368625  | 0.484684  |
| O  | -1.836601 | 0.190289  | -1.431834 |
| C  | -2.452618 | 0.147896  | -0.225623 |
| C  | -1.571820 | 0.126130  | 0.879642  |
| C  | -2.019205 | -0.076916 | 2.187603  |
| H  | -1.290415 | -0.098132 | 3.009577  |
| C  | -3.403186 | -0.234810 | 2.414484  |
| C  | -4.273702 | -0.127420 | 1.300285  |
| H  | -5.351741 | -0.216517 | 1.488676  |
| C  | -3.854763 | 0.072648  | -0.031212 |
| C  | 0.094606  | 1.782392  | 0.247133  |
| C  | -3.988406 | -0.499995 | 3.815873  |
| N  | 1.741018  | 1.018899  | -1.394873 |
| O  | 1.238566  | -1.496104 | -0.978473 |
| C  | 2.337328  | -1.059435 | -0.321780 |
| C  | 2.687847  | 0.288285  | -0.539074 |
| C  | 3.801609  | 0.889064  | 0.058901  |
| H  | 4.006045  | 1.951476  | -0.136213 |
| C  | 4.617702  | 0.119100  | 0.909232  |
| C  | 4.240644  | -1.229824 | 1.134429  |
| H  | 4.866497  | -1.824335 | 1.813129  |
| C  | 3.118790  | -1.859029 | 0.561212  |
| C  | 1.061079  | 2.109968  | -0.727134 |
| C  | 5.870015  | 0.689015  | 1.604826  |
| C  | -4.830193 | 0.233737  | -1.212789 |
| C  | 2.721935  | -3.312808 | 0.873775  |
| H  | 0.493912  | -0.073781 | 1.109659  |
| H  | 2.229556  | 1.375696  | -2.228504 |
| H  | -2.821119 | -2.639753 | -1.067175 |
| C  | 6.113161  | 2.167060  | 1.235045  |
| H  | 6.276930  | 2.300331  | 0.145027  |
| H  | 5.268852  | 2.817854  | 1.545646  |
| H  | 7.020992  | 2.540059  | 1.751081  |
| C  | 5.687214  | 0.591533  | 3.141663  |
| H  | 5.556485  | -0.456823 | 3.479384  |
| H  | 6.578799  | 0.999349  | 3.662181  |
| H  | 4.800078  | 1.169751  | 3.474351  |
| C  | 7.110414  | -0.136124 | 1.174611  |
| H  | 8.024847  | 0.260115  | 1.663414  |
| H  | 7.018010  | -1.204179 | 1.459106  |
| H  | 7.258843  | -0.089033 | 0.075915  |
| C  | 3.682400  | -3.970342 | 1.886585  |
| H  | 4.721956  | -4.023902 | 1.502200  |
| H  | 3.695652  | -3.433892 | 2.858254  |
| H  | 3.352524  | -5.009826 | 2.087542  |
| C  | 2.749157  | -4.142229 | -0.436262 |
| H  | 2.076511  | -3.712489 | -1.203674 |
| H  | 3.775623  | -4.178168 | -0.855811 |
| H  | 2.422958  | -5.184280 | -0.236561 |
| C  | 1.294726  | -3.319158 | 1.484688  |
| H  | 1.266843  | -2.728047 | 2.424854  |
| H  | 0.547995  | -2.903393 | 0.782269  |
| H  | 0.985317  | -4.356372 | 1.729781  |
| C  | -4.612676 | -0.898584 | -2.249234 |
| H  | -3.571629 | -0.910162 | -2.626227 |
| H  | -4.833149 | -1.891071 | -1.805047 |
| H  | -5.293790 | -0.757018 | -3.114160 |
| C  | -4.562310 | 1.610058  | -1.879201 |
| H  | -4.729710 | 2.437085  | -1.158356 |
| H  | -3.521520 | 1.683203  | -2.253076 |
| H  | -5.249915 | 1.759535  | -2.737670 |
| C  | -6.302279 | 0.195104  | -0.752673 |
| H  | -6.570285 | -0.779139 | -0.293925 |
| H  | -6.531570 | 1.000160  | -0.024096 |
| H  | -6.968226 | 0.340884  | -1.627392 |
| C  | -4.727781 | -1.863452 | 3.798048  |
| H  | -5.157621 | -2.082099 | 4.797867  |
| H  | -5.561210 | -1.873517 | 3.066169  |
| H  | -4.033539 | -2.687628 | 3.532729  |
| C  | -4.985154 | 0.630318  | 4.180748  |
| H  | -5.834389 | 0.685738  | 3.469431  |
| H  | -5.410330 | 0.456836  | 5.191240  |
| H  | -4.480872 | 1.619081  | 4.185111  |
| C  | -2.892291 | -0.551925 | 4.900493  |
| H  | -2.159361 | -1.364029 | 4.711539  |
| H  | -2.340328 | 0.408264  | 4.980061  |
| H  | -3.351435 | -0.748660 | 5.890440  |
| C  | -0.934074 | -3.323149 | -1.974340 |
| C  | -0.655688 | -2.055098 | -2.811928 |
| H  | 0.049747  | -3.661786 | -1.582364 |
| H  | 0.186757  | -2.258813 | -3.514633 |
| H  | -1.552871 | -1.757623 | -3.405296 |
| C  | -1.510512 | -4.440866 | -2.864165 |
| H  | -0.848601 | -4.656303 | -3.728535 |
| H  | -1.636814 | -5.382862 | -2.288873 |
| H  | -2.507211 | -4.153275 | -3.263262 |
| C  | -1.846117 | -3.067814 | -0.762166 |

|  |   |           |           |           |
|--|---|-----------|-----------|-----------|
|  | H | -1.397000 | -2.364682 | -0.028679 |
|  | H | -2.042524 | -4.010551 | -0.211452 |
|  | C | -0.624224 | 2.815652  | 0.868065  |
|  | C | 1.300829  | 3.454600  | -1.052395 |
|  | C | 0.585976  | 4.496875  | -0.430604 |
|  | C | -0.392404 | 4.168617  | 0.553566  |
|  | H | -1.395375 | 2.551374  | 1.607429  |
|  | H | 2.064435  | 3.693779  | -1.811275 |
|  | C | -1.173911 | 5.256080  | 1.248758  |
|  | H | -1.736764 | 5.879055  | 0.521025  |
|  | H | -1.900157 | 4.841118  | 1.973637  |
|  | H | -0.501133 | 5.948763  | 1.798558  |
|  | C | 0.855492  | 5.935322  | -0.794639 |
|  | H | -0.062497 | 6.435108  | -1.171177 |
|  | H | 1.185724  | 6.518438  | 0.091511  |
|  | H | 1.637745  | 6.028031  | -1.572646 |
|  | C | -0.326813 | 1.223467  | -3.783644 |
|  | C | 0.515658  | 0.367927  | -4.427479 |
|  | H | 0.025484  | 2.168740  | -3.332454 |
|  | H | -1.416748 | 1.062736  | -3.799932 |
|  | H | 0.070618  | -0.514925 | -4.919450 |
|  | C | 1.996809  | 0.522061  | -4.594393 |
|  | H | 2.261887  | 0.450591  | -5.670879 |
|  | H | 2.374425  | 1.496725  | -4.221043 |
|  | H | 2.545344  | -0.305623 | -4.091866 |

**6-7 (isomer)**

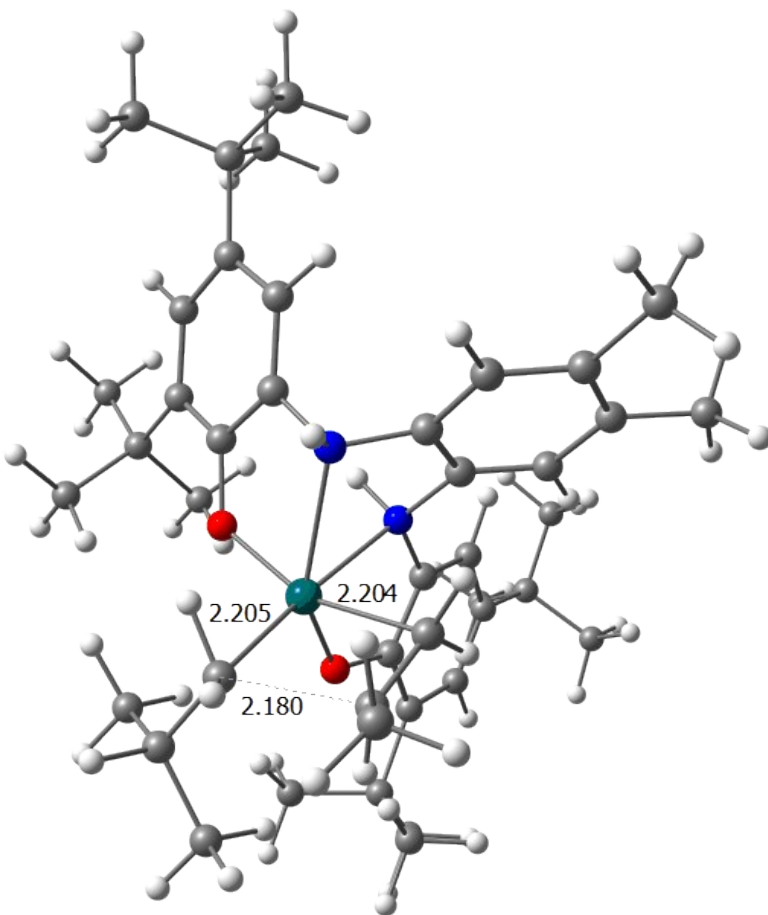

Zero-point correction= 0.964250 (Hartree/Particle)  
 Thermal correction to Energy= 1.038579  
 Thermal correction to Enthalpy= 1.039697  
 Thermal correction to Gibbs Free Energy= 0.852074  
 Sum of electronic and zero-point Energies= -1993.791399  
 Sum of electronic and thermal Energies= -1993.717071  
 Sum of electronic and thermal Enthalpies= -1993.715952  
 Sum of electronic and thermal Free Energies= -1993.903576

Solvent: -1994.4080054

113

PhTitBuCH3+propTS2+ SCF Done: -1994.75564940 A.U.

|    |           |           |           |
|----|-----------|-----------|-----------|
| Ti | -0.275268 | 1.409144  | 1.127807  |
| N  | -0.153778 | -0.712112 | 0.179778  |
| O  | -1.908182 | 1.197401  | 0.345464  |
| C  | -2.376723 | 0.080074  | -0.284741 |
| C  | -1.453537 | -0.979655 | -0.421354 |
| C  | -1.768011 | -2.129827 | -1.158766 |
| H  | -0.997364 | -2.898697 | -1.301862 |
| C  | -3.054042 | -2.270234 | -1.715228 |
| C  | -3.981870 | -1.222731 | -1.497556 |
| H  | -4.992090 | -1.341460 | -1.910266 |
| C  | -3.696901 | -0.034884 | -0.797142 |
| C  | 0.442432  | -1.618839 | 1.146630  |
| C  | -3.477308 | -3.509699 | -2.528780 |
| N  | 1.791264  | 0.345915  | 1.631984  |
| O  | 0.873243  | 1.890953  | -0.261630 |
| C  | 2.063060  | 1.323686  | -0.569874 |
| C  | 2.640826  | 0.526139  | 0.439220  |
| C  | 3.875675  | -0.111599 | 0.269062  |
| H  | 4.268700  | -0.738686 | 1.080981  |
| C  | 4.567795  | 0.041453  | -0.947378 |
| C  | 3.944431  | 0.804324  | -1.967673 |
| H  | 4.465952  | 0.887324  | -2.930355 |
| C  | 2.697894  | 1.445524  | -1.838559 |
| C  | 1.496740  | -1.055980 | 1.894315  |
| C  | 5.939740  | -0.610817 | -1.211010 |
| C  | -4.746478 | 1.066232  | -0.557284 |
| C  | 2.008827  | 2.190462  | -2.996221 |
| H  | 0.541415  | -0.540526 | -0.572974 |
| H  | 2.250388  | 0.756616  | 2.460483  |
| H  | -1.434521 | 3.515982  | -0.401528 |
| C  | 6.454123  | -1.390750 | 0.016744  |
| H  | 6.583207  | -0.731937 | 0.900999  |
| H  | 5.775544  | -2.224262 | 0.295197  |
| H  | 7.444388  | -1.836057 | -0.208278 |
| C  | 5.813927  | -1.596132 | -2.402181 |
| H  | 5.493389  | -1.085151 | -3.332987 |
| H  | 6.792161  | -2.078479 | -2.608095 |
| H  | 5.075867  | -2.395258 | -2.181560 |
| C  | 6.968909  | 0.96418   | -1.555951 |
| H  | 7.966124  | 0.048427  | -1.747974 |
| H  | 6.679959  | 1.065508  | -2.463106 |
| H  | 7.070696  | 1.219053  | -0.719947 |
| C  | 2.838085  | 2.127718  | -4.295899 |
| H  | 3.828629  | 2.614938  | -4.182112 |
| H  | 2.998074  | 1.084735  | -4.639869 |
| H  | 2.299997  | 2.663556  | -5.103882 |
| C  | 1.814063  | 3.678624  | -2.611666 |
| H  | 1.189464  | 3.779414  | -1.704348 |
| H  | 2.791233  | 4.168171  | -2.420670 |
| H  | 1.311335  | 4.225675  | -3.436362 |
| C  | 0.630769  | 1.524174  | -3.267065 |
| H  | 0.757281  | 0.454015  | -3.535343 |
| H  | -0.040485 | 1.589447  | -2.387726 |
| H  | 0.123952  | 2.026917  | -4.116810 |
| C  | -4.269243 | 2.396206  | -1.194675 |
| H  | -3.311889 | 2.740371  | -0.761556 |
| H  | -4.130329 | 2.280920  | -2.289403 |
| H  | -5.024621 | 3.192052  | -1.027170 |
| C  | -4.935621 | 1.236011  | 0.973829  |
| H  | -5.328596 | 0.303317  | 1.428351  |
| H  | -3.979235 | 1.483908  | 1.474625  |
| H  | -5.655717 | 2.053332  | -1.186047 |
| C  | -6.115428 | 0.704817  | -1.171851 |
| H  | -6.060195 | 0.594133  | -2.274570 |
| H  | -6.533020 | -0.230805 | -0.745595 |
| H  | -6.841059 | 1.515986  | -0.958953 |
| C  | -3.880053 | -3.065128 | -3.958806 |
| H  | -4.187583 | -3.944027 | -4.563003 |
| H  | -4.730854 | -2.353819 | -3.947851 |
| H  | -3.031510 | -2.570609 | -4.475369 |
| C  | -4.686656 | -4.185638 | -1.832100 |
| H  | -5.562576 | -3.508506 | -1.767979 |
| H  | -5.003171 | -5.085520 | -2.399483 |
| H  | -4.426568 | -4.502062 | -0.800554 |
| C  | -2.338103 | -4.544522 | -2.640416 |
| H  | -1.449762 | -4.131180 | -3.162282 |
| H  | -2.018361 | -4.919227 | -1.645205 |
| H  | -2.682988 | -5.421452 | -3.224999 |
| C  | -1.183837 | 4.339736  | 1.644524  |
| C  | -0.354963 | 3.235261  | 2.361748  |
| H  | -0.755204 | 5.289657  | 2.043283  |
| H  | 0.679151  | 3.150261  | 1.910235  |
| H  | -0.133963 | 3.562472  | 3.387550  |
| C  | -2.667439 | 4.309939  | 2.043306  |
| H  | -2.805763 | 4.310107  | 3.144611  |
| H  | -3.190567 | 5.201575  | 1.642529  |
| H  | -3.172237 | 3.415965  | 1.623791  |
| C  | -1.010750 | 4.400925  | 0.115654  |
| H  | 0.057089  | 4.475913  | -0.168686 |

|  |   |           |           |           |
|--|---|-----------|-----------|-----------|
|  | H | -1.534310 | 5.290489  | -0.288500 |
|  | C | 0.003799  | -2.911690 | 1.448945  |
|  | C | 2.130747  | -1.800945 | 2.893114  |
|  | C | 1.714494  | -3.117402 | 3.191406  |
|  | C | 0.626092  | -3.673198 | 2.465124  |
|  | H | -0.853578 | -3.336441 | 0.908743  |
|  | H | 2.948890  | -1.343230 | 3.473774  |
|  | C | 0.135301  | -5.066785 | 2.774691  |
|  | H | -0.183098 | -5.158717 | 3.835276  |
|  | H | -0.722523 | -5.354756 | 2.136783  |
|  | H | 0.938439  | -5.819935 | 2.624224  |
|  | C | 2.404626  | -3.911691 | 4.273252  |
|  | H | 1.693798  | -4.213942 | 5.071933  |
|  | H | 2.836904  | -4.852053 | 3.868832  |
|  | H | 3.225407  | -3.339335 | 4.747304  |
|  | C | -0.965567 | 0.328173  | 2.920217  |
|  | C | -1.333787 | 1.608371  | 3.433357  |
|  | H | -0.224994 | -0.247871 | 3.499822  |
|  | H | -1.751457 | -0.287964 | 2.447204  |
|  | H | -2.331276 | 1.987185  | 3.156321  |
|  | C | -0.882220 | 1.983855  | 4.829437  |
|  | H | -1.102265 | 3.036165  | 5.096136  |
|  | H | -1.433629 | 1.334186  | 5.543094  |
|  | H | 0.199992  | 1.789723  | 4.979944  |

## 7 (isomer)

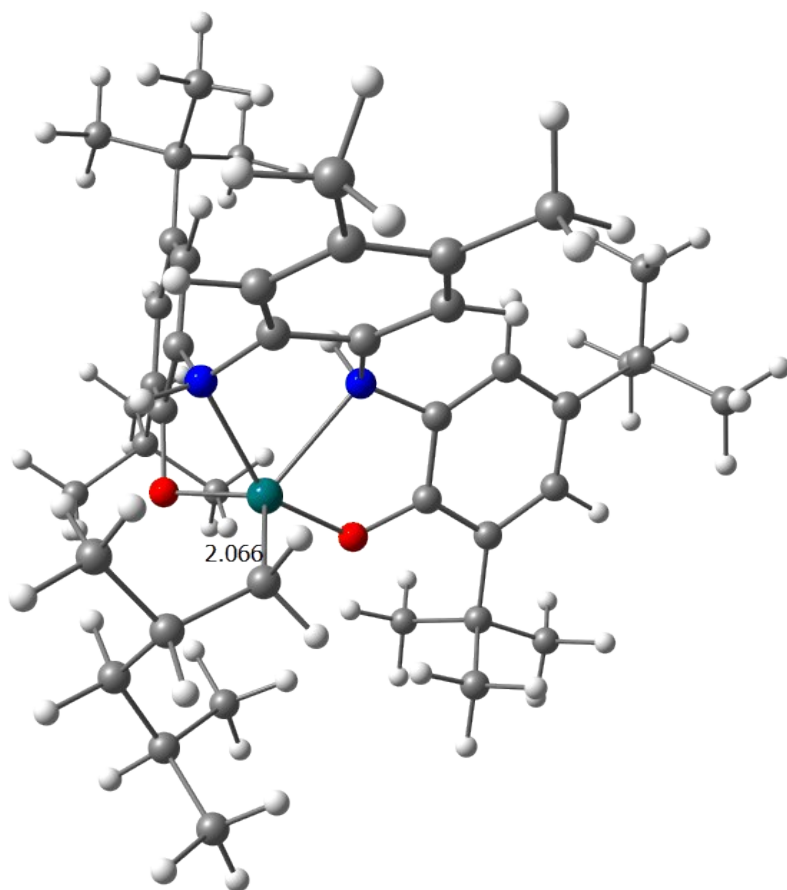

Zero-point correction= 0.966116 (Hartree/Particle)  
 Thermal correction to Energy= 1.040743  
 Thermal correction to Enthalpy= 1.041862  
 Thermal correction to Gibbs Free Energy= 0.851610  
 Sum of electronic and zero-point Energies= -1993.834359  
 Sum of electronic and thermal Energies= -1993.759732  
 Sum of electronic and thermal Enthalpies= -1993.758614  
 Sum of electronic and thermal Free Energies= -1993.948865

Solvent: -1994.4614209

113

PhTitBuCH3+propTS2+POST SCF Done: -1994.80047521 A.U.

|    |           |           |           |
|----|-----------|-----------|-----------|
| Ti | -0.577354 | 1.217893  | -0.536789 |
| N  | 0.383252  | -0.834600 | -0.471024 |
| O  | 1.022001  | 1.532083  | 0.293699  |
| C  | 2.037360  | 0.636625  | 0.444724  |
| C  | 1.746768  | -0.681535 | 0.038992  |
| C  | 2.653677  | -1.731124 | 0.234648  |
| H  | 2.361419  | -2.755676 | -0.031581 |
| C  | 3.918335  | -1.450226 | 0.790333  |
| C  | 4.202802  | -0.106564 | 1.140645  |
| H  | 5.191480  | 0.110557  | 1.565693  |
| C  | 3.300876  | 0.966277  | 1.000054  |
| C  | 0.102872  | -1.388869 | -1.792415 |
| C  | 4.979630  | -2.543085 | 1.029188  |
| N  | -1.980065 | -0.197234 | -1.455093 |
| O  | -2.080310 | 1.652183  | 0.450247  |
| C  | -2.451868 | 0.391925  | 0.854748  |
| C  | -2.457006 | -0.627814 | -0.139292 |
| C  | -2.724059 | -1.968735 | 0.168688  |
| H  | -2.678391 | -2.711304 | -0.640130 |
| C  | -3.036663 | -2.321511 | 1.494773  |
| C  | -3.038650 | -1.289436 | 2.470445  |
| H  | -3.271031 | -1.570062 | 3.505935  |
| C  | -2.736046 | 0.059458  | 2.212179  |
| C  | -1.194861 | -1.098806 | -2.267874 |
| C  | -3.362114 | -3.768266 | 1.910520  |
| C  | 3.635691  | 2.415498  | 1.398911  |
| C  | -2.649008 | 1.125109  | 3.320473  |
| H  | -0.174802 | -1.369426 | 0.223822  |
| H  | -2.701286 | 0.299270  | -2.003394 |
| H  | 0.542863  | 3.938517  | -0.270883 |
| C  | -3.269971 | -4.745426 | 0.720387  |
| H  | -3.992818 | -4.492206 | -0.082881 |
| H  | -2.250368 | -4.770398 | 0.281194  |
| H  | -3.505834 | -5.773786 | 1.060685  |
| C  | -2.353906 | -4.221732 | 2.998780  |
| H  | -2.407465 | -3.591297 | 3.909465  |
| H  | -2.567390 | -5.266359 | 3.306352  |
| H  | -1.311940 | -4.182955 | 2.617486  |
| C  | -4.804182 | -3.814144 | 2.479851  |
| H  | -5.061535 | -4.849258 | 2.786216  |
| H  | -4.919992 | -3.164075 | 3.370674  |
| H  | -5.543326 | -3.485901 | 1.720287  |
| C  | -3.040536 | 0.548516  | 4.697719  |
| H  | -4.081747 | 0.164480  | 4.706662  |
| H  | -2.361132 | -0.267249 | 5.021573  |
| H  | -2.978165 | 1.348557  | 5.462504  |
| C  | -3.604298 | 2.303032  | 2.995443  |
| H  | -3.341735 | 2.795683  | 2.039933  |
| H  | -4.655191 | 1.952464  | 2.932053  |
| H  | -3.548065 | 3.063947  | 3.801129  |
| C  | -1.181030 | 1.630211  | 3.405117  |
| H  | -0.483983 | 0.792643  | 3.617249  |
| H  | -0.853874 | 2.122712  | 2.469534  |
| H  | -1.082670 | 2.370327  | 4.225644  |
| C  | 2.620695  | 2.910860  | 2.464154  |
| H  | 1.584082  | 2.914256  | 2.076339  |
| H  | 2.652590  | 2.268735  | 3.368627  |
| H  | 2.873700  | 3.946685  | 2.771987  |
| C  | 3.556616  | 3.309306  | 0.132511  |
| H  | 4.296712  | 2.984898  | -0.627813 |
| H  | 2.549673  | 3.275686  | -0.327977 |
| H  | 3.773451  | 4.365438  | 0.395641  |
| C  | 5.055544  | 2.533766  | 1.990614  |
| H  | 5.171098  | 1.930793  | 2.915134  |
| H  | 5.837751  | 2.221682  | 1.267888  |
| H  | 5.257808  | 3.590708  | 2.258020  |
| C  | 5.316602  | -2.601173 | 2.541990  |
| H  | 6.072697  | -3.389739 | 2.738315  |
| H  | 5.733291  | -1.642123 | 2.911653  |
| H  | 4.412839  | -2.832803 | 3.142996  |
| C  | 6.257730  | -2.194295 | 0.222943  |
| H  | 6.691417  | -1.221927 | 0.532683  |
| H  | 7.035471  | -2.970451 | 0.379872  |
| H  | 6.040483  | -2.138358 | -0.863978 |
| C  | 4.486557  | -3.935942 | 0.584430  |
| H  | 3.586965  | -4.259259 | 1.149154  |
| H  | 4.251150  | -3.967233 | -0.500432 |
| H  | 5.277208  | -4.691067 | 0.768975  |
| C  | -1.060045 | 5.219398  | -1.112417 |
| C  | -2.053563 | 4.228439  | -1.772863 |
| H  | -1.704360 | 6.015070  | -0.673689 |
| H  | -2.595979 | 3.680898  | -0.968128 |
| H  | -2.827762 | 4.827402  | -2.301348 |
| C  | -0.129359 | 5.899116  | -2.130301 |
| H  | -0.701487 | 6.357405  | -2.964013 |
| H  | 0.468383  | 6.701757  | -1.651036 |
| H  | 0.591235  | 5.178000  | -2.574151 |
| C  | -0.266726 | 4.617590  | 0.063739  |

|  |   |           |           |           |
|--|---|-----------|-----------|-----------|
|  | H | -0.925132 | 4.054645  | 0.760197  |
|  | H | 0.233665  | 5.410618  | 0.657268  |
|  | C | 0.993219  | -2.102441 | -2.600370 |
|  | C | -1.601093 | -1.551227 | -3.527113 |
|  | C | -0.715616 | -2.281796 | -4.349855 |
|  | C | 0.602746  | -2.549874 | -3.883032 |
|  | H | 2.016002  | -2.293524 | -2.246384 |
|  | H | -2.614342 | -1.311289 | -3.887246 |
|  | C | 1.579971  | -3.304925 | -4.750096 |
|  | H | 1.736448  | -2.791746 | -5.722904 |
|  | H | 2.567005  | -3.414989 | -4.261245 |
|  | H | 1.203723  | -4.322341 | -4.991094 |
|  | C | -1.159146 | -2.757633 | -5.710840 |
|  | H | -0.514278 | -2.341261 | -6.514142 |
|  | H | -1.086186 | -3.863111 | -5.793972 |
|  | H | -2.205138 | -2.469075 | -5.929821 |
|  | C | -0.392366 | 2.274940  | -2.301853 |
|  | C | -1.526817 | 3.196012  | -2.802839 |
|  | H | -0.154551 | 1.482784  | -3.055909 |
|  | H | 0.549087  | 2.847343  | -2.142711 |
|  | H | -1.100512 | 3.771406  | -3.658438 |
|  | C | -2.718738 | 2.395795  | -3.362783 |
|  | H | -3.413656 | 3.048770  | -3.928710 |
|  | H | -2.391228 | 1.582684  | -4.045814 |
|  | H | -3.326525 | 1.956707  | -2.536729 |

## 2 (ethylene)

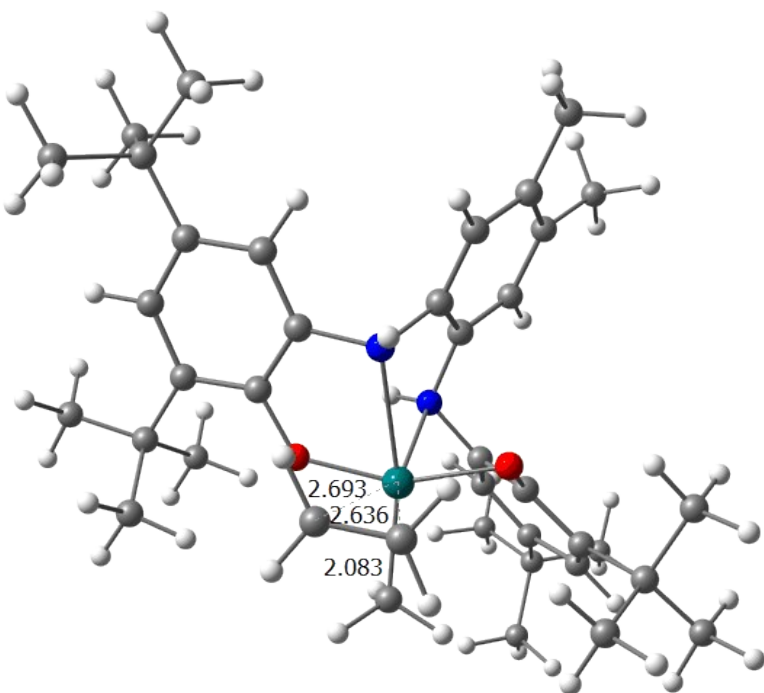

Zero-point correction= 0.852048 (Hartree/Particle)  
 Thermal correction to Energy= 0.921051  
 Thermal correction to Enthalpy= 0.922169  
 Thermal correction to Gibbs Free Energy= 0.745212  
 Sum of electronic and zero-point Energies= -1836.757762  
 Sum of electronic and thermal Energies= -1836.688759  
 Sum of electronic and thermal Enthalpies= -1836.687641  
 Sum of electronic and thermal Free Energies= -1836.864598

Solvent: -1837.2964238

| 101                                                  |           |                     |
|------------------------------------------------------|-----------|---------------------|
| PhTitBuCH3+etileTS+PRE SCF Done: -1837.60981021 A.U. |           |                     |
| Ti                                                   | 0.453713  | -0.763007 1.107915  |
| N                                                    | 0.509856  | 0.222043 -0.806346  |
| O                                                    | 1.586934  | 0.749629 1.513093   |
| C                                                    | 2.481851  | 0.363820 0.576831   |
| C                                                    | 1.931268  | -0.017583 -0.690736 |
| C                                                    | 2.699088  | -0.640204 -1.693237 |
| H                                                    | 2.210014  | -0.933444 -2.632948 |
| C                                                    | 4.063773  | -0.857209 -1.470098 |
| C                                                    | 4.617894  | -0.383415 -0.244025 |
| H                                                    | 5.697177  | -0.519444 -0.095191 |
| C                                                    | 3.893491  | 0.226501 0.787394   |
| C                                                    | 0.064714  | 1.615083 -0.767027  |
| C                                                    | 4.973790  | -1.562842 -2.491649 |
| N                                                    | -1.328089 | 0.932453 1.123423   |
| O                                                    | -1.077704 | -1.654356 0.588061  |
| C                                                    | -2.306390 | -1.155575 0.325051  |
| C                                                    | -2.500064 | 0.217743 0.600820   |
| C                                                    | -3.733578 | 0.838350 0.366442   |
| H                                                    | -3.836510 | 1.911252 0.579212   |
| C                                                    | -4.810577 | 0.087918 -0.145127  |
| C                                                    | -4.589028 | -1.287471 -0.408252 |
| H                                                    | -5.427975 | -1.871751 -0.808552 |
| C                                                    | -3.367885 | -1.951370 -0.191177 |
| C                                                    | -0.840046 | 1.977965 0.241771   |
| C                                                    | -6.194157 | 0.705470 -0.429301  |
| C                                                    | 4.551747  | 0.748841 2.076189   |
| C                                                    | -3.157005 | -3.447537 -0.493064 |
| H                                                    | 0.083618  | -0.304968 -1.583598 |
| H                                                    | -1.556211 | 1.352240 2.035757   |
| H                                                    | 1.739937  | -2.867759 0.434480  |
| C                                                    | -6.245103 | 2.204136 -0.065191  |
| H                                                    | -6.050401 | 2.375209 1.014305   |
| H                                                    | -5.515878 | 2.799706 -0.653554  |
| H                                                    | -7.253282 | 2.609678 -0.285385  |
| C                                                    | -6.512033 | 0.555630 -1.939952  |
| H                                                    | -6.538965 | -0.507242 -2.255438 |
| H                                                    | -7.504482 | 0.996720 -2.169273  |
| H                                                    | -5.752222 | 1.075354 -2.559879  |
| C                                                    | -7.266818 | -0.040234 0.406473  |
| H                                                    | -8.270151 | 0.397042 0.222099   |
| H                                                    | -7.322044 | -1.117345 0.148033  |
| H                                                    | -7.051453 | 0.038308 1.492243   |
| C                                                    | -4.443928 | -4.112105 -1.025373 |
| H                                                    | -5.273469 | -4.058917 -0.290281 |
| H                                                    | -4.788081 | -3.654701 -1.976058 |
| H                                                    | -4.250413 | -5.185062 -1.227391 |
| C                                                    | -2.732524 | -4.183318 0.806534  |
| H                                                    | -1.768657 | -3.800945 1.195466  |
| H                                                    | -3.503858 | -4.066153 1.595897  |
| H                                                    | -2.612455 | -5.268366 0.606480  |
| C                                                    | -2.049790 | -3.598262 -1.570965 |
| H                                                    | -2.340480 | -3.080471 -2.508948 |
| H                                                    | -1.083420 | -3.184405 -1.220266 |
| H                                                    | -1.892588 | -4.670909 -1.808916 |
| C                                                    | 4.019309  | -0.047084 3.295452  |
| H                                                    | 2.923723  | 0.061747 3.392921   |
| H                                                    | 4.264560  | -1.125784 3.206820  |
| H                                                    | 4.487532  | 0.331272 4.227626   |
| C                                                    | 4.203252  | 2.252986 2.237228   |
| H                                                    | 4.582220  | 2.839175 1.374538   |
| H                                                    | 3.110387  | 2.413454 2.316543   |
| H                                                    | 4.678608  | 2.653807 3.156457   |
| C                                                    | 6.087482  | 0.604873 2.035142   |
| H                                                    | 6.408249  | -0.455474 1.965788  |
| H                                                    | 6.535782  | 1.164702 1.188200   |
| H                                                    | 6.520954  | 1.016271 2.968975   |
| C                                                    | 5.550231  | -2.844992 -1.834874 |
| H                                                    | 6.214610  | -3.374791 -2.548653 |
| H                                                    | 6.148510  | -2.617173 -0.929188 |
| H                                                    | 4.737492  | -3.540545 -1.539191 |
| C                                                    | 6.131215  | -0.612007 -2.893382 |
| H                                                    | 6.765276  | -0.332101 -2.027596 |
| H                                                    | 6.788873  | -1.106877 -3.637455 |
| H                                                    | 5.741001  | 0.322488 -3.346942  |
| C                                                    | 4.204673  | -1.966524 -3.766170 |
| H                                                    | 3.376245  | -2.671920 -3.545796 |
| H                                                    | 3.786448  | -1.084809 -4.295571 |
| H                                                    | 4.889226  | -2.477701 -4.472481 |
| C                                                    | 0.221032  | -0.616470 3.729445  |
| C                                                    | -0.880521 | -1.326114 3.378603  |
| H                                                    | 1.168174  | -1.119947 3.982737  |
| H                                                    | -0.862660 | -2.425848 3.315778  |
| H                                                    | -1.855970 | -0.850360 3.182951  |
| H                                                    | 0.205951  | 0.480611 3.838812   |
| C                                                    | 1.610755  | -2.457435 1.466192  |
| H                                                    | 1.103263  | -3.229232 2.082876  |
| H                                                    | 2.618443  | -2.242421 1.878684  |
| C                                                    | 0.579381  | 2.575872 -1.644969  |
| C                                                    | -1.217865 | 3.323928 0.361589   |



|  |   |           |          |           |
|--|---|-----------|----------|-----------|
|  | C | -0.714209 | 4.308894 | -0.513132 |
|  | C | 0.195343  | 3.927793 | -1.542747 |
|  | H | 1.311341  | 2.265797 | -2.408084 |
|  | H | -1.916476 | 3.617713 | 1.162081  |
|  | C | 0.751726  | 4.957198 | -2.495349 |
|  | H | 1.305026  | 5.753505 | -1.952807 |
|  | H | 1.442922  | 4.505606 | -3.232874 |
|  | H | -0.059339 | 5.467507 | -3.057681 |
|  | C | -1.132218 | 5.750421 | -0.360646 |
|  | H | -0.252981 | 6.409963 | -0.198744 |
|  | H | -1.636495 | 6.122760 | -1.278134 |
|  | H | -1.826160 | 5.893445 | 0.489951  |

## 2-3 (ethylene)

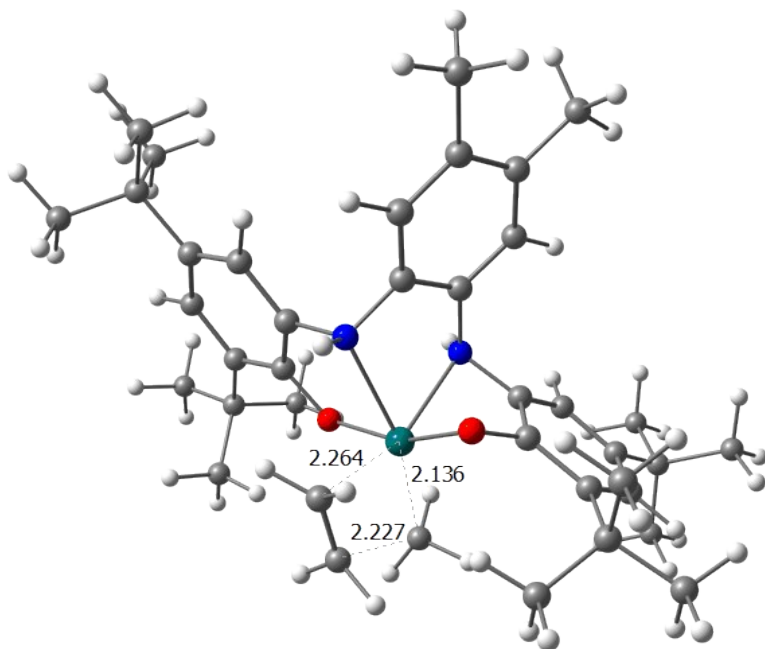

Zero-point correction= 0.854124 (Hartree/Particle)  
 Thermal correction to Energy= 0.920930  
 Thermal correction to Enthalpy= 0.922048  
 Thermal correction to Gibbs Free Energy= 0.750676  
 Sum of electronic and zero-point Energies= -1836.753613  
 Sum of electronic and thermal Energies= -1836.686806  
 Sum of electronic and thermal Enthalpies= -1836.685688  
 Sum of electronic and thermal Free Energies= -1836.857060

Solvent: -1837.2926268

101

PhTitBuCH3+etileTS+ SCF Done: -1837.60773638 A.U.

|    |           |           |           |
|----|-----------|-----------|-----------|
| Ti | -0.386970 | -0.916557 | -0.891607 |
| N  | -0.618548 | 0.331600  | 0.892862  |
| O  | -1.515885 | 0.502527  | -1.569630 |
| C  | -2.479169 | 0.280060  | -0.646757 |
| C  | -2.043177 | 0.133614  | 0.706895  |
| C  | -2.910587 | -0.268982 | 1.738353  |
| H  | -2.509274 | -0.384499 | 2.755182  |
| C  | -4.261526 | -0.505125 | 1.447295  |
| C  | -4.696508 | -0.291125 | 0.107629  |
| H  | -5.761690 | -0.449406 | -0.106204 |
| C  | -3.867288 | 0.095545  | -0.954174 |
| C  | -0.123079 | 1.694828  | 0.716776  |
| C  | -5.275673 | -0.966616 | 2.510550  |
| N  | 1.262912  | 0.749838  | -1.061919 |
| O  | 1.124425  | -1.729071 | -0.210652 |
| C  | 2.361472  | -1.190231 | -0.094899 |
| C  | 2.496951  | 0.142516  | -0.539627 |
| C  | 3.723264  | 0.814626  | -0.468310 |
| H  | 3.782949  | 1.856401  | -0.809711 |
| C  | 4.854027  | 0.150518  | 0.046062  |
| C  | 4.692665  | -1.191035 | 0.474686  |
| H  | 5.575025  | -1.710222 | 0.871373  |
| C  | 3.478784  | -1.900867 | 0.424137  |
| C  | 0.802830  | 1.910582  | -0.312297 |
| C  | 6.235830  | 0.826064  | 0.153347  |
| C  | -4.390991 | 0.333295  | -2.382354 |
| C  | 3.336836  | -3.364063 | 0.886188  |
| H  | -0.284493 | -0.087382 | 1.773276  |
| H  | 1.406938  | 1.033670  | -2.041895 |
| H  | -1.317176 | -2.497374 | 0.088592  |
| C  | 6.208560  | 2.282533  | -0.354927 |
| H  | 5.925005  | 2.342651  | -1.426738 |
| H  | 5.507140  | 2.913234  | 0.230741  |
| H  | 7.216397  | 2.734545  | -0.257376 |
| C  | 6.681747  | 0.833119  | 1.638835  |
| H  | 6.766846  | -0.192525 | 2.052380  |
| H  | 7.675992  | 1.316050  | 1.740430  |
| H  | 5.959982  | 1.394314  | 2.267975  |
| C  | 7.259629  | 0.028132  | -0.695308 |
| H  | 8.262490  | 0.499730  | -0.632262 |
| H  | 7.362549  | -1.019661 | -0.346487 |
| H  | 6.957828  | 0.002341  | -1.762947 |
| C  | 4.673648  | -3.936708 | 1.402188  |
| H  | 5.457441  | -3.936567 | 0.616726  |
| H  | 5.056009  | -3.374125 | 2.278856  |
| H  | 4.528185  | -4.988243 | 1.722849  |
| C  | 2.865736  | -4.232065 | -0.311847 |
| H  | 1.882109  | -3.894535 | -0.694300 |
| H  | 3.599074  | -4.186016 | -1.143477 |
| H  | 2.768749  | -5.293051 | -0.000342 |
| C  | 2.298774  | -3.440770 | 2.037326  |
| H  | 2.622960  | -2.824214 | 2.901475  |
| H  | 1.301168  | -3.088628 | 1.707911  |
| C  | 2.193354  | -4.488782 | 2.387458  |
| H  | -3.726930 | -0.673562 | -3.358655 |
| H  | -2.627786 | -0.549093 | -3.374460 |
| H  | -3.969610 | -1.720065 | -3.076618 |
| H  | -4.104607 | -0.507598 | -4.388644 |
| C  | -4.041837 | 1.784770  | -2.806475 |
| H  | -4.519837 | 2.518195  | -2.124650 |
| H  | -2.948680 | 1.960282  | -2.798371 |
| H  | -4.416758 | 1.979077  | -3.832857 |
| C  | -5.920730 | 0.153145  | -2.471093 |
| H  | -6.237705 | -0.879856 | -2.217140 |
| H  | -6.461698 | 0.859857  | -1.808399 |
| H  | -6.255682 | 0.353018  | -3.508995 |
| C  | -5.863915 | -2.335774 | 2.078632  |
| H  | -6.602803 | -2.688493 | 2.827813  |
| H  | -6.384435 | -2.276509 | 1.101026  |
| H  | -5.066216 | -3.103082 | 1.995312  |
| C  | -6.414518 | 0.080971  | 2.618429  |
| H  | -6.962939 | 0.203077  | 1.662265  |
| H  | -7.151686 | -0.235032 | 3.385308  |
| H  | -6.016286 | 1.074127  | 2.912266  |
| C  | -4.624459 | -1.128798 | 3.899341  |
| H  | -3.815409 | -1.889090 | 3.892941  |
| H  | -4.207164 | -0.171906 | 4.277057  |
| H  | -5.383965 | -1.466296 | 4.633058  |
| C  | -0.384075 | -2.428686 | -2.904685 |
| C  | 0.340624  | -1.235766 | -3.011198 |
| H  | 0.162826  | -3.365243 | -2.719581 |
| H  | 1.439602  | -1.274875 | -2.916366 |
| H  | -0.098012 | -0.378410 | -3.548838 |
| H  | -1.363594 | -2.531921 | -3.396472 |
| C  | -1.511401 | -2.728975 | -1.007166 |
| H  | -1.304466 | -3.807132 | -1.110154 |
| H  | -2.571954 | -2.502521 | -1.233482 |
| C  | -0.598604 | 2.766142  | 1.483287  |
| C  | 1.235847  | 3.218134  | -0.579832 |

|  |   |           |          |           |
|--|---|-----------|----------|-----------|
|  | C | 0.773601  | 4.310685 | 0.181697  |
|  | C | -0.153641 | 4.080625 | 1.240820  |
|  | H | -1.346922 | 2.572568 | 2.268520  |
|  | H | 1.943703  | 3.395343 | -1.405582 |
|  | C | -0.662610 | 5.230752 | 2.074269  |
|  | H | -1.175120 | 5.989951 | 1.445444  |
|  | H | -1.376279 | 4.894713 | 2.851031  |
|  | H | 0.171762  | 5.759168 | 2.583344  |
|  | C | 1.251501  | 5.709369 | -0.121305 |
|  | H | 0.402766  | 6.378114 | -0.379863 |
|  | H | 1.749243  | 6.164246 | 0.761761  |
|  | H | 1.969004  | 5.728970 | -0.964122 |

### 3 (ethylene)

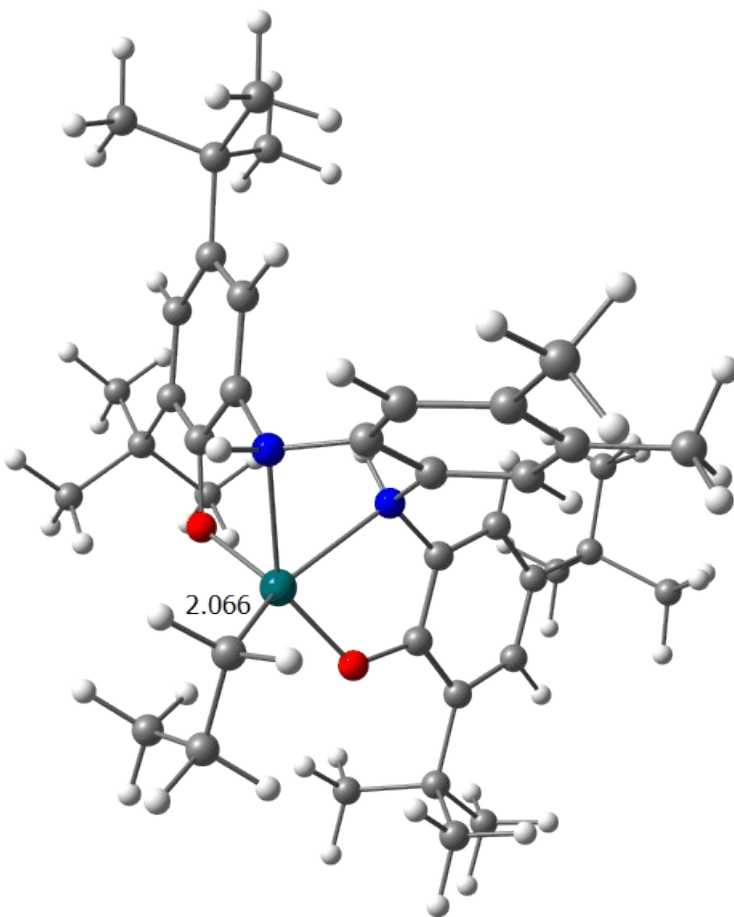

Zero-point correction= 0.855042 (Hartree/Particle)  
 Thermal correction to Energy= 0.921884  
 Thermal correction to Enthalpy= 0.923003  
 Thermal correction to Gibbs Free Energy= 0.750549  
 Sum of electronic and zero-point Energies= -1836.789322  
 Sum of electronic and thermal Energies= -1836.722480  
 Sum of electronic and thermal Enthalpies= -1836.721362  
 Sum of electronic and thermal Free Energies= -1836.893815

Solvent: -1837.3386826

101  
PhTitBuCH3+etileTS+POST SCF Done: -1837.64436421  
A.U.

|    |           |           |           |
|----|-----------|-----------|-----------|
| Ti | -0.077267 | -0.427907 | -1.929238 |
| N  | -0.257126 | 0.566518  | 0.079563  |
| O  | -1.858661 | -0.643162 | -1.523344 |
| C  | -2.403858 | -0.432295 | -0.288723 |
| C  | -1.559360 | 0.214168  | 0.633880  |
| C  | -1.951814 | 0.477659  | 1.951088  |
| H  | -1.246765 | 0.975286  | 2.631540  |
| C  | -3.243594 | 0.095521  | 2.366780  |
| C  | -4.079776 | -0.539631 | 1.415020  |
| H  | -5.085337 | -0.836859 | 1.740881  |
| C  | -3.712164 | -0.829878 | 0.085018  |
| C  | -0.030463 | 1.941806  | -0.340212 |
| C  | -3.762861 | 0.342230  | 3.797696  |
| N  | 1.716071  | 0.888577  | -1.633135 |
| O  | 1.172591  | -1.631114 | -1.309206 |
| C  | 2.247394  | -1.210047 | -0.572675 |
| C  | 2.565149  | 0.163534  | -0.677371 |
| C  | 3.592444  | 0.756770  | 0.063667  |
| H  | 3.778950  | 1.833866  | -0.051246 |
| C  | 4.351939  | -0.045883 | 0.938580  |
| C  | 4.020019  | -1.421980 | 1.024447  |
| H  | 4.605943  | -2.044769 | 1.713232  |
| C  | 2.980748  | -2.048748 | 0.306370  |
| C  | 1.052961  | 2.108791  | -1.230303 |
| C  | 5.507758  | 0.517068  | 1.790152  |
| C  | -4.644472 | -1.539731 | -0.914816 |
| C  | 2.614525  | -3.534974 | 0.476577  |
| H  | 0.518238  | 0.242444  | 0.688712  |
| H  | 2.212733  | 1.021755  | -2.527113 |
| H  | -0.667445 | -2.536405 | -2.897039 |
| C  | 5.717678  | 2.026533  | 1.550946  |
| H  | 5.975050  | 2.246154  | 0.493616  |
| H  | 4.820875  | 2.620527  | 1.826089  |
| H  | 6.557363  | 2.392788  | 2.175538  |
| C  | 5.186788  | 0.295808  | 3.291129  |
| H  | 5.071951  | -0.779334 | 3.538151  |
| H  | 6.006442  | 0.696502  | 3.923132  |
| H  | 4.247779  | 0.813537  | 3.578263  |
| C  | 6.817448  | -0.226695 | 1.420691  |
| H  | 7.665529  | 0.168751  | 2.017445  |
| H  | 6.748745  | -1.315055 | 1.622463  |
| H  | 7.061148  | -0.094626 | 0.346262  |
| C  | 3.566447  | -4.252561 | 1.456469  |
| H  | 4.618916  | -4.230153 | 1.105154  |
| H  | 3.527102  | -3.815292 | 2.475800  |
| H  | 3.270832  | -5.317527 | 1.544986  |
| C  | 2.701096  | -4.249200 | -0.897864 |
| H  | 2.002429  | -3.808001 | -1.635001 |
| H  | 3.729413  | -4.186223 | -1.310229 |
| H  | 2.445536  | -5.323183 | -0.783691 |
| C  | 1.170407  | -3.630927 | 1.040328  |
| H  | 1.101771  | -3.138526 | 2.032926  |
| H  | 0.431231  | -3.158550 | 0.363710  |
| H  | 0.882435  | -4.695040 | 1.168745  |
| C  | -3.977069 | -2.857317 | -1.391375 |
| H  | -3.020597 | -2.664564 | -1.915527 |
| H  | -3.774825 | -3.531945 | -0.533898 |
| H  | -4.649811 | -3.390850 | -2.094694 |
| C  | -4.893715 | -0.603430 | -2.126577 |
| H  | -5.382222 | 0.339079  | -1.803228 |
| H  | -3.948548 | -0.344350 | -2.643093 |
| H  | -5.561932 | -1.099799 | -2.860924 |
| C  | -6.007349 | -1.888732 | -0.280810 |
| H  | -5.900961 | -2.581559 | 0.579555  |
| H  | -6.552004 | -0.984516 | 0.061350  |
| H  | -6.646995 | -2.392694 | -1.033479 |
| C  | -4.124883 | -1.017803 | 4.449026  |
| H  | -4.497284 | -0.862207 | 5.482973  |
| H  | -4.918654 | -1.550336 | 3.886498  |
| H  | -3.238578 | -1.683799 | 4.498904  |
| C  | -5.024131 | 1.241952  | 3.732128  |
| H  | -5.842285 | 0.770783  | 3.150275  |
| H  | -5.411919 | 1.435684  | 4.753988  |
| H  | -4.791452 | 2.219675  | 3.261032  |
| C  | -2.709533 | 1.041939  | 4.681499  |
| H  | -1.787292 | 0.433446  | 4.789553  |
| H  | -2.428233 | 2.039455  | 4.282858  |
| H  | -3.118156 | 1.200352  | 5.700037  |
| C  | -0.941830 | -0.944951 | -4.470807 |
| C  | -0.010841 | 0.154291  | -3.910813 |
| H  | -0.914170 | -0.927007 | -5.583119 |
| H  | 1.001944  | 0.093023  | -4.368833 |
| H  | -0.413725 | 1.183272  | -4.048064 |
| H  | -1.996657 | -0.741530 | -4.187435 |
| C  | -0.542963 | -2.361343 | -3.995794 |
| H  | 0.512319  | -2.595569 | -4.243805 |
| H  | -1.191186 | -3.133024 | -4.456725 |
| C  | -0.828446 | 3.038474  | 0.007317  |

|  |   |           |          |           |
|--|---|-----------|----------|-----------|
|  | C | 1.345220  | 3.377784 | -1.748340 |
|  | C | 0.556493  | 4.493772 | -1.400474 |
|  | C | -0.548327 | 4.319127 | -0.512008 |
|  | H | -1.685256 | 2.887634 | 0.680925  |
|  | H | 2.189829  | 3.496753 | -2.446008 |
|  | C | -1.413229 | 5.495348 | -0.132687 |
|  | H | -1.887715 | 5.951902 | -1.027732 |
|  | H | -2.218591 | 5.205581 | 0.568876  |
|  | H | -0.813972 | 6.298736 | 0.346517  |
|  | C | 0.872414  | 5.855982 | -1.965190 |
|  | H | 0.009126  | 6.268380 | -2.529857 |
|  | H | 1.092593  | 6.585072 | -1.156200 |
|  | H | 1.744681  | 5.830761 | -2.646251 |

### 6-7 (ethylene)

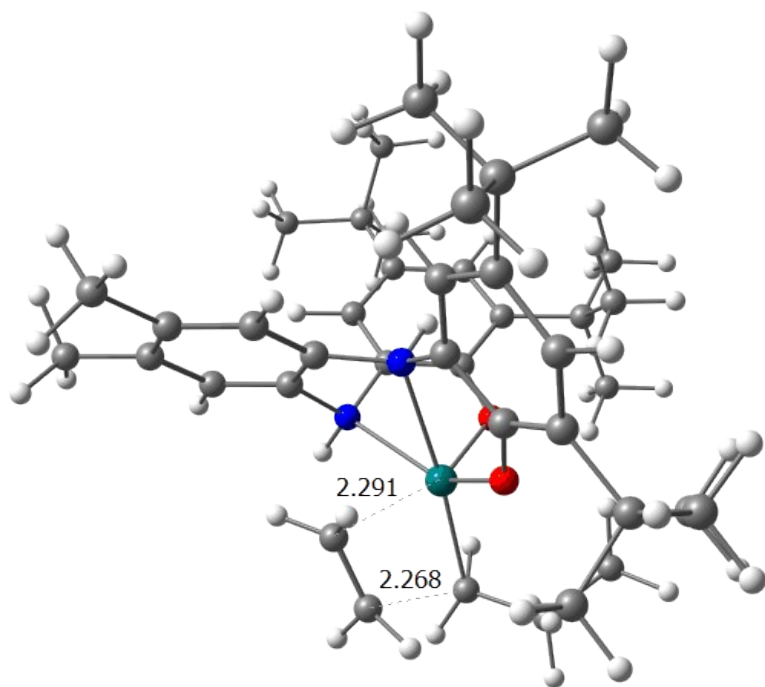

Zero-point correction= 0.909132 (Hartree/Particle)  
 Thermal correction to Energy= 0.979970  
 Thermal correction to Enthalpy= 0.981088  
 Thermal correction to Gibbs Free Energy= 0.800567  
 Sum of electronic and zero-point Energies= -1915.269189  
 Sum of electronic and thermal Energies= -1915.198351  
 Sum of electronic and thermal Enthalpies= -1915.197233  
 Sum of electronic and thermal Free Energies= -1915.377754

Solvent: -1915.8464998

107  
 PhTitBuCH3+etileTS2isomer+ SCF Done: -1916.17832125  
 A.U.

|    |           |           |           |
|----|-----------|-----------|-----------|
| Ti | -0.185375 | -1.021365 | -1.706332 |
| N  | -0.296525 | 0.715793  | -0.142983 |
| O  | -1.839301 | -1.186499 | -0.976914 |
| C  | -2.438985 | -0.363997 | -0.068228 |
| C  | -1.639145 | 0.691170  | 0.422271  |
| C  | -2.102410 | 1.540261  | 1.437044  |
| H  | -1.427731 | 2.302453  | 1.848049  |
| C  | -3.413611 | 1.385947  | 1.928833  |
| C  | -4.208891 | 0.352511  | 1.375792  |
| H  | -5.233230 | 0.238891  | 1.754095  |
| C  | -3.770393 | -0.549639 | 0.387385  |
| C  | 0.279508  | 1.914959  | -0.724853 |
| C  | -3.993382 | 2.283284  | 3.040558  |
| N  | 1.787650  | 0.280535  | -1.711106 |
| O  | 0.938102  | -1.869455 | -0.493700 |
| C  | 2.092119  | -1.387064 | 0.026948  |
| C  | 2.611966  | -0.236552 | -0.598707 |
| C  | 3.786585  | 0.383766  | -0.156383 |
| H  | 4.133621  | 1.294392  | -0.663363 |
| C  | 4.480973  | -0.161101 | 0.940822  |
| C  | 3.934004  | -1.313033 | 1.562480  |
| H  | 4.467431  | -1.726155 | 2.428708  |
| C  | 2.748795  | -1.953829 | 1.154623  |
| C  | 1.408558  | 1.676568  | -1.535020 |
| C  | 5.785814  | 0.456383  | 1.483328  |
| C  | -4.658510 | -1.671635 | -0.182367 |
| C  | 2.154112  | -3.176586 | 1.876728  |
| H  | 0.371751  | 0.345186  | 0.560337  |
| H  | 2.308091  | 0.182722  | -2.598359 |
| H  | -0.804454 | -3.850539 | -0.837903 |
| C  | 6.201987  | 1.713902  | 0.692533  |
| H  | 6.392036  | 1.487378  | -0.377554 |
| H  | 5.434896  | 2.514423  | 0.751970  |
| H  | 7.141769  | 2.127734  | 1.111022  |
| C  | 5.581641  | 0.855938  | 2.967841  |
| H  | 5.338470  | -0.018589 | 3.605147  |
| H  | 6.507382  | 1.314686  | 3.373546  |
| H  | 4.758074  | 1.592686  | 3.071974  |
| C  | 6.923325  | -0.592085 | 1.375554  |
| H  | 7.874546  | -0.169660 | 1.761276  |
| H  | 6.702519  | -1.506645 | 1.962793  |
| H  | 7.084878  | -0.896408 | 0.320643  |
| C  | 3.010654  | -3.602337 | 3.086921  |
| H  | 4.037568  | -3.896767 | 2.786745  |
| H  | 3.084052  | -2.799301 | 3.849471  |
| H  | 2.546668  | -4.481933 | 3.577430  |
| C  | 2.080016  | -4.368747 | 0.887104  |
| H  | 1.449606  | -4.130638 | 0.009102  |
| H  | 3.092489  | -4.644382 | 0.526085  |
| H  | 1.643767  | -5.256225 | 1.391334  |
| C  | 0.732022  | -2.818751 | 2.389257  |
| H  | 0.772827  | -1.963544 | 3.096223  |
| H  | 0.048048  | -2.555708 | 1.558400  |
| H  | 0.293717  | -3.683273 | 2.929849  |
| C  | -4.010648 | -3.046022 | 0.129607  |
| H  | -3.001021 | -3.134266 | -0.313403 |
| H  | -3.920692 | -3.198928 | 1.224784  |
| H  | -4.638145 | -3.865130 | -0.279568 |
| C  | -4.795185 | -1.478288 | -1.716056 |
| H  | -5.277039 | -0.506778 | -1.951177 |
| H  | -3.808582 | -1.503246 | -2.219937 |
| H  | -5.420872 | -2.285673 | -2.150129 |
| C  | -6.073902 | -1.653058 | 0.432024  |
| H  | -6.053051 | -1.818637 | 1.528933  |
| H  | -6.604774 | -0.699529 | 0.230889  |
| H  | -6.680311 | -2.468424 | -0.011848 |
| C  | -4.321201 | 1.403984  | 4.275447  |
| H  | -4.745715 | 2.026480  | 5.090608  |
| H  | -5.063336 | 0.615279  | 4.036007  |
| H  | -3.408353 | 0.905023  | 4.661665  |
| C  | -5.287996 | 2.964499  | 2.526691  |
| H  | -6.069445 | 2.225366  | 2.256733  |
| H  | -5.713368 | 3.622706  | 3.312644  |
| H  | -5.083842 | 3.585978  | 1.630153  |
| C  | -3.001899 | 3.384422  | 3.471703  |
| H  | -2.066538 | 2.962242  | 3.895115  |
| H  | -2.734360 | 4.055434  | 2.628080  |
| H  | -3.460622 | 4.014976  | 4.259947  |
| C  | -1.309897 | -3.517056 | -2.959926 |
| C  | -0.226077 | -2.473288 | -3.328256 |
| H  | -1.499858 | -4.140453 | -3.859557 |
| H  | 0.743112  | -2.665691 | -2.783328 |
| H  | 0.061274  | -2.525339 | -4.391080 |
| H  | -2.275707 | -3.008587 | -2.747031 |
| C  | -0.947838 | -4.426607 | -1.775571 |
| H  | -0.008313 | -4.985226 | -1.968488 |
| H  | -1.751086 | -5.167650 | -1.591041 |
| C  | -0.237484 | 3.211319  | -0.637723 |

|  |   |           |           |           |
|--|---|-----------|-----------|-----------|
|  | C | 2.037695  | 2.733429  | -2.200114 |
|  | C | 1.542310  | 4.052327  | -2.098001 |
|  | C | 0.378896  | 4.288601  | -1.315344 |
|  | H | -1.151373 | 3.396443  | -0.056953 |
|  | H | 2.914539  | 2.528244  | -2.836351 |
|  | C | -0.198723 | 5.678805  | -1.208475 |
|  | H | -0.460119 | 6.086713  | -2.208338 |
|  | H | -1.112158 | 5.700470  | -0.583304 |
|  | H | 0.533846  | 6.386865  | -0.764783 |
|  | C | 2.227783  | 5.185673  | -2.821149 |
|  | H | 1.540231  | 5.687381  | -3.535306 |
|  | H | 2.565670  | 5.970277  | -2.110689 |
|  | H | 3.113299  | 4.839490  | -3.388561 |
|  | C | -0.946517 | 0.592914  | -3.143529 |
|  | C | -1.102880 | -0.495418 | -4.008623 |
|  | H | -0.183112 | 1.353070  | -3.368678 |
|  | H | -1.796888 | 0.933372  | -2.527122 |
|  | H | -2.062635 | -1.033215 | -4.077030 |
|  | H | -0.468620 | -0.559884 | -4.905035 |

## 2 (1-butene)

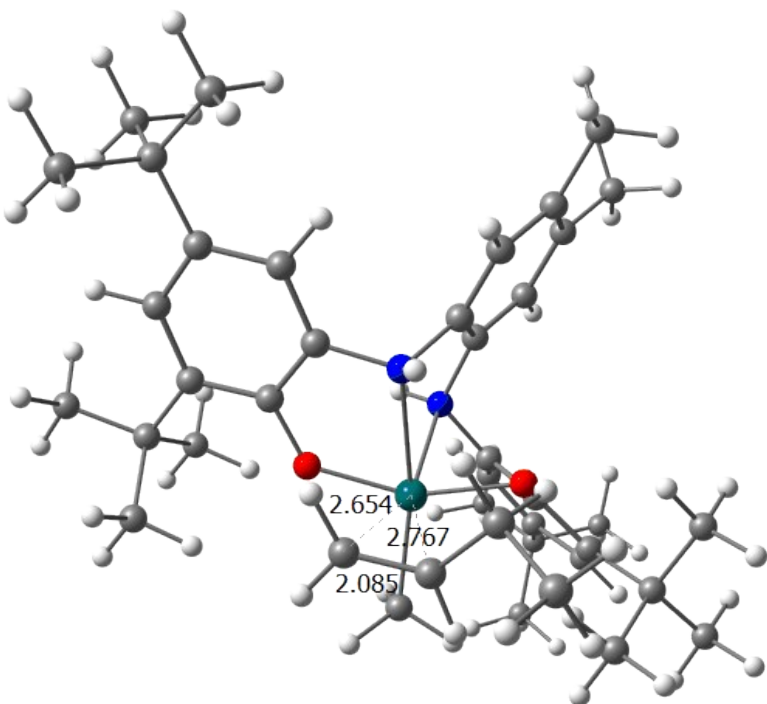

Zero-point correction= 0.907412 (Hartree/Particle)  
 Thermal correction to Energy= 0.980074  
 Thermal correction to Enthalpy= 0.981192  
 Thermal correction to Gibbs Free Energy= 0.796319  
 Sum of electronic and zero-point Energies= -1915.286956  
 Sum of electronic and thermal Energies= -1915.214293  
 Sum of electronic and thermal Enthalpies= -1915.213175  
 Sum of electronic and thermal Free Energies= -1915.398048

Solvent: -1915.8670269

107

PhTitBuCH3+buteneTS+PRE SCF Done: -1916.19436713 A.U.

|    |           |           |           |
|----|-----------|-----------|-----------|
| Ti | 0.412593  | -0.644377 | 1.023927  |
| N  | 0.494328  | -0.107724 | -1.063681 |
| O  | 1.562111  | 0.910373  | 1.083881  |
| C  | 2.461400  | 0.331769  | 0.258550  |
| C  | 1.916359  | -0.316860 | -0.896159 |
| C  | 2.693420  | -1.130203 | -1.741872 |
| H  | 2.210540  | -1.622300 | -2.597769 |
| C  | 4.061342  | -1.275483 | -1.479155 |
| C  | 4.607981  | -0.543219 | -0.383820 |
| H  | 5.689788  | -0.626037 | -0.215465 |
| C  | 3.872622  | 0.260984  | 0.495632  |
| C  | 0.057445  | 1.264383  | -1.327459 |
| C  | 4.984404  | -2.164316 | -2.333261 |
| N  | -1.319437 | 1.023981  | 0.678723  |
| O  | -1.121404 | -1.614598 | 0.695806  |
| C  | -2.347802 | -1.160804 | 0.349111  |
| C  | -2.515588 | 0.242733  | 0.341247  |
| C  | -3.744815 | 0.827006  | 0.012300  |
| H  | -3.825769 | 1.922557  | 0.005914  |
| C  | -4.845090 | 0.009488  | -0.312494 |
| C  | -4.647427 | -1.394210 | -0.301974 |
| H  | -5.502471 | -2.032325 | -0.560226 |
| C  | -3.430372 | -2.023667 | 0.018430  |
| C  | -0.830702 | 1.848226  | -0.411487 |
| C  | -6.229479 | 0.584556  | -0.673092 |
| C  | 4.516527  | 1.061302  | 1.641939  |
| C  | -3.246512 | -3.553461 | 0.015926  |
| H  | 0.068316  | -0.788787 | -1.710199 |
| H  | -1.511315 | 1.627159  | 1.491111  |
| H  | 1.746355  | -2.828128 | 0.883194  |
| C  | -6.241924 | 2.126862  | -0.636085 |
| H  | -6.001728 | 2.519430  | 0.374295  |
| H  | -5.526608 | 2.565176  | -1.363298 |
| H  | -7.251287 | 2.501715  | -0.901072 |
| C  | -6.614772 | 0.124710  | -2.103320 |
| H  | -6.676846 | -0.979732 | -2.183169 |
| H  | -7.607515 | 0.534437  | -2.383454 |
| H  | -5.872793 | 0.478627  | -2.848911 |
| C  | -7.276070 | 0.059067  | 0.343615  |
| H  | -8.282610 | 0.460149  | 0.102614  |
| H  | -7.347536 | -1.047675 | 0.331928  |
| H  | -7.018742 | 0.371931  | 1.376800  |
| C  | -4.545216 | -4.287538 | -0.379695 |
| H  | -5.373300 | -4.079672 | 0.329151  |
| H  | -4.882685 | -4.017412 | -1.401828 |
| H  | -4.369917 | -5.382450 | -0.368557 |
| C  | -2.833613 | -4.022943 | 1.436599  |
| H  | -1.877099 | -3.562985 | 1.752724  |
| H  | -3.613998 | -3.759782 | 2.180351  |
| H  | -2.705863 | -5.125310 | 1.451011  |
| C  | -2.143645 | -3.933352 | -1.008880 |
| H  | -2.420173 | -3.593535 | -2.029058 |
| H  | -1.166178 | -3.486970 | -0.738013 |
| H  | -2.015227 | -5.035351 | -1.040405 |
| C  | 3.987044  | 0.542981  | 3.003522  |
| H  | 2.888392  | 0.642326  | 3.065066  |
| H  | 4.255690  | -0.522379 | 3.157953  |
| H  | 4.433931  | 1.129703  | 3.832652  |
| C  | 4.146021  | 2.559014  | 1.471232  |
| H  | 4.523644  | 2.951068  | 0.504215  |
| H  | 3.050195  | 2.714512  | 1.505206  |
| H  | 4.606002  | 3.157193  | 2.285054  |
| C  | 6.054061  | 0.934610  | 1.638122  |
| H  | 6.388924  | -0.110788 | 1.801091  |
| H  | 6.500285  | 1.302617  | 0.690975  |
| H  | 6.476765  | 1.545295  | 2.461378  |
| C  | 5.626382  | -3.240296 | -1.419271 |
| H  | 6.296767  | -3.895411 | -2.013425 |
| H  | 6.235201  | -2.791497 | -0.608068 |
| H  | 4.849742  | -3.878026 | -0.948529 |
| C  | 6.094080  | -1.284103 | -2.966969 |
| H  | 6.717930  | -0.780325 | -2.200848 |
| H  | 6.770024  | -1.910193 | -3.585510 |
| H  | 5.657187  | -0.500132 | -3.619591 |
| C  | 4.215540  | -2.875430 | -3.465089 |
| H  | 3.416516  | -3.537930 | -3.071166 |
| H  | 3.758620  | -2.154934 | -4.175522 |
| H  | 4.911333  | -3.511341 | -4.048545 |
| C  | 0.204451  | 0.221641  | 3.644088  |
| C  | -0.848853 | -0.591839 | 3.358188  |
| H  | 1.165422  | -0.252556 | 3.922132  |
| H  | -0.771175 | -1.686668 | 3.436956  |
| H  | -1.852618 | -0.190135 | 3.136284  |
| C  | 0.174115  | 1.724164  | 3.712891  |
| H  | 0.777875  | 2.124771  | 2.868369  |
| H  | -0.869102 | 2.088368  | 3.578426  |
| C  | 1.574534  | -2.196682 | 1.789374  |
| H  | 1.063411  | -2.822434 | 2.551324  |



|  |   |           |           |           |
|--|---|-----------|-----------|-----------|
|  | H | 2.563715  | -1.869701 | 2.171731  |
|  | C | 0.569982  | 2.007442  | -2.397101 |
|  | C | -1.193624 | 3.192865  | -0.579649 |
|  | C | -0.691643 | 3.959945  | -1.650994 |
|  | C | 0.200517  | 3.354581  | -2.584002 |
|  | H | 1.290811  | 1.532083  | -3.081595 |
|  | H | -1.879563 | 3.659050  | 0.146360  |
|  | C | 0.754981  | 4.149610  | -3.740637 |
|  | H | 1.316375  | 5.040633  | -3.386417 |
|  | H | 1.438089  | 3.544792  | -4.367691 |
|  | H | -0.057782 | 4.532334  | -4.394575 |
|  | C | -1.093078 | 5.405674  | -1.808630 |
|  | H | -0.206947 | 6.075419  | -1.781505 |
|  | H | -1.587190 | 5.581742  | -2.788048 |
|  | H | -1.790122 | 5.731625  | -1.012685 |
|  | C | 0.754476  | 2.247909  | 5.040518  |
|  | H | 0.180565  | 1.873345  | 5.912340  |
|  | H | 1.810004  | 1.927362  | 5.163097  |
|  | H | 0.734067  | 3.355695  | 5.065111  |

**2-3 (isomer) (1-butene)**

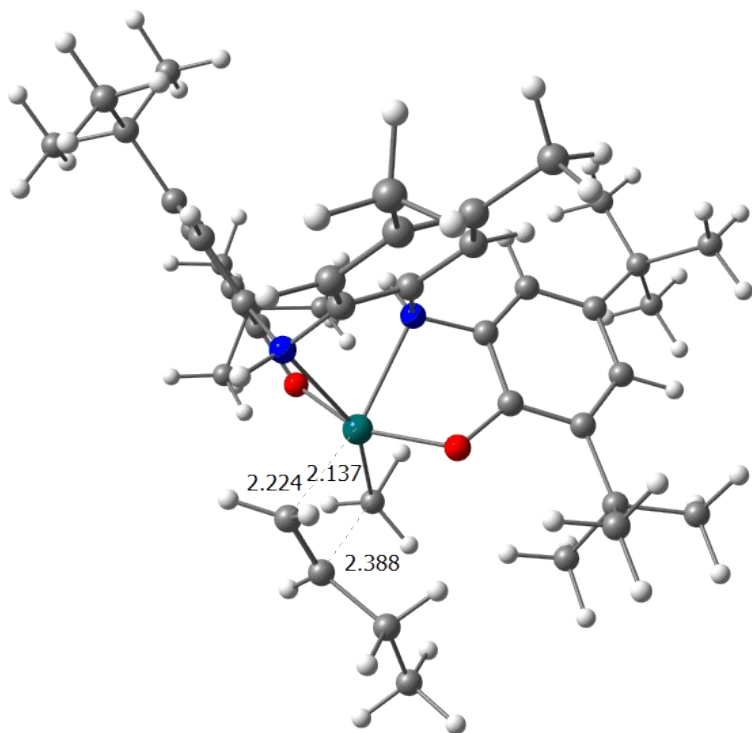

Zero-point correction= 0.908201 (Hartree/Particle)  
 Thermal correction to Energy= 0.979120  
 Thermal correction to Enthalpy= 0.980238  
 Thermal correction to Gibbs Free Energy= 0.799386  
 Sum of electronic and zero-point Energies= -1915.280697  
 Sum of electronic and thermal Energies= -1915.209778  
 Sum of electronic and thermal Enthalpies= -1915.208660  
 Sum of electronic and thermal Free Energies= -1915.389512

Solvent: -1915.8607013

107

PhTitBuCH3+buteneTS+ SCF Done: -1916.18889756 A.U.

|    |           |           |           |
|----|-----------|-----------|-----------|
| Ti | 0.174910  | 1.679391  | -0.547078 |
| N  | 0.135949  | -0.519977 | 0.127472  |
| O  | 1.900458  | 1.005559  | -0.876349 |
| C  | 2.436256  | 0.072822  | -0.036599 |
| C  | 1.481301  | -0.728198 | 0.631642  |
| C  | 1.834358  | -1.664686 | 1.607319  |
| H  | 1.046102  | -2.257458 | 2.092248  |
| C  | 3.197754  | -1.839430 | 1.924349  |
| C  | 4.142900  | -1.065556 | 1.207158  |
| H  | 5.204940  | -1.216563 | 1.440922  |
| C  | 3.820176  | -0.103114 | 0.227213  |
| C  | -0.129935 | -1.266649 | -1.107140 |
| C  | 3.680060  | -2.843327 | 2.990263  |
| N  | -1.578916 | 0.600744  | -1.669096 |
| O  | -1.276547 | 1.875974  | 0.609062  |
| C  | -2.419082 | 1.151601  | 0.541127  |
| C  | -2.658237 | 0.477070  | -0.673406 |
| C  | -3.806533 | -0.294335 | -0.886986 |
| H  | -3.928631 | -0.815100 | -1.847264 |
| C  | -4.764128 | -0.402079 | 0.139893  |
| C  | -4.492309 | 0.260250  | 1.364174  |
| H  | -5.227639 | 0.156571  | 2.172800  |
| C  | -3.340503 | 1.029345  | 1.618800  |
| C  | -0.987538 | -0.666420 | -2.045629 |
| C  | -6.061955 | -1.220059 | -0.015217 |
| C  | 4.888117  | 0.735239  | -0.498765 |
| C  | -3.046249 | 1.683173  | 2.982306  |
| H  | -0.591201 | -0.703268 | 0.839204  |
| H  | -1.940792 | 1.070246  | -2.511595 |
| H  | 1.150960  | 2.350837  | 1.205866  |
| C  | -6.184529 | -1.847289 | -1.419413 |
| H  | -6.201573 | -1.075402 | -2.217181 |
| H  | -5.356003 | -2.555015 | -1.632393 |
| H  | -7.131593 | -2.419081 | -1.494967 |
| C  | -6.071958 | -2.361240 | 1.034940  |
| H  | -6.033437 | -1.971721 | 2.072757  |
| H  | -6.999189 | -2.964036 | 0.940033  |
| H  | -5.204599 | -3.039337 | 0.893684  |
| C  | -7.280060 | -0.288540 | 0.214964  |
| H  | -8.226406 | -0.858525 | 0.107006  |
| H  | -7.275788 | 0.159020  | 1.229831  |
| H  | -7.291911 | 0.541357  | -0.521697 |
| C  | -4.161699 | 1.400499  | 4.010527  |
| H  | -5.139602 | 1.812984  | 3.686697  |
| H  | -4.286618 | 0.315028  | 4.205124  |
| H  | -3.905308 | 1.881345  | 4.976424  |
| C  | -2.921329 | 3.219206  | 2.807254  |
| H  | -2.105136 | 3.481179  | 2.106309  |
| H  | -3.867309 | 3.648500  | 2.417324  |
| H  | -2.706062 | 3.697800  | 3.785485  |
| C  | -1.716454 | 1.102074  | 3.536284  |
| H  | -1.791752 | 0.001812  | 3.667775  |
| H  | -0.864403 | 1.321970  | 2.862479  |
| H  | -1.487871 | 1.545907  | 4.527502  |
| C  | 4.694599  | 2.222525  | -0.109706 |
| H  | 3.678279  | 2.566514  | -0.373319 |
| H  | 4.837174  | 2.370401  | 0.980679  |
| H  | 5.425468  | 2.864326  | -0.644362 |
| C  | 4.724339  | 0.558937  | -2.031282 |
| H  | 4.880406  | -0.500156 | -2.323467 |
| H  | 3.716417  | 0.862517  | -2.375681 |
| H  | 5.475329  | 1.174722  | -2.569030 |
| C  | 6.321849  | 0.314518  | -0.114555 |
| H  | 6.527333  | 0.466263  | 0.965168  |
| H  | 6.524343  | -0.747453 | -0.364377 |
| H  | 7.051198  | 0.932445  | -0.676783 |
| C  | 4.480529  | -2.083608 | 4.079617  |
| H  | 4.836441  | -2.789975 | 4.858267  |
| H  | 5.372280  | -1.573609 | 3.661610  |
| H  | 3.849589  | -1.315584 | 4.573063  |
| C  | 4.592004  | -3.900415 | 2.314678  |
| H  | 5.485224  | -3.440454 | 1.844781  |
| H  | 4.951468  | -4.635449 | 3.064669  |
| H  | 4.042160  | -4.455462 | 1.526226  |
| C  | 2.503419  | -3.573619 | 3.670289  |
| H  | 1.822190  | -2.867326 | 4.189539  |
| H  | 1.907697  | -4.168827 | 2.946661  |
| H  | 2.888127  | -4.279574 | 4.433928  |
| C  | 0.751694  | 3.949230  | -1.709773 |
| C  | -0.191160 | 3.064007  | -2.249186 |
| H  | 0.370929  | 4.830654  | -1.166909 |
| H  | -1.262645 | 3.308504  | -2.147087 |
| H  | 0.103669  | 2.427824  | -3.106799 |
| C  | 2.169246  | 4.025201  | -2.231639 |
| H  | 2.066889  | 4.207869  | -3.326724 |
| H  | 2.642547  | 3.022665  | -2.152264 |
| C  | 1.059000  | 3.278362  | 0.561621  |
| H  | 0.344695  | 3.968211  | 1.047158  |
| H  | 2.073430  | 3.704512  | 0.496420  |

|  |   |           |           |           |
|--|---|-----------|-----------|-----------|
|  | C | 0.498482  | -2.478375 | -1.424282 |
|  | C | -1.221546 | -1.286447 | -3.281838 |
|  | C | -0.597660 | -2.506595 | -3.611233 |
|  | C | 0.274370  | -3.114824 | -2.661766 |
|  | H | 1.194665  | -2.925942 | -0.699050 |
|  | H | -1.899414 | -0.806133 | -4.006721 |
|  | C | 0.960000  | -4.420585 | -2.981687 |
|  | H | 1.592112  | -4.332771 | -3.891321 |
|  | H | 1.606724  | -4.760971 | -2.150261 |
|  | H | 0.222170  | -5.224604 | -3.190784 |
|  | C | -0.850106 | -3.159603 | -4.947413 |
|  | H | 0.094755  | -3.291510 | -5.516941 |
|  | H | -1.282871 | -4.175403 | -4.823360 |
|  | H | -1.545339 | -2.568433 | -5.574282 |
|  | C | 3.052144  | 5.115814  | -1.619558 |
|  | H | 4.043257  | 5.134058  | -2.113988 |
|  | H | 2.595738  | 6.120008  | -1.740126 |
|  | H | 3.232085  | 4.955578  | -0.537577 |

## 2-3 (isomer) (1-butene)

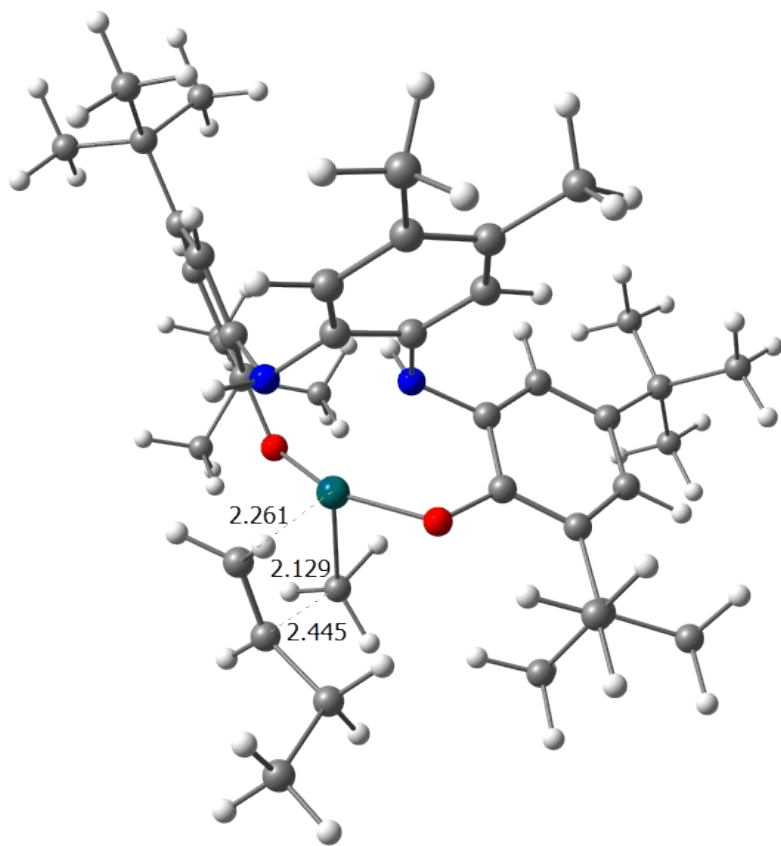

Zero-point correction= 0.908350 (Hartree/Particle)  
 Thermal correction to Energy= 0.979421  
 Thermal correction to Enthalpy= 0.980539  
 Thermal correction to Gibbs Free Energy= 0.798684  
 Sum of electronic and zero-point Energies= -1915.281244  
 Sum of electronic and thermal Energies= -1915.210173  
 Sum of electronic and thermal Enthalpies= -1915.209055  
 Sum of electronic and thermal Free Energies= -1915.390910

Solvent: -1915.8623721

107

PhTitBuCH3+buteneTS90+ SCF Done: -1916.18959390 A.U.

|    |           |           |           |
|----|-----------|-----------|-----------|
| Ti | -0.185202 | 1.731187  | -0.368170 |
| N  | -0.149889 | -0.524054 | 0.078989  |
| O  | -1.912806 | 1.295649  | 0.230027  |
| C  | -2.447756 | 0.078072  | -0.074012 |
| C  | -1.492353 | -0.944214 | -0.280685 |
| C  | -1.842784 | -2.227207 | -0.709809 |
| H  | -1.054141 | -2.978761 | -0.854655 |
| C  | -3.204864 | -2.526290 | -0.923515 |
| C  | -4.151058 | -1.505888 | -0.658115 |
| H  | -5.212168 | -1.746980 | -0.804964 |
| C  | -3.830526 | -0.197991 | -0.236698 |
| C  | 0.096371  | -0.593870 | 1.524521  |
| C  | -3.684615 | -3.908692 | -1.409062 |
| N  | 1.547371  | 1.321967  | 1.159819  |
| O  | 1.286366  | 1.355345  | -1.452895 |
| C  | 2.416204  | 0.740395  | -1.030546 |
| C  | 2.636179  | 0.730020  | 0.361670  |
| C  | 3.765301  | 0.134480  | 0.936043  |
| H  | 3.869487  | 0.132756  | 2.030210  |
| C  | 4.722504  | -0.473076 | 0.100622  |
| C  | 4.470164  | -0.475657 | -1.294993 |
| H  | 5.204476  | -0.971843 | -1.943329 |
| C  | 3.337955  | 0.098399  | -1.904196 |
| C  | 0.937509  | 0.385910  | 2.081094  |
| C  | 5.995978  | -1.148591 | 0.648134  |
| C  | -4.896890 | 0.885832  | 0.002132  |
| C  | 3.059318  | 0.015933  | -3.416857 |
| H  | 0.582392  | -1.028140 | -0.449114 |
| H  | 1.906849  | 2.131097  | 1.686206  |
| H  | -1.131872 | 1.469203  | -2.273795 |
| C  | 6.099424  | -1.028341 | 2.182923  |
| H  | 6.141770  | 0.030879  | 2.512745  |
| H  | 5.249242  | -1.523145 | 2.697803  |
| H  | 7.027974  | -1.520583 | 2.536602  |
| C  | 5.971674  | -2.653116 | 0.272835  |
| H  | 5.946693  | -2.806623 | -0.825293 |
| H  | 6.878892  | -3.162450 | 0.659771  |
| H  | 5.082702  | -3.156364 | 0.707044  |
| C  | 7.241336  | -0.473163 | 0.017634  |
| H  | 8.170485  | -0.939612 | 0.406336  |
| H  | 7.255386  | -0.575391 | -1.086645 |
| H  | 7.272097  | 0.609488  | 0.258915  |
| C  | 4.176205  | -0.739418 | -4.167140 |
| H  | 5.159597  | -0.236484 | -4.061144 |
| H  | 4.279995  | -1.787913 | -3.818119 |
| H  | 3.938468  | -0.773753 | -5.249716 |
| C  | 2.954204  | 1.446077  | -4.007872 |
| H  | 2.140036  | 2.024029  | -3.528895 |
| H  | 3.904966  | 2.000544  | -3.866939 |
| H  | 2.747856  | 1.394031  | -5.097311 |
| C  | 1.724471  | -0.748641 | -3.633625 |
| H  | 1.787523  | -1.776552 | -3.217653 |
| H  | 0.872922  | -0.224071 | -3.155958 |
| H  | 1.503365  | -0.835833 | -4.717800 |
| C  | -4.698054 | 2.008729  | -1.047945 |
| H  | -3.683790 | 2.440509  | -0.970647 |
| H  | -4.832468 | 1.616249  | -2.077109 |
| H  | -5.435809 | 2.823125  | -0.889839 |
| C  | -4.735106 | 1.459939  | 1.434060  |
| H  | -4.886299 | 0.666716  | 2.195198  |
| H  | -3.729209 | 1.896602  | 1.589008  |
| H  | -5.489711 | 2.253782  | 1.614422  |
| C  | -6.331051 | 0.334604  | -0.138457 |
| H  | -6.538005 | -0.042290 | -1.161326 |
| H  | -6.534455 | -0.482453 | 0.584439  |
| H  | -7.059584 | 1.145812  | 0.064243  |
| C  | -4.470279 | -3.736002 | -2.735030 |
| H  | -4.814696 | -4.722450 | -3.109668 |
| H  | -5.367863 | -3.097917 | -2.605588 |
| H  | -3.833889 | -3.273247 | -3.517558 |
| C  | -4.608485 | -4.533538 | -0.331695 |
| H  | -5.502545 | -3.907153 | -0.135460 |
| H  | -4.966531 | -5.530763 | -0.662538 |
| H  | -4.067068 | -4.664042 | 0.628425  |
| C  | -2.506968 | -4.873264 | -1.661618 |
| H  | -1.813515 | -4.488586 | -2.438593 |
| H  | -1.924617 | -5.069829 | -0.736972 |
| H  | -2.891845 | -5.849830 | -2.018886 |
| C  | -0.734168 | 4.297288  | -0.401161 |
| C  | 0.185142  | 3.781033  | 0.509918  |
| H  | -0.341858 | 4.806084  | -1.297464 |
| H  | 1.263360  | 3.936009  | 0.333523  |
| H  | -0.142347 | 3.592103  | 1.551442  |
| C  | -2.160606 | 4.597891  | -0.021226 |
| H  | -2.809733 | 4.591279  | -0.918842 |
| H  | -2.541575 | 3.811141  | 0.662268  |
| C  | -1.034581 | 2.586987  | -2.123084 |
| H  | -0.305834 | 2.972830  | -2.859555 |
| H  | -2.042295 | 3.013741  | -2.260584 |

|  |   |           |           |           |
|--|---|-----------|-----------|-----------|
|  | C | -0.533736 | -1.519229 | 2.367477  |
|  | C | 1.146420  | 0.428504  | 3.467413  |
|  | C | 0.517493  | -0.496149 | 4.325109  |
|  | C | -0.331449 | -1.493239 | 3.762207  |
|  | H | -1.214138 | -2.264723 | 1.929163  |
|  | H | 1.811486  | 1.200481  | 3.888864  |
|  | C | -1.016077 | -2.503074 | 4.650455  |
|  | H | -1.671182 | -2.005997 | 5.397798  |
|  | H | -1.639752 | -3.208383 | 4.068256  |
|  | H | -0.277735 | -3.098316 | 5.229353  |
|  | C | 0.741908  | -0.434420 | 5.815571  |
|  | H | -0.214972 | -0.288220 | 6.360876  |
|  | H | 1.175435  | -1.383689 | 6.196923  |
|  | H | 1.424816  | 0.389552  | 6.099205  |
|  | C | -2.238603 | 5.985042  | 0.655293  |
|  | H | -1.645797 | 6.012295  | 1.592251  |
|  | H | -1.860103 | 6.787124  | -0.011343 |
|  | H | -3.291813 | 6.223079  | 0.906411  |

## 2-3 (isomer) (1-butene)

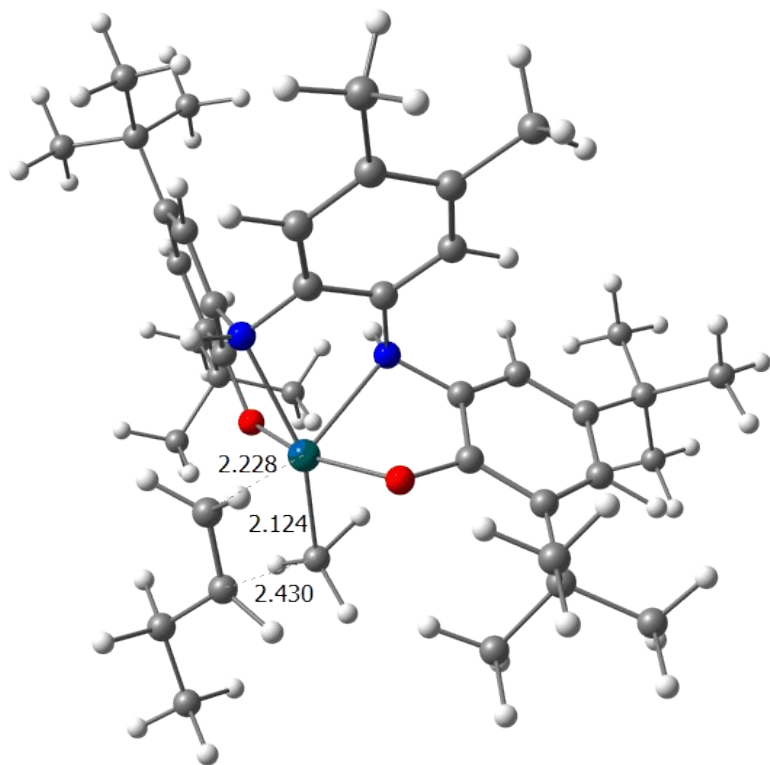

Zero-point correction= 0.908261 (Hartree/Particle)  
 Thermal correction to Energy= 0.979228  
 Thermal correction to Enthalpy= 0.980347  
 Thermal correction to Gibbs Free Energy= 0.798437  
 Sum of electronic and zero-point Energies= -1915.279527  
 Sum of electronic and thermal Energies= -1915.208560  
 Sum of electronic and thermal Enthalpies= -1915.207441  
 Sum of electronic and thermal Free Energies= -1915.389351

Solvent: -1915.8612312

107

PhTitBuCH3+buteneTSisomer+ SCF Done: -1916.18778794 A.U.

|    |           |           |           |
|----|-----------|-----------|-----------|
| Ti | 0.138894  | 1.407921  | -0.896636 |
| N  | 0.333687  | -0.548529 | 0.277929  |
| O  | 1.860002  | 0.763782  | -1.277535 |
| C  | 2.548750  | 0.140608  | -0.280526 |
| C  | 1.735172  | -0.514291 | 0.674173  |
| C  | 2.262802  | -1.106776 | 1.825432  |
| H  | 1.585429  | -1.602226 | 2.535256  |
| C  | 3.657589  | -1.064547 | 2.036272  |
| C  | 4.456531  | -0.440557 | 1.046122  |
| H  | 5.542518  | -0.423925 | 1.206807  |
| C  | 3.957524  | 0.171732  | -0.122703 |
| C  | 0.051446  | -1.617113 | -0.690367 |
| C  | 4.327904  | -1.674316 | 3.283845  |
| N  | -1.516331 | -0.040171 | -1.684001 |
| O  | -1.321971 | 1.789235  | 0.202287  |
| C  | -2.416638 | 1.000788  | 0.321186  |
| C  | -2.595945 | 0.024580  | -0.680034 |
| C  | -3.688444 | -0.850783 | -0.680637 |
| H  | -3.764346 | -1.608653 | -1.473076 |
| C  | -4.650137 | -0.754899 | 0.343567  |
| C  | -4.445425 | 0.225033  | 1.347954  |
| H  | -5.187328 | 0.289000  | 2.155116  |
| C  | -3.352421 | 1.111598  | 1.387586  |
| C  | -0.856293 | -1.330872 | -1.724076 |
| C  | -5.885321 | -1.675003 | 0.412080  |
| C  | 4.861302  | 0.842192  | -1.173933 |
| C  | -3.138475 | 2.135820  | 2.518378  |
| H  | -0.307115 | -0.599776 | 1.087224  |
| H  | -1.902176 | 0.170183  | -2.615952 |
| H  | 1.173361  | 2.364924  | 0.653395  |
| C  | -5.916852 | -2.685578 | -0.753891 |
| H  | -5.963368 | -2.178792 | -1.740597 |
| H  | -5.032980 | -3.357611 | -0.745322 |
| H  | -6.817914 | -3.326803 | -0.672398 |
| C  | -5.858233 | -2.465939 | 1.745631  |
| H  | -5.889431 | -1.795251 | 2.628407  |
| H  | -6.736546 | -3.141514 | 1.810826  |
| H  | -4.940651 | -3.085778 | 1.821683  |
| C  | -7.168476 | -0.806827 | 0.346111  |
| H  | -8.071930 | -1.449385 | 0.400910  |
| H  | -7.223197 | -0.082897 | 1.184656  |
| H  | -7.211656 | -0.231672 | -0.601942 |
| C  | -4.262012 | 2.071304  | 3.573796  |
| H  | -5.255963 | 2.301554  | 3.137480  |
| H  | -4.317732 | 1.077628  | 4.065057  |
| H  | -4.069223 | 2.821055  | 4.367898  |
| C  | -3.112257 | 3.567546  | 1.920837  |
| H  | -2.293644 | 3.683221  | 1.183737  |
| H  | -4.072599 | 3.799548  | 1.415524  |
| H  | -2.961306 | 4.315111  | 2.727517  |
| C  | -1.789643 | 1.831183  | 3.225036  |
| H  | -1.792991 | 0.807417  | 3.655343  |
| H  | -0.935731 | 1.919527  | 2.524321  |
| H  | -1.622539 | 2.546666  | 4.056933  |
| C  | 4.493348  | 2.344823  | -1.294053 |
| C  | 3.448764  | 2.471220  | -1.638365 |
| H  | 4.607885  | 2.861789  | -0.318410 |
| H  | 5.161147  | 2.844195  | -2.026459 |
| C  | 4.643884  | 0.138729  | -2.539779 |
| H  | 4.917160  | -0.934835 | -2.477086 |
| H  | 3.588598  | 0.209599  | -2.870058 |
| H  | 5.281658  | 0.608806  | -3.317384 |
| C  | 6.354749  | 0.738273  | -0.800969 |
| H  | 6.583436  | 1.253855  | 0.154849  |
| H  | 6.690461  | -0.316154 | -0.718954 |
| H  | 6.968438  | 1.218454  | -1.589990 |
| C  | 5.050353  | -0.547853 | 4.067539  |
| H  | 5.543878  | -0.962476 | 4.971269  |
| H  | 5.833249  | -0.054612 | 3.456161  |
| H  | 4.331826  | 0.232277  | 4.393993  |
| C  | 5.358065  | -2.744808 | 2.839509  |
| H  | 6.162001  | -2.313887 | 2.208558  |
| H  | 5.843167  | -3.204238 | 3.725772  |
| H  | 4.867325  | -3.553247 | 2.258551  |
| C  | 3.303442  | -2.344456 | 4.223091  |
| H  | 2.552031  | -1.621446 | 4.604084  |
| H  | 2.767043  | -3.180015 | 3.725897  |
| H  | 3.824571  | -2.769015 | 5.104906  |
| C  | 0.360872  | 3.518671  | -2.429502 |
| C  | -0.311203 | 2.368746  | -2.855425 |
| H  | 1.449356  | 3.570522  | -2.610210 |
| H  | -1.409011 | 2.417105  | -2.966310 |
| H  | 0.229395  | 1.617986  | -3.463045 |
| C  | -0.356936 | 4.828047  | -2.190825 |
| H  | -0.798523 | 5.088830  | -3.181846 |
| H  | -1.230875 | 4.653842  | -1.525333 |
| C  | 0.986559  | 3.187458  | -0.105318 |
| H  | 0.280045  | 3.904468  | 0.349054  |

|  |   |           |           |           |
|--|---|-----------|-----------|-----------|
|  | H | 1.970899  | 3.635008  | -0.325840 |
|  | C | 0.714070  | -2.851886 | -0.677518 |
|  | C | -1.093718 | -2.277779 | -2.731359 |
|  | C | -0.432568 | -3.522314 | -2.730462 |
|  | C | 0.482028  | -3.817008 | -1.677702 |
|  | H | 1.446139  | -3.057356 | 0.118014  |
|  | H | -1.808038 | -2.039492 | -3.536658 |
|  | C | 1.205616  | -5.140830 | -1.642216 |
|  | H | 1.808773  | -5.296163 | -2.562351 |
|  | H | 1.886813  | -5.214735 | -0.772797 |
|  | H | 0.491850  | -5.990776 | -1.589580 |
|  | C | -0.690437 | -4.528302 | -3.824543 |
|  | H | 0.245906  | -4.784766 | -4.364969 |
|  | H | -1.081550 | -5.482131 | -3.410221 |
|  | H | -1.421338 | -4.155805 | -4.568080 |
|  | C | 0.504874  | 6.000511  | -1.709653 |
|  | H | 1.383811  | 6.146557  | -2.371584 |
|  | H | -0.080452 | 6.941172  | -1.722164 |
|  | H | 0.879140  | 5.856989  | -0.677674 |

## 2-3 (1-butene)

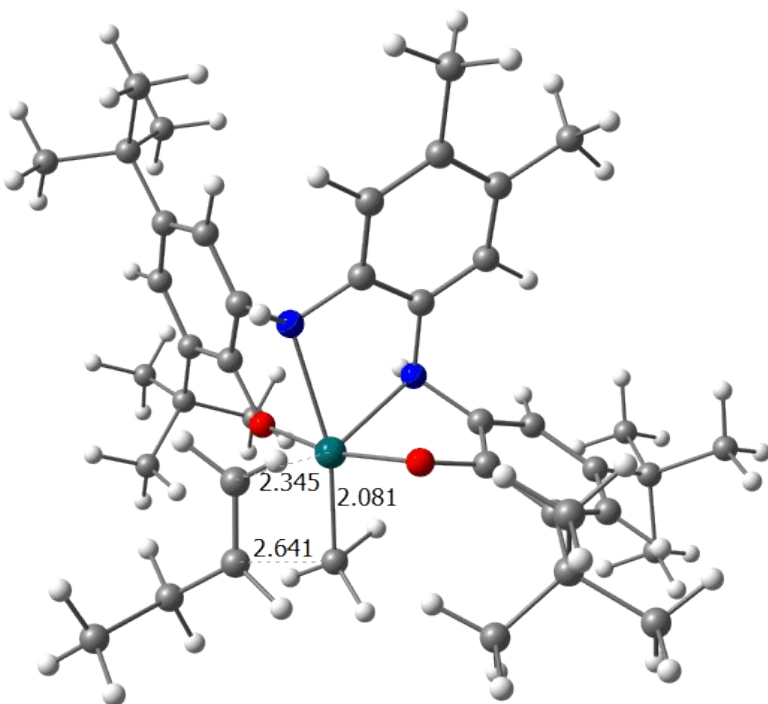

Zero-point correction= 0.907569 (Hartree/Particle)  
 Thermal correction to Energy= 0.978986  
 Thermal correction to Enthalpy= 0.980104  
 Thermal correction to Gibbs Free Energy= 0.797832  
 Sum of electronic and zero-point Energies= -1915.280032  
 Sum of electronic and thermal Energies= -1915.208615  
 Sum of electronic and thermal Enthalpies= -1915.207497  
 Sum of electronic and thermal Free Energies= -1915.389769

Solvent: -1915.8619526

107

PhTiBuCH3+buteneTS90isomer+ SCF Done: -1916.18760088 A.U.

|    |           |           |           |
|----|-----------|-----------|-----------|
| Ti | 0.170502  | 1.339380  | -0.480390 |
| N  | 0.654939  | -0.555803 | 0.593250  |
| O  | 1.728895  | 0.730925  | -1.360134 |
| C  | 2.647504  | 0.242729  | -0.475477 |
| C  | 2.109139  | -0.392919 | 0.669065  |
| C  | 2.905481  | -0.824617 | 1.735893  |
| H  | 2.429711  | -1.298656 | 2.606263  |
| C  | 4.301278  | -0.644429 | 1.661635  |
| C  | 4.824789  | -0.042538 | 0.489783  |
| H  | 5.913712  | 0.085720  | 0.430316  |
| C  | 4.050845  | 0.421842  | -0.593181 |
| C  | 0.277049  | -1.728637 | -0.215311 |
| C  | 5.259400  | -1.081898 | 2.787815  |
| N  | -1.329644 | -0.275997 | -1.374906 |
| O  | -1.376260 | 1.541160  | 0.524446  |
| C  | -2.494078 | 0.781130  | 0.484935  |
| C  | -2.543667 | -0.185110 | -0.542380 |
| C  | -3.659728 | -1.011340 | -0.718863 |
| H  | -3.650390 | -1.762122 | -1.520407 |
| C  | -4.765871 | -0.879243 | 0.143515  |
| C  | -4.687836 | 0.091745  | 1.173624  |
| H  | -5.547453 | 0.187181  | 1.849709  |
| C  | -3.582914 | 0.936789  | 1.387057  |
| C  | -0.659584 | -1.561429 | -1.245855 |
| C  | -6.029584 | -1.752650 | 0.010410  |
| C  | 4.659661  | 1.114360  | -1.826812 |
| C  | -3.521317 | 1.976377  | 2.522740  |
| H  | 0.231240  | -0.612911 | 1.533182  |
| H  | -1.588639 | -0.145865 | -2.363526 |
| H  | 1.308103  | 2.228072  | 1.117085  |
| C  | -5.931086 | -2.737970 | -1.172720 |
| H  | -5.817728 | -2.211192 | -2.143487 |
| H  | -5.083597 | -3.445615 | -1.055042 |
| H  | -6.857603 | -3.343937 | -1.234728 |
| C  | -6.219291 | -2.571092 | 1.314214  |
| H  | -6.343515 | -1.917201 | 2.201285  |
| H  | -7.125812 | -3.207425 | 1.240439  |
| H  | -5.347749 | -3.232947 | 1.499099  |
| C  | -7.260356 | -0.836780 | -0.214860 |
| H  | -8.180615 | -1.448246 | -0.321309 |
| H  | -7.421776 | -0.139493 | 0.632495  |
| H  | -7.141580 | -0.230093 | -1.136466 |
| C  | -4.802113 | 1.965434  | 3.383302  |
| H  | -5.704392 | 2.218795  | 2.789114  |
| H  | -4.968634 | 0.982866  | 3.871550  |
| H  | -4.714096 | 2.723124  | 4.188128  |
| C  | -3.354823 | 3.394380  | 1.914416  |
| H  | -2.415804 | 3.475734  | 1.332825  |
| H  | -4.205536 | 3.638418  | 1.244698  |
| H  | -3.326736 | 4.155529  | 2.721899  |
| C  | -2.313884 | 1.651096  | 3.442514  |
| H  | -2.415681 | 0.636523  | 3.881382  |
| H  | -1.356613 | 1.702412  | 2.886443  |
| H  | -2.261054 | 2.379375  | 4.278599  |
| C  | 4.129536  | 2.571144  | -1.907563 |
| H  | 3.026909  | 2.589210  | -2.008601 |
| H  | 4.410780  | 3.144501  | -0.999490 |
| H  | 4.565945  | 3.088649  | -2.787182 |
| C  | 4.251340  | 0.330805  | -3.101763 |
| H  | 4.639806  | -0.707944 | -3.064213 |
| H  | 3.150821  | 0.286110  | -3.217672 |
| H  | 4.674990  | 0.821103  | -4.003093 |
| C  | 6.200195  | 1.166373  | -1.758566 |
| H  | 6.561124  | 1.749896  | -0.886219 |
| H  | 6.648806  | 0.152494  | -1.711687 |
| H  | 6.594587  | 1.659942  | -2.669973 |
| C  | 6.057302  | 0.151262  | 3.285318  |
| H  | 6.750583  | -0.142847 | 4.100794  |
| H  | 6.668481  | 0.604977  | 2.478638  |
| H  | 5.376371  | 0.934815  | 3.677700  |
| C  | 6.239627  | -2.148166 | 2.233764  |
| H  | 6.850388  | -1.755186 | 1.395492  |
| H  | 6.938709  | -2.478914 | 3.029838  |
| H  | 5.690726  | -3.039310 | 1.864576  |
| C  | 4.502674  | -1.688554 | 3.988102  |
| H  | 3.794197  | -0.963893 | 4.441471  |
| H  | 3.939183  | -2.603061 | 3.707036  |
| H  | 5.223769  | -1.980240 | 4.778355  |
| C  | -0.077045 | 3.571573  | -1.968714 |
| C  | -0.618369 | 2.387371  | -2.423886 |
| H  | 0.976123  | 3.791366  | -2.219009 |
| H  | -1.712092 | 2.240572  | -2.365056 |
| H  | -0.038694 | 1.739419  | -3.105241 |
| C  | -0.902576 | 4.697637  | -1.410090 |
| H  | -1.772621 | 4.282138  | -0.858778 |
| H  | -0.304989 | 5.292090  | -0.689826 |
| C  | 1.016661  | 3.036784  | 0.375154  |
| H  | 0.362639  | 3.751824  | 0.906858  |



|  |   |           |           |           |
|--|---|-----------|-----------|-----------|
|  | H | 1.952851  | 3.502572  | 0.014863  |
|  | C | 0.902520  | -2.972119 | -0.039761 |
|  | C | -0.945804 | -2.639325 | -2.100244 |
|  | C | -0.324813 | -3.892283 | -1.937857 |
|  | C | 0.609440  | -4.066377 | -0.875378 |
|  | H | 1.659566  | -3.081906 | 0.751752  |
|  | H | -1.670763 | -2.497741 | -2.918660 |
|  | C | 1.291360  | -5.395811 | -0.665802 |
|  | H | 1.857743  | -5.706177 | -1.569853 |
|  | H | 1.998685  | -5.367357 | 0.185370  |
|  | H | 0.552412  | -6.201729 | -0.467760 |
|  | C | -0.645028 | -5.033073 | -2.871364 |
|  | H | 0.265106  | -5.388013 | -3.400719 |
|  | H | -1.043308 | -5.908304 | -2.314854 |
|  | H | -1.392991 | -4.746166 | -3.635423 |
|  | C | -1.383655 | 5.618314  | -2.555117 |
|  | H | -2.031681 | 5.068182  | -3.267365 |
|  | H | -1.965395 | 6.466191  | -2.140997 |
|  | H | -0.530005 | 6.039550  | -3.125073 |

### 3 (isomer) (1-butene)

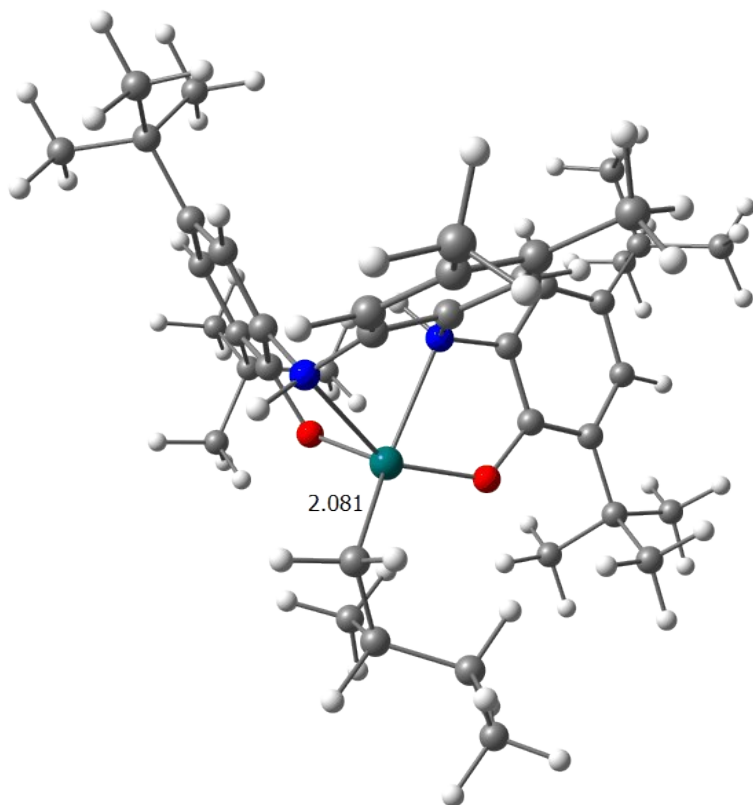

Zero-point correction= 0.910397 (Hartree/Particle)  
 Thermal correction to Energy= 0.981890  
 Thermal correction to Enthalpy= 0.983009  
 Thermal correction to Gibbs Free Energy= 0.798449  
 Sum of electronic and zero-point Energies= -1915.309289  
 Sum of electronic and thermal Energies= -1915.237796  
 Sum of electronic and thermal Enthalpies= -1915.236678  
 Sum of electronic and thermal Free Energies= -1915.421237

Solvent: -1915.8982504

107  
PhTi(Bu)CH<sub>3</sub>+buteneTS+POST SCF Done: -1916.21968617  
A.U.

|    |           |           |           |
|----|-----------|-----------|-----------|
| Ti | 0.218673  | -1.765852 | 0.162844  |
| N  | 0.042116  | 0.451945  | 0.537675  |
| O  | 1.928262  | -1.145271 | -0.131471 |
| C  | 2.261671  | 0.168116  | -0.310990 |
| C  | 1.253644  | 1.086946  | 0.037568  |
| C  | 1.414215  | 2.469280  | -0.108028 |
| H  | 0.588266  | 3.137831  | 0.172494  |
| C  | 2.632055  | 2.963091  | -0.617725 |
| C  | 3.634434  | 2.019597  | -0.953235 |
| H  | 4.580969  | 2.406346  | -1.352638 |
| C  | 3.504647  | 0.621129  | -0.822523 |
| C  | -0.181919 | 0.397229  | 1.971631  |
| C  | 2.896212  | 4.467726  | -0.828733 |
| N  | -1.685954 | -1.371067 | 1.307582  |
| O  | -1.025996 | -1.662994 | -1.187867 |
| C  | -2.206153 | -0.992874 | -1.016128 |
| C  | -2.601282 | -0.775106 | 0.324210  |
| C  | -3.748941 | -0.048594 | 0.659758  |
| H  | -3.994417 | 0.099799  | 1.720808  |
| C  | -4.548974 | 0.476664  | -0.374871 |
| C  | -4.133053 | 0.247058  | -1.711013 |
| H  | -4.751827 | 0.669038  | -2.513850 |
| C  | -2.973877 | -0.462954 | -2.085320 |
| C  | -1.139609 | -0.560733 | 2.372687  |
| C  | -5.832063 | 1.288134  | -0.104680 |
| C  | 4.628022  | -0.364504 | -1.198837 |
| C  | -2.512540 | -0.620568 | -3.546225 |
| H  | -0.803099 | 0.804498  | 0.049282  |
| H  | -2.076303 | -2.249247 | 1.680678  |
| H  | 1.277619  | -3.123240 | -1.469394 |
| C  | -6.119437 | 1.427542  | 1.404785  |
| H  | -6.272766 | 0.441224  | 1.890512  |
| H  | -5.302540 | 1.959241  | 1.936548  |
| H  | -7.046613 | 2.016019  | 1.557688  |
| C  | -5.671338 | 2.707726  | -0.708081 |
| H  | -5.506254 | 2.678176  | -1.804439 |
| H  | -6.586524 | 3.308562  | -0.525911 |
| H  | -4.813229 | 3.241364  | -0.248594 |
| C  | -7.034504 | 0.570251  | -0.770882 |
| H  | -7.971186 | 1.135300  | -0.583455 |
| H  | -6.911821 | 0.485752  | -1.869975 |
| H  | -7.162413 | -0.453923 | -0.363503 |
| C  | -3.512085 | 0.014159  | -4.535712 |
| H  | -4.515028 | -0.456820 | -4.473750 |
| H  | -3.626432 | 1.106149  | -4.373760 |
| C  | -3.145023 | -0.126939 | -5.572442 |
| C  | -2.375927 | -2.127008 | -3.888948 |
| H  | -1.632695 | -2.629459 | -3.239885 |
| H  | -3.349285 | -2.647334 | -3.773699 |
| H  | -2.048232 | -2.248009 | -4.942389 |
| C  | -1.142323 | 0.093063  | -3.711450 |
| H  | -1.230763 | 1.174526  | -3.476736 |
| H  | -0.366695 | -0.345311 | -3.052920 |
| H  | -0.789422 | 0.001363  | -4.759619 |
| C  | 4.104516  | -1.380929 | -2.247201 |
| C  | 3.269626  | -1.985813 | -1.845400 |
| H  | 3.752328  | -0.862257 | -3.162771 |
| H  | 4.918417  | -2.076670 | -2.538634 |
| C  | 5.080371  | -1.111993 | 0.082145  |
| H  | 5.492626  | -0.403713 | 0.829814  |
| H  | 4.238773  | -1.657856 | 0.550384  |
| H  | 5.869832  | -1.852247 | -0.164554 |
| C  | 5.852353  | 0.358637  | -1.798884 |
| H  | 5.98827   | 0.903522  | -2.731836 |
| H  | 6.306175  | 1.076418  | -1.084731 |
| H  | 6.632349  | -0.387613 | -2.052577 |
| C  | 3.150634  | 4.727937  | -2.336153 |
| H  | 3.341596  | 5.806709  | -2.514846 |
| H  | 4.030867  | 4.166795  | -2.710530 |
| H  | 2.272619  | 4.427406  | -2.944783 |
| C  | 4.142801  | 4.887806  | -0.007838 |
| H  | 5.053635  | 4.338404  | -0.321823 |
| H  | 4.345591  | 5.970551  | -0.143167 |
| H  | 3.988585  | 4.699382  | 1.075045  |
| C  | 1.700894  | 5.332535  | -0.377751 |
| H  | 0.780395  | 5.102981  | -0.954435 |
| H  | 1.480238  | 5.204546  | 0.702948  |
| H  | 1.929884  | 6.405057  | -0.541285 |
| C  | 1.269050  | -4.391094 | 0.400475  |
| C  | 0.294324  | -3.536426 | 1.253558  |
| H  | 1.028753  | -5.465017 | 0.580441  |
| H  | -0.711813 | -4.011902 | 1.295406  |
| H  | 0.653851  | -3.372182 | 2.295451  |
| C  | 2.738228  | -4.168084 | 0.823300  |
| H  | 2.837041  | -4.520310 | 1.873373  |
| H  | 2.943828  | -3.076536 | 0.850424  |
| C  | 1.002083  | -4.148441 | -1.109965 |
| H  | -0.059313 | -4.333128 | -1.373930 |

|  |   |           |           |           |
|--|---|-----------|-----------|-----------|
|  | H | 1.621705  | -4.812738 | -1.744096 |
|  | C | 0.515223  | 1.139033  | 2.932947  |
|  | C | -1.410103 | -0.753003 | 3.734356  |
|  | C | -0.721809 | -0.008326 | 4.714112  |
|  | C | 0.258033  | 0.948274  | 4.306213  |
|  | H | 1.274734  | 1.863972  | 2.603608  |
|  | H | -2.155225 | -1.505943 | 4.037901  |
|  | C | 1.016519  | 1.747839  | 5.336447  |
|  | H | 1.582016  | 1.084033  | 6.025019  |
|  | H | 1.737021  | 2.445027  | 4.867815  |
|  | H | 0.328062  | 2.343858  | 5.972884  |
|  | C | -1.010927 | -0.225878 | 6.178121  |
|  | H | -0.097680 | -0.541997 | 6.726232  |
|  | H | -1.356498 | 0.711768  | 6.663611  |
|  | H | -1.788112 | -0.997830 | 6.337411  |
|  | C | 3.788995  | -4.854198 | -0.054980 |
|  | H | 4.799420  | -4.752540 | 0.390378  |
|  | H | 3.583602  | -5.939701 | -0.172614 |
|  | H | 3.837498  | -4.404980 | -1.068774 |

### 3 (1-butene)

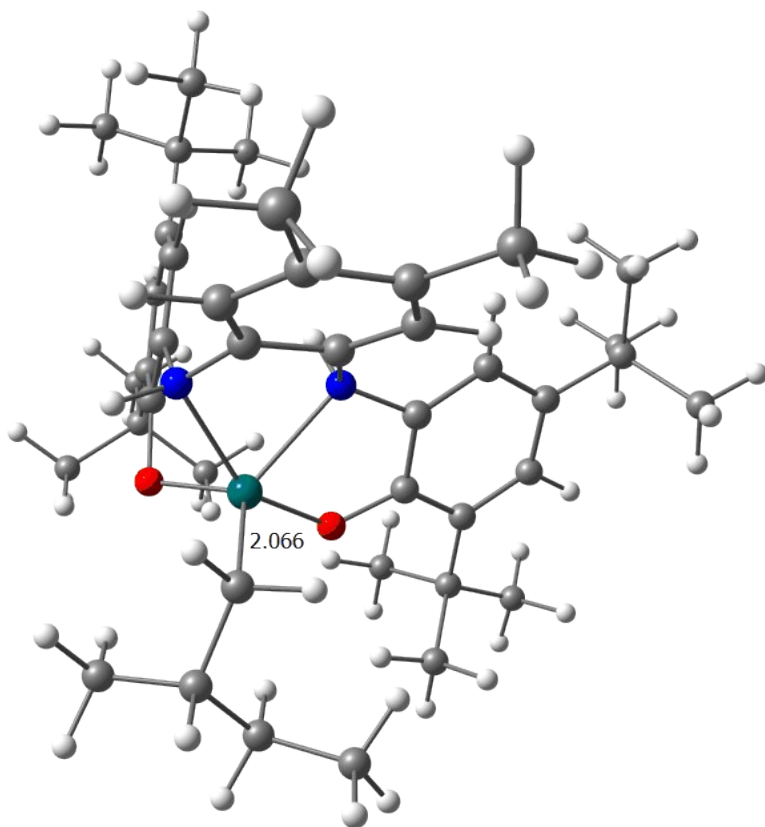

Zero-point correction= 0.910853 (Hartree/Particle)  
 Thermal correction to Energy= 0.982075  
 Thermal correction to Enthalpy= 0.983193  
 Thermal correction to Gibbs Free Energy= 0.800430  
 Sum of electronic and zero-point Energies= -1915.311662  
 Sum of electronic and thermal Energies= -1915.240441  
 Sum of electronic and thermal Enthalpies= -1915.239322  
 Sum of electronic and thermal Free Energies= -1915.422085

Solvent: -1915.9016739

107  
PhTi(Bu)CH<sub>3</sub>+buteneTS+POST90 SCF Done: -1916.22251532 A.U.

|    |           |           |           |
|----|-----------|-----------|-----------|
| Ti | -0.296339 | -0.989715 | 1.387534  |
| N  | 0.145903  | 0.864693  | 0.219687  |
| O  | 1.182045  | -1.477722 | 0.418784  |
| C  | 1.931456  | -0.630835 | -0.350318 |
| C  | 1.435559  | 0.687789  | -0.450981 |
| C  | 2.046015  | 1.656915  | -1.256594 |
| H  | 1.581196  | 2.646581  | -1.357550 |
| C  | 3.232192  | 1.329709  | -1.942339 |
| C  | 3.716574  | 0.005087  | -1.817795 |
| H  | 4.630845  | -0.254346 | -2.366674 |
| C  | 3.098386  | -1.014235 | -1.065895 |
| C  | -0.130933 | 1.949600  | 1.155023  |
| C  | 3.997649  | 2.347895  | -2.810495 |
| N  | -1.925836 | 0.448516  | 1.792879  |
| O  | -1.755766 | -2.087248 | 1.076895  |
| C  | -2.450705 | -1.296108 | 0.193672  |
| C  | -2.594935 | 0.076402  | 0.545158  |
| C  | -3.187326 | 1.012269  | -0.313575 |
| H  | -3.240264 | 2.061764  | 0.007731  |
| C  | -3.692282 | 0.580879  | -1.554457 |
| C  | -3.563279 | -0.795969 | -1.878106 |
| H  | -3.955560 | -1.127217 | -2.848265 |
| C  | -2.948843 | -1.760876 | -1.059953 |
| C  | -1.295746 | 1.744351  | 1.928398  |
| C  | -4.357847 | 1.542958  | -2.555999 |
| C  | 3.619648  | -2.464153 | -1.055327 |
| C  | -2.773952 | -3.229221 | -1.486301 |
| H  | -0.595352 | 0.884435  | -0.509626 |
| H  | -2.482202 | 0.193859  | 2.623798  |
| H  | -0.987067 | -3.460766 | 3.125407  |
| C  | -4.429261 | 2.984854  | -2.011868 |
| H  | -5.027328 | 3.047256  | -1.078855 |
| H  | -3.421531 | 3.406552  | -1.812900 |
| H  | -4.916707 | 3.643476  | -2.758625 |
| C  | -3.529699 | 1.550209  | -3.867990 |
| H  | -3.473373 | 0.544627  | -4.332013 |
| H  | -3.992699 | 2.234054  | -4.609254 |
| H  | -2.492022 | 1.898478  | -3.681592 |
| C  | -5.800202 | 1.053846  | -2.849677 |
| H  | -6.298257 | 1.743124  | -3.562539 |
| H  | -5.814587 | 0.041770  | -3.302780 |
| H  | -6.407466 | 1.020318  | -1.921759 |
| C  | -3.420529 | -3.507945 | -2.859601 |
| H  | -4.512324 | -3.308742 | -2.855122 |
| H  | -2.955918 | -2.911163 | -3.672026 |
| H  | -3.282856 | -4.576631 | -3.120023 |
| C  | -3.438786 | -4.155282 | -0.434164 |
| H  | -2.985473 | -4.032121 | 0.568147  |
| H  | -4.525684 | -3.945931 | -0.355754 |
| H  | -3.317489 | -5.215766 | -0.737430 |
| C  | -1.255650 | -3.538720 | -1.592462 |
| H  | -0.757776 | -2.853601 | -2.309795 |
| H  | -0.745043 | -3.446291 | -0.615311 |
| H  | -1.103616 | -4.576713 | -1.953236 |
| C  | 2.525122  | -3.387342 | -1.653762 |
| H  | 1.595772  | -3.357190 | -1.053594 |
| H  | 2.278764  | -3.088768 | -2.693827 |
| H  | 2.884236  | -4.437308 | -1.675198 |
| C  | 3.927683  | -2.893593 | 0.398722  |
| H  | 4.691287  | -2.233106 | 0.858187  |
| H  | 3.018039  | -2.859740 | 1.024460  |
| H  | 4.316695  | -3.932797 | 0.416744  |
| C  | 4.904740  | -2.622516 | -1.894608 |
| H  | 4.743268  | -2.371547 | -2.963517 |
| H  | 5.735359  | -1.996411 | -1.507512 |
| H  | 5.241848  | -3.678088 | -1.853142 |
| C  | 4.140201  | 1.796183  | -4.252403 |
| H  | 4.680899  | 2.525571  | -4.890543 |
| H  | 4.711050  | 0.845845  | -4.281325 |
| H  | 3.145853  | 1.609473  | -4.708306 |
| C  | 5.403947  | 2.568206  | -2.194320 |
| H  | 5.989792  | 1.627385  | -2.153286 |
| H  | 5.981096  | 3.296184  | -2.801820 |
| H  | 5.328114  | 2.964928  | -1.160491 |
| C  | 3.273088  | 3.708273  | -2.877938 |
| H  | 2.262147  | 3.618314  | -3.328296 |
| H  | 3.171746  | 4.176057  | -1.875963 |
| H  | 3.851884  | 4.412658  | -3.509038 |
| C  | 0.558471  | -2.236281 | 4.115988  |
| C  | 0.352695  | -0.914245 | 3.347521  |
| H  | 0.795272  | -1.962458 | 5.173204  |
| H  | -0.382869 | -0.265336 | 3.880093  |
| H  | 1.295270  | -0.320564 | 3.254009  |
| C  | 1.754147  | -3.058107 | 3.589231  |
| H  | 1.774916  | -4.025715 | 4.136567  |
| H  | 1.572102  | -3.322050 | 2.520197  |
| C  | -0.733474 | -3.074735 | 4.137064  |
| H  | -1.601589 | -2.479659 | 4.492170  |

|  |   |           |           |          |
|--|---|-----------|-----------|----------|
|  | H | -0.628937 | -3.951154 | 4.808626 |
|  | C | 0.650529  | 3.089331  | 1.366159 |
|  | C | -1.692117 | 2.700593  | 2.868550 |
|  | C | -0.921833 | 3.865186  | 3.080228 |
|  | C | 0.273153  | 4.053139  | 2.328500 |
|  | H | 1.580531  | 3.223640  | 0.796712 |
|  | H | -2.601125 | 2.528393  | 3.467264 |
|  | C | 1.132883  | 5.271671  | 2.557043 |
|  | H | 1.473582  | 5.331938  | 3.612804 |
|  | H | 2.030801  | 5.272739  | 1.909667 |
|  | H | 0.567840  | 6.207374  | 2.357764 |
|  | C | -1.352347 | 4.887664  | 4.102243 |
|  | H | -0.580616 | 5.020282  | 4.890592 |
|  | H | -1.496378 | 5.886011  | 3.636547 |
|  | H | -2.300254 | 4.604297  | 4.598622 |
|  | C | 3.112463  | -2.363019 | 3.733660 |
|  | H | 3.942698  | -3.032289 | 3.431621 |
|  | H | 3.184359  | -1.454671 | 3.099425 |
|  | H | 3.292753  | -2.057201 | 4.786104 |

**4 (isomer) (1-butene)**

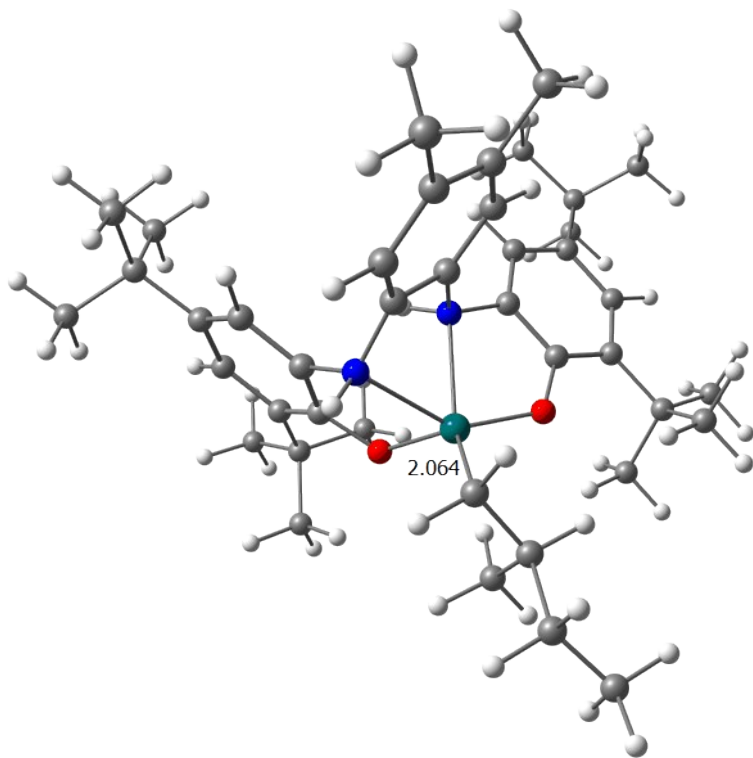

Zero-point correction= 0.910022 (Hartree/Particle)  
 Thermal correction to Energy= 0.981705  
 Thermal correction to Enthalpy= 0.982823  
 Thermal correction to Gibbs Free Energy= 0.797039  
 Sum of electronic and zero-point Energies= -1915.310226  
 Sum of electronic and thermal Energies= -1915.238544  
 Sum of electronic and thermal Enthalpies= -1915.237425  
 Sum of electronic and thermal Free Energies= -1915.423210

Solvent: -1915.901217

107

PhTitBuCH3+buteneTSisomer+POST SCF Done: -  
1916.22024870 A.U.

|    |           |           |           |
|----|-----------|-----------|-----------|
| Ti | -0.223842 | 1.676814  | 0.155270  |
| N  | -0.107494 | -0.551356 | 0.482588  |
| O  | -1.952443 | 1.116981  | -0.145498 |
| C  | -2.325889 | -0.181769 | -0.338105 |
| C  | -1.341800 | -1.138171 | -0.024024 |
| C  | -1.549629 | -2.511036 | -0.199492 |
| H  | -0.740884 | -3.212418 | 0.049646  |
| C  | -2.792251 | -2.954483 | -0.696415 |
| C  | -3.772411 | -1.973245 | -0.987731 |
| H  | -4.739898 | -2.320157 | -1.373670 |
| C  | -3.592418 | -0.583235 | -0.832132 |
| C  | 0.118238  | -0.546377 | 1.920091  |
| C  | -3.104385 | -4.444891 | -0.940843 |
| N  | 1.644744  | 1.226622  | 1.321862  |
| O  | 1.049300  | 1.608846  | -1.178083 |
| C  | 2.217055  | 0.918535  | -0.999865 |
| C  | 2.575612  | 0.650220  | 0.341187  |
| C  | 3.703145  | -0.105224 | 0.680927  |
| H  | 3.917623  | -0.294562 | 1.742200  |
| C  | 4.523144  | -0.605845 | -0.350080 |
| C  | 4.148953  | -0.318958 | -1.687587 |
| H  | 4.784286  | -0.718480 | -2.489013 |
| C  | 3.009985  | 0.420729  | -2.066428 |
| C  | 1.084469  | 0.386360  | 2.356464  |
| C  | 5.786962  | -1.445174 | -0.073862 |
| C  | -4.675030 | 0.454826  | -1.184208 |
| C  | 2.597882  | 0.646260  | -3.533107 |
| H  | 0.724828  | -0.922128 | -0.013892 |
| H  | 2.032857  | 2.092926  | 1.724772  |
| H  | -0.979032 | 3.083680  | -1.486161 |
| C  | 6.009028  | -1.674020 | 1.435592  |
| H  | 6.154460  | -0.719690 | 1.983615  |
| H  | 5.163390  | -2.222502 | 1.901417  |
| H  | 6.921643  | -2.283876 | 1.592493  |
| C  | 5.641860  | -2.826978 | -0.762712 |
| H  | 5.528405  | -2.735524 | -1.862121 |
| H  | 6.542506  | -3.447087 | -0.572874 |
| H  | 4.759054  | -3.375481 | -0.372924 |
| C  | 7.021962  | -0.702966 | -0.647184 |
| H  | 7.944756  | -1.290163 | -0.458596 |
| H  | 6.943148  | -0.549681 | -1.742811 |
| H  | 7.144442  | 0.292897  | -0.173222 |
| C  | 3.618370  | 0.037117  | -4.517291 |
| H  | 4.625738  | 0.488956  | -4.404821 |
| H  | 3.711290  | -1.062373 | -4.397818 |
| H  | 3.286045  | 0.226906  | -5.557968 |
| C  | 2.497405  | 2.168175  | -3.814788 |
| H  | 1.747023  | 2.657427  | -3.163873 |
| H  | 3.476710  | 2.664050  | -3.652014 |
| H  | 2.199820  | 2.339330  | -4.870292 |
| C  | 1.222648  | -0.035646 | -3.772471 |
| H  | 1.287257  | -1.128111 | -3.585529 |
| H  | 0.434226  | 0.384925  | -3.117559 |
| H  | 0.903594  | 0.109900  | -4.825345 |
| C  | -4.137539 | 1.397598  | -2.293555 |
| H  | -3.234722 | 1.945504  | -1.959990 |
| H  | -3.880333 | 0.826392  | -3.209426 |
| H  | -4.911631 | 2.145970  | -2.562781 |
| C  | -5.022854 | 1.277361  | 0.084765  |
| H  | -5.420162 | 0.619674  | 0.885426  |
| H  | -4.135805 | 1.810018  | 0.480736  |
| H  | -5.799957 | 2.033333  | -0.153539 |
| C  | -5.966515 | -0.213836 | -1.699313 |
| H  | -5.793282 | -0.796138 | -2.628011 |
| H  | -6.417620 | -0.887524 | -0.941582 |
| H  | -6.718107 | 0.566422  | -1.936042 |
| C  | -3.386564 | -4.658366 | -2.450751 |
| H  | -3.609304 | -5.726544 | -2.654761 |
| H  | -4.256299 | -4.064115 | -2.797696 |
| H  | -2.509250 | -4.365580 | -3.064148 |
| C  | -4.351391 | -4.850628 | -0.113615 |
| H  | -5.250571 | -4.268462 | -0.400910 |
| H  | -4.586468 | -5.923442 | -0.273633 |
| H  | -4.177770 | -4.694508 | 0.971447  |
| C  | -1.928858 | -5.355345 | -0.529591 |
| H  | -1.010336 | -5.137696 | -1.113943 |
| H  | -1.689261 | -5.261301 | 0.550575  |
| H  | -2.191269 | -6.416316 | -0.716322 |
| C  | -1.429545 | 4.124742  | 0.476042  |
| C  | -0.371569 | 3.374404  | 1.320089  |
| H  | -2.406050 | 3.597792  | 0.575690  |
| H  | 0.571174  | 3.966080  | 1.379094  |
| H  | -0.722985 | 3.140386  | 2.350970  |
| C  | -1.629944 | 5.573279  | 0.991762  |
| H  | -1.809032 | 5.517619  | 2.087711  |
| H  | -0.671900 | 6.127581  | 0.866141  |
| C  | -1.030843 | 4.101944  | -1.020343 |
| H  | -0.045963 | 4.586118  | -1.184671 |

|  |   |           |           |           |
|--|---|-----------|-----------|-----------|
|  | H | -1.786783 | 4.613299  | -1.648164 |
|  | C | -0.585119 | -1.316558 | 2.854266  |
|  | C | 1.357134  | 0.525941  | 3.723889  |
|  | C | 0.662944  | -0.248338 | 4.676124  |
|  | C | -0.325435 | -1.180050 | 4.233579  |
|  | H | -1.352667 | -2.020595 | 2.499583  |
|  | H | 2.109535  | 1.260291  | 4.053994  |
|  | C | -1.089663 | -2.010367 | 5.234819  |
|  | H | -1.651335 | -1.367185 | 5.945739  |
|  | H | -1.814191 | -2.686725 | 4.742374  |
|  | H | -0.404904 | -2.631780 | 5.850543  |
|  | C | 0.954762  | -0.088749 | 6.147127  |
|  | H | 0.045512  | 0.218752  | 6.706774  |
|  | H | 1.287555  | -1.048323 | 6.597444  |
|  | H | 1.741972  | 0.666522  | 6.334584  |
|  | C | -2.779775 | 6.336531  | 0.322292  |
|  | H | -2.596344 | 6.516896  | -0.757168 |
|  | H | -3.738651 | 5.783410  | 0.414632  |
|  | H | -2.919969 | 7.329429  | 0.796111  |

### 4 (1-butene)

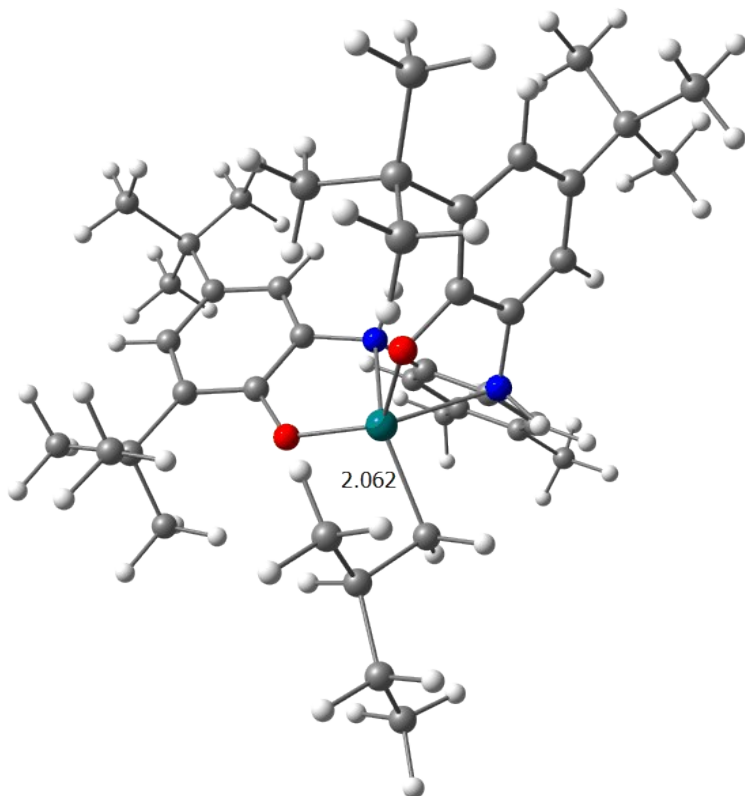

Zero-point correction= 0.910151 (Hartree/Particle)  
 Thermal correction to Energy= 0.981741  
 Thermal correction to Enthalpy= 0.982860  
 Thermal correction to Gibbs Free Energy= 0.797874  
 Sum of electronic and zero-point Energies= -1915.310760  
 Sum of electronic and thermal Energies= -1915.239170  
 Sum of electronic and thermal Enthalpies= -1915.238051  
 Sum of electronic and thermal Free Energies= -1915.423038

Solvent: -1915.9021278

107  
 PhTitBuCH3+buteneTS90isomer+POST SCF Done: -  
 1916.22091104 A.U.

|    |           |           |           |
|----|-----------|-----------|-----------|
| Ti | -0.172494 | 1.687416  | -0.231010 |
| N  | -0.166409 | -0.442913 | 0.505969  |
| O  | -1.906718 | 1.143163  | -0.514242 |
| C  | -2.345382 | -0.147642 | -0.442500 |
| C  | -1.418751 | -1.063908 | 0.089083  |
| C  | -1.695026 | -2.432228 | 0.190467  |
| H  | -0.928926 | -3.105473 | 0.599964  |
| C  | -2.951237 | -2.907994 | -0.237586 |
| C  | -3.874602 | -1.961821 | -0.748375 |
| H  | -4.853147 | -2.334224 | -1.079203 |
| C  | -3.623757 | -0.580160 | -0.876077 |
| C  | 0.050325  | -0.207029 | 1.927372  |
| C  | -3.340958 | -4.398736 | -0.172472 |
| N  | 1.640403  | 1.387155  | 1.058265  |
| O  | 1.136731  | 1.366769  | -1.490335 |
| C  | 2.266934  | 0.669371  | -1.157114 |
| C  | 2.573088  | 0.618197  | 0.221736  |
| C  | 3.651444  | -0.114974 | 0.727331  |
| H  | 3.822828  | -0.129875 | 1.812869  |
| C  | 4.476563  | -0.819378 | -0.171964 |
| C  | 4.157604  | -0.747952 | -1.551926 |
| H  | 4.796155  | -1.305407 | -2.249997 |
| C  | 3.069789  | -0.032556 | -2.093868 |
| C  | 1.043842  | 0.753545  | 2.213338  |
| C  | 5.685393  | -1.656249 | 0.292693  |
| C  | -4.644899 | 0.416243  | -1.456332 |
| C  | 2.722346  | -0.032655 | -3.594364 |
| H  | 0.653881  | -0.927415 | 0.093505  |
| H  | 2.050391  | 2.298993  | 1.312032  |
| H  | -0.867823 | 2.840088  | -2.130685 |
| C  | 5.858275  | -1.617319 | 1.825214  |
| H  | 6.039581  | -0.586941 | 2.196638  |
| H  | 4.974034  | -2.031350 | 2.354029  |
| H  | 6.733624  | -2.230368 | 2.120632  |
| C  | 5.478468  | -3.131102 | -0.140284 |
| H  | 5.396572  | -3.235229 | -1.241412 |
| H  | 6.337515  | -3.752165 | 0.188609  |
| H  | 4.556557  | -3.553380 | 0.311441  |
| C  | 6.973719  | -1.095220 | -0.363012 |
| H  | 7.857267  | -1.684173 | -0.039911 |
| H  | 6.930908  | -1.140455 | -1.470261 |
| H  | 7.140177  | -0.037214 | -0.072728 |
| C  | 3.746924  | -0.837404 | -4.420970 |
| H  | 4.771385  | -0.420055 | -4.332812 |
| H  | 3.776454  | -1.906833 | -4.125627 |
| C  | 3.466946  | -0.801171 | -5.493203 |
| C  | 2.708115  | 1.426428  | -4.121168 |
| H  | 1.959713  | 2.047161  | -3.590894 |
| H  | 3.704314  | 1.899809  | -3.998702 |
| C  | 2.457368  | 1.436330  | -5.202291 |
| C  | 1.324422  | -0.682886 | -3.782934 |
| H  | 1.323275  | -1.728815 | -3.410619 |
| H  | 0.533326  | -0.119906 | -3.249646 |
| H  | 1.057839  | -0.705769 | -4.859973 |
| C  | -4.044892 | 1.083734  | -2.722489 |
| H  | -3.125399 | 1.654565  | -2.486642 |
| H  | -3.795179 | 0.322870  | -3.490651 |
| H  | -4.779630 | 1.788301  | -3.164904 |
| C  | -4.963271 | 1.497209  | -0.389826 |
| H  | -5.399641 | 1.038498  | 0.521469  |
| H  | -4.054176 | 2.057419  | -0.094526 |
| H  | -5.698870 | 2.224485  | -0.792544 |
| C  | -5.964169 | -0.279152 | -1.852574 |
| H  | -5.812329 | -1.044937 | -2.641291 |
| H  | -6.456464 | -0.763215 | -0.983691 |
| H  | -6.672483 | 0.473023  | -2.255141 |
| C  | -3.647879 | -4.904903 | -1.605925 |
| H  | -3.928290 | -5.978656 | -1.583399 |
| H  | -4.488527 | -4.350759 | -2.071113 |
| H  | -2.762047 | -4.792956 | -2.264938 |
| C  | -4.599972 | -4.557649 | 0.718449  |
| H  | -5.467807 | -3.995294 | 0.317679  |
| H  | -4.895953 | -5.625599 | 0.780162  |
| H  | -4.407120 | -4.194088 | 1.749300  |
| C  | -2.210476 | -5.265551 | 0.419979  |
| H  | -1.287564 | -5.221940 | -0.195488 |
| H  | -1.956026 | -4.964093 | 1.457993  |
| H  | -2.529790 | -6.326773 | 0.456337  |
| C  | -1.297924 | 4.209785  | -0.378969 |
| C  | -0.316699 | 3.557760  | 0.625477  |
| H  | -2.304295 | 3.754225  | -0.235123 |
| H  | 0.642151  | 4.125287  | 0.658164  |
| H  | -0.728297 | 3.474849  | 1.656955  |
| C  | -1.441430 | 5.735952  | -0.159233 |
| H  | -0.454338 | 6.215610  | -0.351184 |
| H  | -2.130653 | 6.128646  | -0.940740 |
| C  | -0.847249 | 3.919493  | -1.831592 |
| H  | 0.179670  | 4.295266  | -2.020207 |



|  |   |           |           |           |
|--|---|-----------|-----------|-----------|
|  | H | -1.533720 | 4.394285  | -2.561859 |
|  | C | -0.678109 | -0.793599 | 2.969178  |
|  | C | 1.319614  | 1.104725  | 3.541247  |
|  | C | 0.602265  | 0.514672  | 4.602430  |
|  | C | -0.414628 | -0.444570 | 4.310299  |
|  | H | -1.467411 | -1.521884 | 2.730168  |
|  | H | 2.094956  | 1.858493  | 3.753226  |
|  | C | -1.203143 | -1.080760 | 5.427790  |
|  | H | -1.723172 | -0.314620 | 6.041701  |
|  | H | -1.965694 | -1.786112 | 5.045709  |
|  | H | -0.539005 | -1.638513 | 6.122416  |
|  | C | 0.901342  | 0.898131  | 6.030190  |
|  | H | 0.002268  | 1.314879  | 6.532426  |
|  | H | 1.210078  | 0.013798  | 6.627615  |
|  | H | 1.708844  | 1.652292  | 6.096900  |
|  | C | -1.958653 | 6.127073  | 1.228087  |
|  | H | -2.931498 | 5.637384  | 1.447937  |
|  | H | -1.247897 | 5.840500  | 2.031029  |
|  | H | -2.112309 | 7.222790  | 1.300843  |

**6-7 (isomer) (1-butene)**

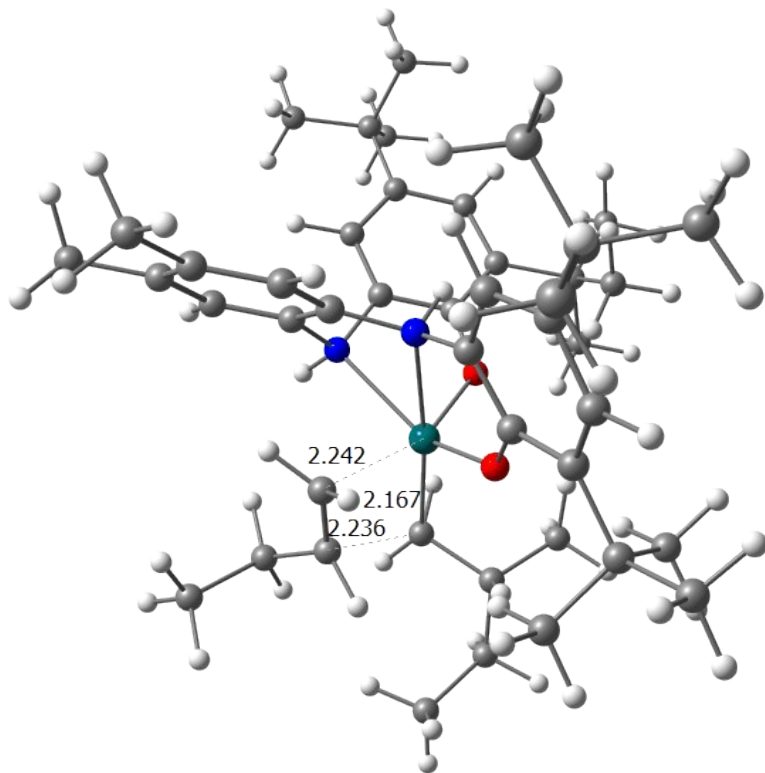

Zero-point correction= 1.019349 (Hartree/Particle)  
 Thermal correction to Energy= 1.097511  
 Thermal correction to Enthalpy= 1.098630  
 Thermal correction to Gibbs Free Energy= 0.901692  
 Sum of electronic and zero-point Energies= -2072.314845  
 Sum of electronic and thermal Energies= -2072.236683  
 Sum of electronic and thermal Enthalpies= -2072.235565  
 Sum of electronic and thermal Free Energies= -2072.432502

Solvent: -2072.9752228

119

PhTi(Bu)CH<sub>3</sub>+buteneTS2+isomerBISreal90 SCF Done: -2073.33419430 A.U.

|    |           |           |           |
|----|-----------|-----------|-----------|
| Ti | 0.331492  | -1.428834 | 0.451608  |
| N  | 0.075685  | 0.891818  | 0.210915  |
| O  | 1.877084  | -0.890474 | -0.334326 |
| C  | 2.289549  | 0.386433  | -0.571882 |
| C  | 1.337402  | 1.397020  | -0.315941 |
| C  | 1.599658  | 2.735253  | -0.641452 |
| H  | 0.808438  | 3.483668  | -0.505920 |
| C  | 2.863136  | 3.093789  | -1.151543 |
| C  | 3.822307  | 2.065666  | -1.322518 |
| H  | 4.813734  | 2.348914  | -1.699483 |
| C  | 3.584768  | 0.703159  | -1.058502 |
| C  | -0.527274 | 1.430840  | 1.417020  |
| C  | 3.227413  | 4.546814  | -1.517168 |
| N  | -1.733919 | -0.680443 | 1.338635  |
| O  | -0.875611 | -1.564156 | -0.965247 |
| C  | -2.123018 | -1.044521 | -1.029169 |
| C  | -2.652635 | -0.570349 | 0.187285  |
| C  | -3.924038 | 0.010919  | 0.268915  |
| H  | -4.276521 | 0.389518  | 1.238021  |
| C  | -4.708161 | 0.117336  | -0.895603 |
| C  | -4.150812 | -0.355612 | -2.111493 |
| H  | -4.756489 | -0.254838 | -3.021961 |
| C  | -2.872471 | -0.931621 | -2.233660 |
| C  | -1.505425 | 0.596791  | 1.997991  |
| C  | -6.119259 | 0.739332  | -0.892625 |
| C  | 4.646006  | -0.395387 | -1.260338 |
| C  | -2.273445 | -1.392128 | -3.575549 |
| H  | -0.638997 | 0.898705  | -0.542268 |
| H  | -2.117698 | -1.351249 | 2.024392  |
| H  | 1.110528  | -3.093745 | -1.852522 |
| C  | -6.545820 | 1.194664  | 0.518359  |
| H  | -6.577703 | 0.347079  | 1.234712  |
| H  | -5.868456 | 1.974287  | 0.925913  |
| H  | -7.564525 | 1.631100  | 0.481688  |
| C  | -6.131658 | 1.973530  | -1.831747 |
| H  | -5.883003 | 1.703050  | -2.878207 |
| H  | -7.138104 | 2.441511  | -1.839730 |
| H  | -5.399476 | 2.736555  | -1.494690 |
| C  | -7.139239 | -0.312783 | -1.399647 |
| H  | -8.163165 | 0.115748  | -1.406879 |
| H  | -6.911947 | -0.648103 | -2.432196 |
| H  | -7.145512 | -1.209171 | -0.745436 |
| C  | -3.245272 | -1.152366 | -4.749599 |
| H  | -4.192986 | -1.716371 | -4.626497 |
| H  | -3.491183 | -0.077396 | -4.875091 |
| H  | -2.777203 | -1.496018 | -5.694285 |
| C  | -1.956010 | -2.909136 | -3.504366 |
| H  | -1.230358 | -3.136202 | -2.699418 |
| H  | -2.879062 | -3.496929 | -3.320085 |
| H  | -1.518884 | -3.251924 | -4.465469 |
| C  | -0.971210 | -0.590212 | -3.848742 |
| H  | -1.181415 | 0.499077  | -3.892751 |
| H  | -0.206427 | -0.770072 | -3.067682 |
| H  | -0.537327 | -0.891326 | -4.824801 |
| C  | 4.140049  | -1.412400 | -2.316298 |
| C  | 3.190282  | -1.886144 | -2.006060 |
| H  | 3.973687  | -0.914396 | -3.293670 |
| H  | 4.892808  | -2.214676 | -2.465150 |
| C  | 4.895844  | -1.108762 | 0.095870  |
| H  | 5.281291  | -0.394656 | 0.852729  |
| H  | 3.968557  | -1.566553 | 0.494506  |
| H  | 5.647556  | -1.915899 | -0.028198 |
| C  | 5.989059  | 0.185073  | -1.751294 |
| H  | 5.889978  | 0.685243  | -2.736773 |
| H  | 6.418634  | 0.911313  | -1.030496 |
| H  | 6.724717  | -0.635946 | -1.871682 |
| C  | 3.610085  | 4.612568  | -3.018659 |
| H  | 3.873235  | 5.652590  | -3.303432 |
| H  | 4.484803  | 3.972095  | -3.252954 |
| H  | 2.766299  | 4.282095  | -3.659153 |
| C  | 4.431967  | 5.000023  | -0.651719 |
| H  | 5.327779  | 4.368484  | -0.821877 |
| H  | 4.710866  | 6.045889  | -0.897541 |
| H  | 4.185426  | 4.954027  | 0.429507  |
| C  | 2.054489  | 5.518090  | -1.268386 |
| H  | 1.165184  | 5.262665  | -1.881851 |
| H  | 1.750487  | 5.537909  | -0.200470 |
| H  | 2.355926  | 6.549653  | -1.541602 |
| C  | 1.894396  | -3.966417 | 0.028005  |
| C  | 0.705073  | -3.510412 | 0.925087  |
| H  | 2.710698  | -3.212553 | 0.103770  |
| H  | -0.262490 | -3.474656 | 0.342895  |
| H  | 0.485497  | -4.246736 | 1.714319  |
| C  | 2.482323  | -5.310844 | 0.520141  |
| H  | 1.685336  | -6.087900 | 0.479170  |
| H  | 3.251256  | -5.626690 | -0.218827 |
| C  | 1.482076  | -4.060531 | -1.454649 |
| H  | 0.674565  | -4.810723 | -1.593696 |

|  |   |           |           |           |
|--|---|-----------|-----------|-----------|
|  | H | 2.342790  | -4.368423 | -2.081887 |
|  | C | -0.150542 | 2.602225  | 2.081798  |
|  | C | -2.124188 | 0.959811  | 3.197908  |
|  | C | -1.770089 | 2.153026  | 3.865769  |
|  | C | -0.759596 | 2.978572  | 3.301389  |
|  | H | 0.651507  | 3.228944  | 1.668985  |
|  | H | -2.879705 | 0.289886  | 3.640871  |
|  | C | -0.335326 | 4.248634  | 3.998293  |
|  | H | 0.040354  | 4.042898  | 5.023583  |
|  | H | 0.463723  | 4.777731  | 3.443969  |
|  | H | -1.189820 | 4.949465  | 4.114259  |
|  | C | -2.442304 | 2.534742  | 5.161787  |
|  | H | -1.705009 | 2.641285  | 5.986201  |
|  | H | -2.956053 | 3.516197  | 5.075050  |
|  | H | -3.195634 | 1.785573  | 5.473664  |
|  | C | 1.130095  | -0.865264 | 2.468918  |
|  | C | 1.284685  | -2.254240 | 2.682348  |
|  | H | 0.391912  | -0.333639 | 3.089793  |
|  | H | 1.999163  | -0.261536 | 2.154737  |
|  | H | 2.279203  | -2.698880 | 2.506631  |
|  | C | 0.449938  | -2.915514 | 3.766465  |
|  | H | 0.449316  | -4.019309 | 3.653210  |
|  | H | -0.608963 | -2.585760 | 3.666698  |
|  | C | 0.983121  | -2.549004 | 5.163951  |
|  | H | 0.391036  | -3.057266 | 5.951692  |
|  | H | 2.041139  | -2.862910 | 5.280459  |
|  | H | 0.933228  | -1.455943 | 5.343018  |
|  | C | 3.117150  | -5.275564 | 1.914350  |
|  | H | 2.375465  | -5.059416 | 2.713158  |
|  | H | 3.579258  | -6.251013 | 2.168001  |
|  | H | 3.914687  | -4.503904 | 1.974840  |

### 6-7 (1-butene)

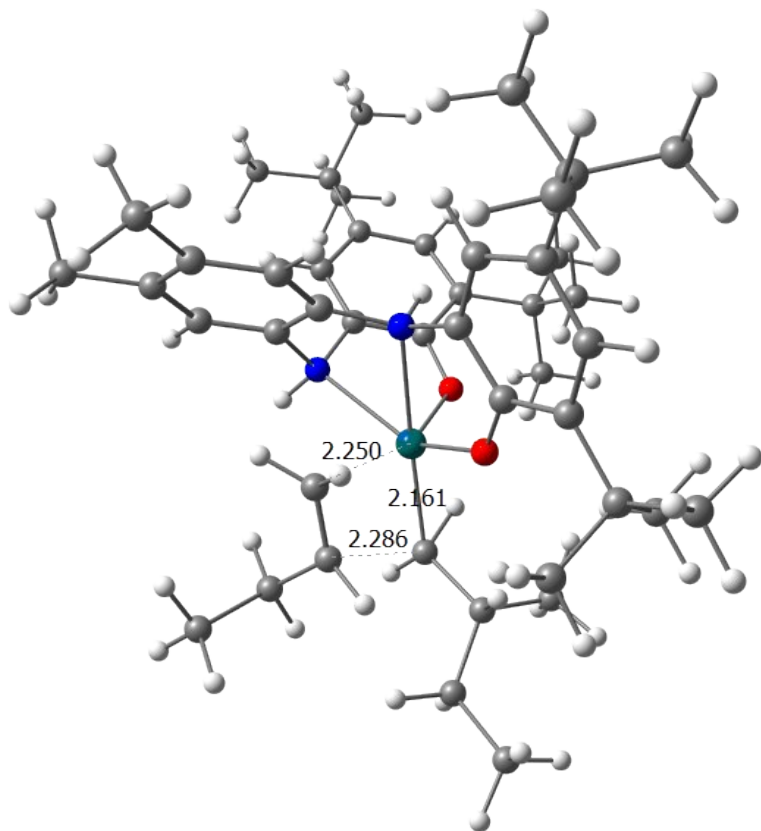

Zero-point correction= 1.018731 (Hartree/Particle)  
 Thermal correction to Energy= 1.097241  
 Thermal correction to Enthalpy= 1.098360  
 Thermal correction to Gibbs Free Energy= 0.899354  
 Sum of electronic and zero-point Energies= -2072.314883  
 Sum of electronic and thermal Energies= -2072.236373  
 Sum of electronic and thermal Enthalpies= -2072.235255  
 Sum of electronic and thermal Free Energies= -2072.434261

Solvent: -2072.9765152

119

PhTitBuCH3+buteneTS2+isomerBISreal SCF Done: -2073.33361472 A.U.

|    |           |           |           |
|----|-----------|-----------|-----------|
| Ti | 0.424352  | -1.411292 | 0.370731  |
| N  | -0.099233 | 0.884772  | 0.255036  |
| O  | 1.901136  | -0.641805 | -0.357637 |
| C  | 2.151277  | 0.684174  | -0.555690 |
| C  | 1.081607  | 1.557888  | -0.262242 |
| C  | 1.169616  | 2.929327  | -0.540094 |
| H  | 0.290885  | 3.565188  | -0.369752 |
| C  | 2.371944  | 3.462946  | -1.044123 |
| C  | 3.451436  | 2.570394  | -1.255331 |
| H  | 4.395824  | 2.989050  | -1.627252 |
| C  | 3.391773  | 1.180574  | -1.035500 |
| C  | -0.722834 | 1.285617  | 1.503048  |
| C  | 2.547333  | 4.963309  | -1.353188 |
| N  | -1.711306 | -0.928425 | 1.321340  |
| O  | -0.803091 | -1.613964 | -1.025284 |
| C  | -2.094816 | -1.213112 | -1.053872 |
| C  | -2.651328 | -0.848493 | 0.187454  |
| C  | -3.971726 | -0.397579 | 0.308293  |
| H  | -4.345987 | -0.101417 | 1.297678  |
| C  | -4.777602 | -0.313620 | -0.842965 |
| C  | -4.193169 | -0.673885 | -2.084711 |
| H  | -4.817331 | -0.590070 | -2.984469 |
| C  | -2.866874 | -1.116767 | -2.245618 |
| C  | -1.601839 | 0.326928  | 2.049273  |
| C  | -6.241669 | 0.168736  | -0.797266 |
| C  | 4.590436  | 0.240251  | -1.264274 |
| C  | -2.244337 | -1.449566 | -3.614249 |
| H  | -0.829383 | 0.849595  | -0.482106 |
| H  | -2.015379 | -1.672094 | 1.970950  |
| H  | 2.170204  | -3.477398 | -2.064288 |
| C  | -6.693638 | 0.506072  | 0.638885  |
| H  | -6.638883 | -0.377513 | 1.308851  |
| H  | -6.087905 | 1.323084  | 1.084208  |
| H  | -7.748701 | 0.847176  | 0.630341  |
| C  | -6.383371 | 1.443968  | -1.668131 |
| H  | -6.119059 | 1.254800  | -2.728578 |
| H  | -7.430643 | 1.811571  | -1.646594 |
| H  | -5.725970 | 2.256011  | -1.293370 |
| C  | -7.163364 | -0.948049 | -1.351924 |
| H  | -8.224021 | -0.622095 | -1.321679 |
| H  | -6.923723 | -1.200708 | -2.404794 |
| H  | -7.070747 | -1.875750 | -0.750096 |
| C  | -3.257110 | -1.266953 | -4.763791 |
| H  | -4.134999 | -1.936621 | -4.653196 |
| H  | -3.620856 | -0.221018 | -4.836965 |
| H  | -2.771783 | -1.515439 | -5.729341 |
| C  | -1.760862 | -2.923867 | -3.619616 |
| H  | -0.988737 | -3.103213 | -2.845973 |
| H  | -2.608050 | -3.616580 | -3.435535 |
| H  | -1.321868 | -3.176855 | -4.607269 |
| C  | -1.044113 | -0.495313 | -3.864356 |
| H  | -1.376426 | 0.564142  | -3.864585 |
| H  | -0.256038 | -0.616330 | -3.094845 |
| H  | -0.588220 | -0.706793 | -4.854048 |
| C  | 4.219613  | -0.829274 | -2.324254 |
| H  | 3.349090  | -1.435231 | -2.011592 |
| H  | 3.975317  | -0.351123 | -3.295153 |
| H  | 5.075038  | -1.517573 | -2.487783 |
| C  | 4.949976  | -0.437793 | 0.085169  |
| H  | 5.258434  | 0.317795  | 0.836814  |
| H  | 4.091038  | -1.002632 | 0.499550  |
| H  | 5.790769  | -1.149385 | -0.052343 |
| C  | 5.834819  | 1.002656  | -1.765206 |
| H  | 5.653214  | 1.496453  | -2.742136 |
| H  | 6.174834  | 1.771771  | -1.041109 |
| H  | 6.672887  | 0.290304  | -1.906668 |
| C  | 2.927234  | 5.136533  | -2.846459 |
| H  | 3.056047  | 6.212027  | -3.088803 |
| H  | 3.878702  | 4.624162  | -3.095835 |
| H  | 2.136577  | 4.726083  | -3.508166 |
| C  | 3.676589  | 5.534157  | -0.456525 |
| H  | 4.647925  | 5.031422  | -0.640164 |
| H  | 3.818320  | 6.616559  | -0.657753 |
| H  | 3.430148  | 5.412878  | 0.618912  |
| C  | 1.256953  | 5.764426  | -1.082156 |
| H  | 0.411768  | 5.416067  | -1.711997 |
| H  | 0.947656  | 5.708245  | -0.017029 |
| H  | 1.422459  | 6.835237  | -1.317563 |
| C  | 2.690741  | -3.726376 | 0.061194  |
| C  | 1.258008  | -3.398988 | 0.525194  |
| H  | 3.272219  | -2.777008 | 0.070764  |
| H  | 0.628161  | -3.233511 | -0.406995 |
| H  | 0.755305  | -4.254804 | 1.020148  |
| C  | 3.395900  | -4.732858 | 0.997725  |
| H  | 3.278852  | -4.405374 | 2.053974  |
| H  | 2.868668  | -5.712196 | 0.929211  |
| C  | 2.659841  | -4.220525 | -1.400624 |
| H  | 2.102842  | -5.177979 | -1.486583 |

|  |   |           |           |           |
|--|---|-----------|-----------|-----------|
|  | H | 3.683627  | -4.384429 | -1.791978 |
|  | C | -0.448287 | 2.449443  | 2.229200  |
|  | C | -2.232983 | 0.561738  | 3.275146  |
|  | C | -1.984680 | 1.745291  | 4.004446  |
|  | C | -1.067662 | 2.694829  | 3.476149  |
|  | H | 0.279548  | 3.175435  | 1.841240  |
|  | H | -2.911246 | -0.202365 | 3.689773  |
|  | C | -0.754708 | 3.959109  | 4.239304  |
|  | H | -0.350881 | 3.733914  | 5.249638  |
|  | H | -0.013960 | 4.588885  | 3.709824  |
|  | H | -1.668638 | 4.570990  | 4.398163  |
|  | C | -2.668462 | 1.988686  | 5.327497  |
|  | H | -1.931122 | 2.118070  | 6.148626  |
|  | H | -3.273188 | 2.920561  | 5.302685  |
|  | H | -3.343366 | 1.155775  | 5.604901  |
|  | C | 1.111976  | -0.943803 | 2.461329  |
|  | C | 1.565025  | -2.276637 | 2.492972  |
|  | H | 0.273687  | -0.661963 | 3.118255  |
|  | H | 1.823524  | -0.131083 | 2.232508  |
|  | H | 2.629343  | -2.454316 | 2.265778  |
|  | C | 0.913518  | -3.275928 | 3.429912  |
|  | H | 1.146608  | -4.315263 | 3.121866  |
|  | H | -0.193136 | -3.167104 | 3.375499  |
|  | C | 4.891500  | -4.913320 | 0.707360  |
|  | H | 5.364060  | -5.585503 | 1.451818  |
|  | H | 5.073249  | -5.354507 | -0.293614 |
|  | H | 5.424906  | -3.939394 | 0.746218  |
|  | C | 1.395860  | -3.050040 | 4.875518  |
|  | H | 0.943225  | -3.797629 | 5.557795  |
|  | H | 2.498752  | -3.150763 | 4.948190  |
|  | H | 1.124951  | -2.037931 | 5.239054  |

## 1-propene

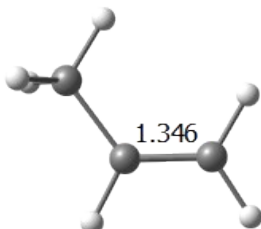

Zero-point correction= 0.076932 (Hartree/Particle)  
Thermal correction to Energy= 0.082369  
Thermal correction to Enthalpy= 0.083488  
Thermal correction to Gibbs Free Energy= 0.046176  
Sum of electronic and zero-point Energies= -117.740192  
Sum of electronic and thermal Energies= -117.734755  
Sum of electronic and thermal Enthalpies= -117.733636  
Sum of electronic and thermal Free Energies= -117.770948

Solvent: -117.799473

9  
CH2CHMe SCF Done: -117.817123757 A.U.  
C 0.129822 0.454947 -0.000017  
H 0.160946 1.561871 0.000098  
C -1.240114 -0.164474 -0.000052  
H -1.826665 0.156321 -0.889680  
H -1.194567 -1.273146 0.001261  
H -1.827151 0.157801 0.888793  
C 1.294145 -0.220405 0.000028  
H 2.264988 0.301283 0.000006  
H 1.319337 -1.324544 -0.000231

**Zn(CH<sub>3</sub>)<sub>2</sub>**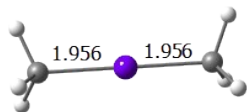

Zero-point correction= 0.068284 (Hartree/Particle)  
 Thermal correction to Energy= 0.074966  
 Thermal correction to Enthalpy= 0.076085  
 Thermal correction to Gibbs Free Energy= 0.034204  
 Sum of electronic and zero-point Energies= -1859.086433  
 Sum of electronic and thermal Energies= -1859.079750  
 Sum of electronic and thermal Enthalpies= -1859.078632  
 Sum of electronic and thermal Free Energies= -1859.120513

Solvent: -1858.9007194

9

ZnMe2 SCF Done: -1859.15471640 A.U.  
 C -1.956198 -0.000027 -0.000080  
 H -2.367610 -0.968328 -0.361999  
 H -2.367251 0.798101 -0.657290  
 Zn -0.000008 0.000002 0.000013  
 C 1.956179 0.000014 -0.000001  
 H 2.367376 0.971191 -0.354547  
 H 2.368083 -0.178663 1.018040  
 H 2.366731 -0.792790 -0.663967  
 H -2.366980 0.170495 1.019867

**Zn(CH<sub>3</sub>)(CH<sub>2</sub>CH(CH<sub>3</sub>)<sub>2</sub>)**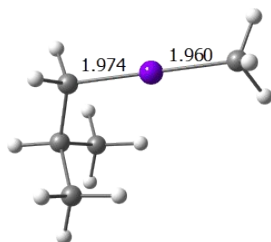

Zero-point correction= 0.151371 (Hartree/Particle)  
 Thermal correction to Energy= 0.164205  
 Thermal correction to Enthalpy= 0.165323  
 Thermal correction to Gibbs Free Energy= 0.106594  
 Sum of electronic and zero-point Energies= -1976.862295  
 Sum of electronic and thermal Energies= -1976.849461  
 Sum of electronic and thermal Enthalpies= -1976.848342  
 Sum of electronic and thermal Free Energies= -1976.907072

Solvent: -1976.7393619

18

ZnMeORG SCF Done: -1977.01366548 A.U.  
 H 1.022985 -1.276019 -1.311357  
 C 1.930369 -0.002869 0.222742  
 C 0.732372 -0.021457 1.195746  
 H 2.878053 -0.011576 0.815669  
 H 0.782229 -0.922131 1.851737  
 H 0.780655 0.855662 1.883069  
 C 1.933972 1.276805 -0.629904  
 H 1.938257 2.189043 0.003097  
 H 2.811568 1.324920 -1.309156  
 H 1.017822 1.319699 -1.265363  
 C 1.938299 -1.252235 -0.673686  
 H 1.944849 -2.185756 -0.072532  
 H 2.816674 -1.274184 -1.353294  
 Zn -0.992720 -0.004993 0.237194  
 C -2.705354 0.013044 -0.715912  
 H -3.218181 0.996082 -0.622768  
 H -2.568317 -0.184332 -1.802471  
 H -3.402927 -0.761338 -0.326373
